# Supplementary material for: Synthesis of pyrazolo[1,5-c]quinazoline derivatives through the copper-catalyzed domino reaction of o-alkenyl aromatic isocyanides with diazo compounds
Source: Royal Society of Chemistry journal article supplement (doi:10.1039/d0cc00594k), 2020-01-01

## Supporting Information

### Synthesis of Pyrazolo[1,5-*c*]quinazoline Derivatives through Copper-Catalyzed Domino Reaction of *o*-Alkenyl Aromatic Isocyanides with Diazo Compounds

Lu Liu,<sup>a</sup> Lei Li,<sup>\*a</sup> Shukuan Mao,<sup>a</sup> Xin Wang,<sup>a</sup> Ming-Dong Zhou,<sup>a</sup> Yu-Long Zhao<sup>b</sup> and  
He Wang<sup>\*a</sup>

<sup>a</sup> School of Chemistry and Materials Science, Liaoning Shihua University, Dandong  
Road 1, Fushun 113001, People's Republic of China

<sup>b</sup> Jilin Province Key Laboratory of Organic Functional Molecular Design & Synthesis,  
Faculty of Chemistry, Northeast Normal University, Changchun 130024, People's  
Republic of China

E-mail: heliwang123@126.com, lilei0814.com@163.com

|                                                                              |     |
|------------------------------------------------------------------------------|-----|
| 1. General Information.....                                                  | S1  |
| 2. Preparation of Substrates and analytical data of compounds <b>1</b> ..... | S1  |
| 3. Experimental Section and Characterization Data of compound <b>3</b> ..... | S15 |
| 4. Derivatization of Product.....                                            | S33 |
| 5. Control Experiment.....                                                   | S34 |
| 6. Crystal structure of <b>3aa</b> .....                                     | S36 |
| 7. NMR Spectra.....                                                          | S38 |

## 1. General Information

All chemicals were obtained from commercial sources and used as received unless otherwise noted. Unless noted, the  $^1\text{H}$  NMR spectra were recorded at 400 MHz in  $\text{CDCl}_3$  or  $\text{DMSO-}d_6$  and the  $^{13}\text{C}$  NMR spectra were recorded at 100 or 125 MHz in  $\text{CDCl}_3$  or  $\text{DMSO-}d_6$  with TMS as internal standard. All coupling constants (J values) were reported in Hertz (Hz). High-resolution mass spectra (HRMS) were obtained on an Agilent Q-TOF 6224 spectrometer. The intensity data were recorded on a Bruker D8 QUEST with Mo-K $\alpha$  radiation ( $\lambda = 0.71073 \text{ \AA}$ ). The crystal structure was solved by means of direct methods and refined by employing full-matrix least squares on F2 (SHELXTL-2014). Column chromatography was performed on silica gel (300-400 mesh) with ethyl acetate (EA)/petroleum ether (PE). The diazo compounds were prepared according to the previous method reported.<sup>1</sup>

## 2. Preparation of Substrates and analytical data of compounds 1

Substrates **1** were prepared by following the procedures in references 2, 3.

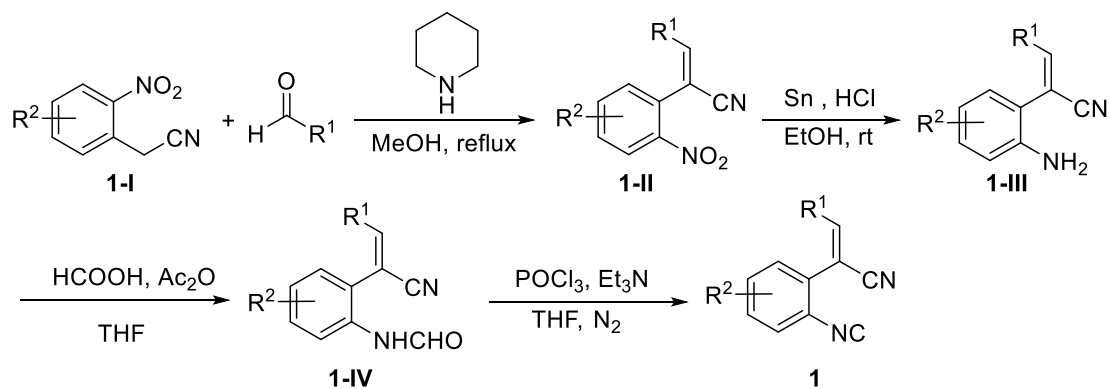

**Scheme S1.** Synthesis of *o*-vinyl aromatic isocyanides **1**.

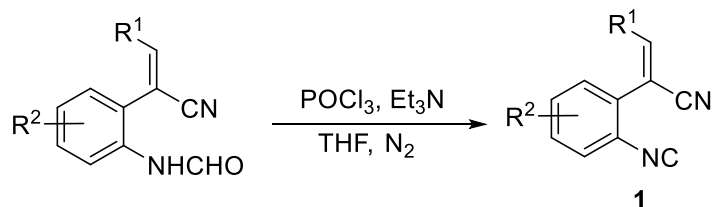

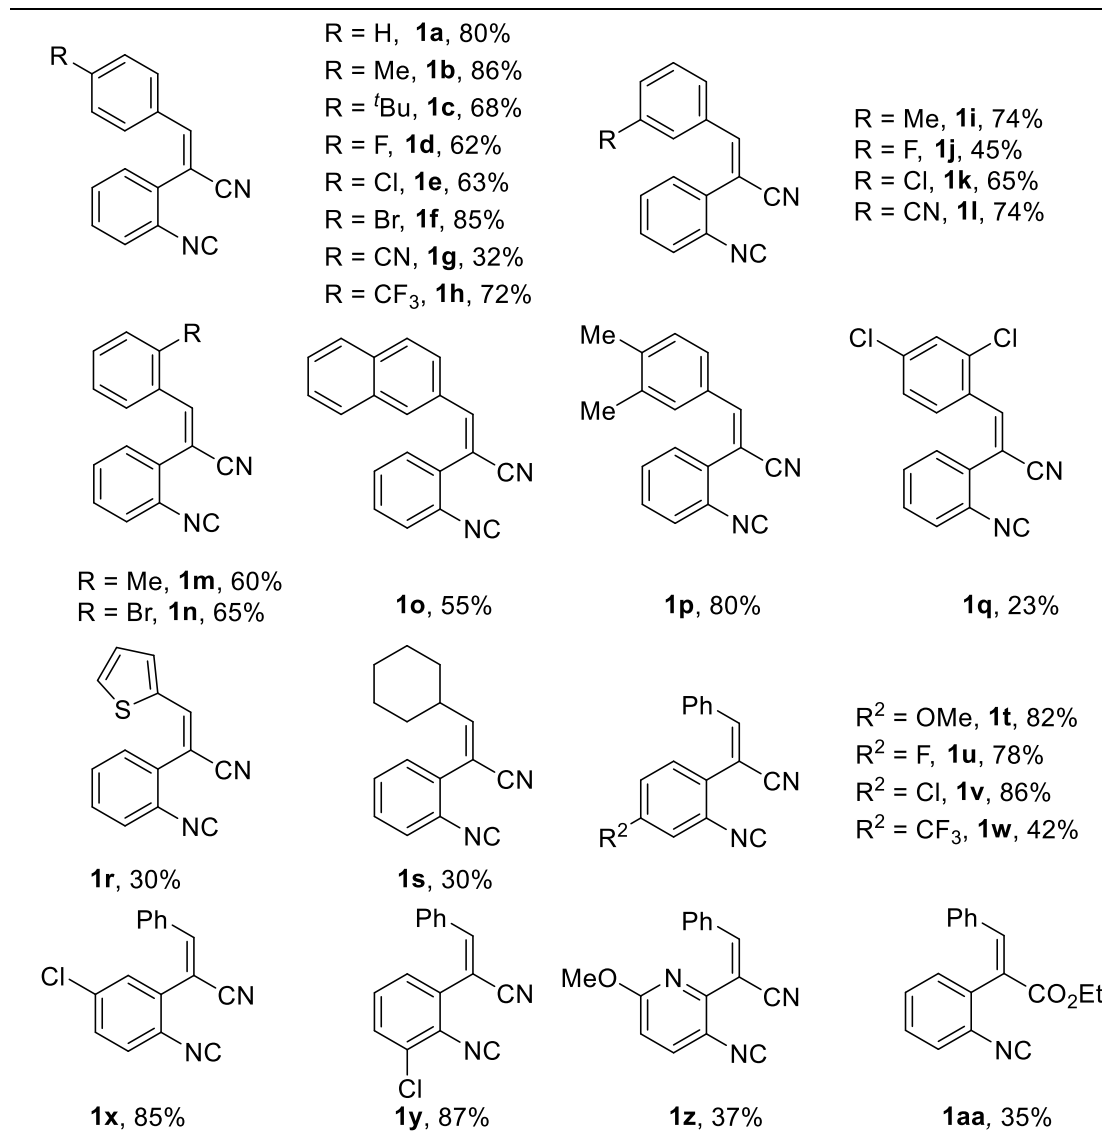

### Typical synthetic procedure (with **1a** as an example)

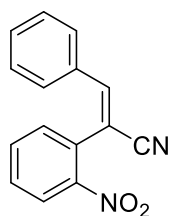

**Synthesis of (E)-2-(2-Nitrophenyl)-3-phenylacrylonitrile:** To a solution of 2-nitrophenylacetonitrile (1.621 g, 10 mmol, 1.0 equiv) in 40 mL of methanol was added 1.167 g of benzaldehyde (11 mmol, 1.1 equiv) and 0.426 g of piperidine (5 mmol, 0.5 equiv). The reaction mixture was heated to reflux at 70°C. After 4 h, the

reaction mixture was cooled to room temperature and the yellow precipitate was collected. Recrystallization of the precipitate from methanol provided the product (*E*)-2-(2-nitrophenyl)-3-phenylacrylonitrile as yellow solid (2.127 g, 85%).

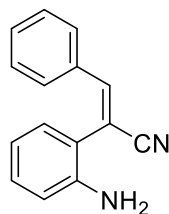

**Synthesis of (*E*)-2-(2-Aminophenyl)-3-phenylacrylonitrile:** To a round bottom flask (50 mL) were added (*E*)-2-(2-nitrophenyl)-3-phenylacrylonitrile (2.002 g, 8 mmol, 1.0 equiv), Sn powder (9.497 g, 80 mmol, 10 equiv) and EtOH (15 mL). The mixture was kept stirring at ambient temperature. HCl (12 M, 12 mL) was slowly injected to the solution mixture at 0°C. After complete the injection, the solution was kept stirring at ambient temperature for another 2 h. The mixture was quenched by saturated aqueous solution of NaHCO<sub>3</sub>. The reaction mixture was extracted with CH<sub>2</sub>Cl<sub>2</sub> (100 mL × 3). The combined organic extracts were dried over anhydrous Na<sub>2</sub>SO<sub>4</sub>, filtered, and concentrated under reduced pressure to yield the (*E*)-2-(2-aminophenyl)-3-phenylacrylonitrile as a light yellow solid (1.057 g, 60%).

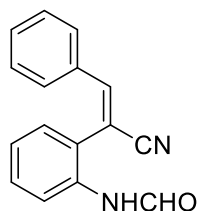

**Synthesis of (*E*)-*N*-(2-(1-Cyano-2-phenylvinyl)phenyl)formamide:** To an oven-dried three necked flask equipped with a dropping funnel, (*E*)-2-(2-aminophenyl)-3-phenylacrylonitrile (0.661 g, 3 mmol) and THF (10 mL) were added under N<sub>2</sub> atmosphere and cooled to 0 °C. Acetic formic anhydride, which was prepared from the reaction of acetic anhydride (2.400 mL) with formic acid (1.200 mL) at 55 °C for 2 h, was transferred to the dropping funnel and dropped to the solution of (*E*)-2-(2-aminophenyl)-3-phenylacrylonitrile at 0 °C. After the addition was complete, the mixture was warmed to room temperature and stirred for 2 h. Then, the mixture was quenched by saturated aqueous solution of NaHCO<sub>3</sub> and extracted with CH<sub>2</sub>Cl<sub>2</sub> three times. The extract was dried over Na<sub>2</sub>SO<sub>4</sub> and concentrated under



reduced pressure to give formamide (*E*)-*N*-(2-(1-cyano-2-phenylvinyl)phenyl)formamide as a pale white solid (0.596 g, 80%).

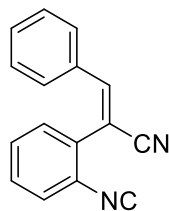

**Synthesis of (*E*)-2-(2-Isocyanophenyl)-3-phenylacrylonitrile 1a:** To an oven-dried three necked flask equipped with a dropping funnel, THF (3 mL), NEt<sub>3</sub> (0.698 ml, 5 mmol, 5.0 equiv) and the (*E*)-*N*-(2-(1-cyano-2-phenylvinyl)phenyl)formamide (0.248 g, 1mmol,) were added under N<sub>2</sub> atmosphere and cooled to 0 °C. POCl<sub>3</sub> (0.230 g, 1.5 mmol, 1.5 equiv) was added dropwise, and the mixture was stirred for 2 h at 0 °C after the addition was complete. Then, the mixture was quenched by saturated aqueous solution of Na<sub>2</sub>CO<sub>3</sub> and stirred for 1 h. The reaction mixture was extracted with CH<sub>2</sub>Cl<sub>2</sub> (10 mL × 3). The combined organic extracts were dried over anhydrous Na<sub>2</sub>SO<sub>4</sub>, filtered, and concentrated under reduced pressure to yield the (*E*)-2-(2-isocyanophenyl)-3-phenylacrylonitrile (0.184 g, 80%).

**Synthesis of 2-(4-Fluoro-2-nitrophenyl)acetonitrile<sup>4</sup>:**

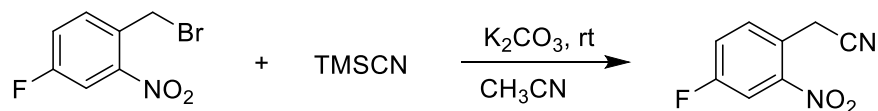

A solution of 1-(bromomethyl)-4-fluoro-2-nitrobenzene (4.680 g, 20 mmol, 1.0equiv), K<sub>2</sub>CO<sub>3</sub> (3.317 g, 24 mmol, 1.2 equiv) in CH<sub>3</sub>CN (50 mL) was under air atmosphere and cooled to 0 °C. TMSCN (2.381 g, 24 mmol, 1.2 equiv) was added dropwise. After the addition was complete, the mixture was warmed to room temperature and stirred for 8 h. The crude reaction mixture was diluted with CH<sub>2</sub>Cl<sub>2</sub>, extracted by aqueous NaHCO<sub>3</sub>. The combined organic layer was collected, dried over the Na<sub>2</sub>SO<sub>4</sub> and concentrated in vacuo. The residue was purified through flash column chromatography by using hexane and ethyl acetate as eluent to give 2-(4-fluoro-2-nitrophenyl)acetonitrile (1.801 g, 50%).

### Synthesis of ethyl 2-(2-Nitrophenyl)acetate<sup>5</sup>:

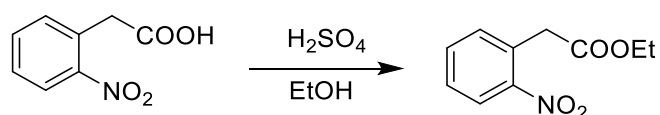

H<sub>2</sub>SO<sub>4</sub> (98%; 0.300 g, 3 mmol, 0.1 equiv) was added to a stirred solution of 2-(2-nitrophenyl)acetic acid (5.434 g, 30 mmol, 1.0 equiv) in EtOH (60 mL). The solution was heated at 60 °C for 24 h, then it was cooled and diluted with H<sub>2</sub>O (100 mL), and extracted with CH<sub>2</sub>Cl<sub>2</sub>. The organic extract was washed with NaHCO<sub>3</sub> (saturated aq.), the combined organic extracts were dried, and the solvents were evaporated to give ethyl 2-(2-nitrophenyl)acetate (6.025 g, 96%).

### Synthesis of ethyl (*E*)-2-(2-nitrophenyl)-3-phenylacrylate:

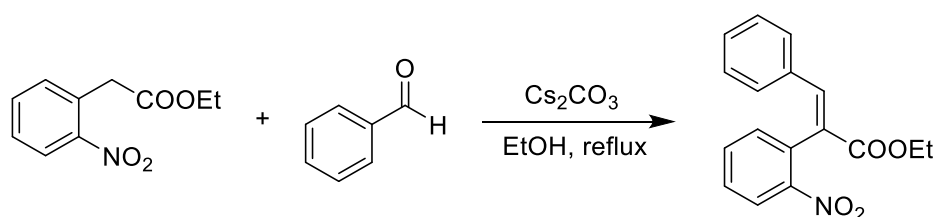

To a solution of ethyl 2-(2-nitrophenyl)acetate (5.230 g, 25 mmol, 1.0 equiv.) in 50 mL of ethanol was added 2.918 g of benzaldehyde (27.5 mmol, 1.1 equiv.) and 4.073 g of cesium carbonate (12.5 mmol, 0.5 equiv.). The reaction mixture was heated to reflux at 85°C. After 4 h, the reaction mixture was cooled to room temperature. The mixture was extracted with CH<sub>2</sub>Cl<sub>2</sub> three times, dried over the anhydrous NaSO<sub>4</sub> and concentrated in vacuo. The compound was purified by column to give ethyl (*E*)-2-(2-nitrophenyl)-3-phenylacrylate white solid (2.230 g, 30%).

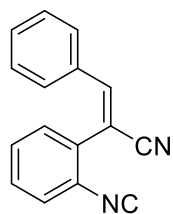

### (*E*)-2-(2-Isocyanophenyl)-3-phenylacrylonitrile (**1a**)

White solid; m.p. 86-87 °C; yield: 184.2 mg (80%); <sup>1</sup>H NMR (400 MHz, CDCl<sub>3</sub>) δ 7.93-7.91 (m, 2H), 7.58-7.56 (m, 1H), 7.52-7.42 (m, 7H). <sup>13</sup>C NMR (100 MHz, CDCl<sub>3</sub>) δ 169.8, 149.0, 132.9, 132.2, 131.5, 130.0, 129.9, 129.5, 129.1, 128.4, 124.5, 117.1, 106.6. HRMS (ESI): calcd for C<sub>16</sub>H<sub>10</sub>N<sub>2</sub> ([M+H]<sup>+</sup>) 231.0917, found. 231.0921.

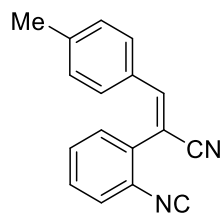

*(E)*-2-(2-Isocyanophenyl)-3-(*p*-tolyl)acrylonitrile (**1b**)

White solid; m.p. 102-103 °C; yield: 210.1 mg (86%); <sup>1</sup>H NMR (400 MHz, CDCl<sub>3</sub>) δ 7.83, (d, *J* = 8.0 Hz, 2H), 7.57-7.55 (m, 1H), 7.50- 7.41 (m, 4H), 7.29 (d, *J* = 8.0 Hz, 2H), 2.42 (s, 3H). <sup>13</sup>C NMR (100 MHz, CDCl<sub>3</sub>) δ 169.5, 149.0, 142.3, 132.4, 130.3, 130.0, 129.9, 129.8, 129.6, 128.4, 124.5, 117.3, 105.2, 21.7. HRMS (ESI): calcd for C<sub>17</sub>H<sub>12</sub>N<sub>2</sub> ([M+H]<sup>+</sup>) 245.1073, found. 245.1075.

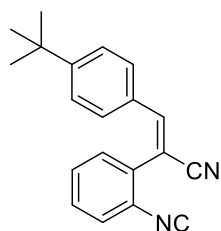

*(E)*-3-(4-(*Tert*-butyl)phenyl)-2-(2-isocyanophenyl)acrylonitrile (**1c**)

White solid; m.p. 105-106 °C; yield: 194.7 mg (68%); <sup>1</sup>H NMR (400 MHz, CDCl<sub>3</sub>) δ 7.88 (d, *J* = 8.4 Hz, 2H), 7.58-7.41 (m, 7H), 1.36 (s, 9H). <sup>13</sup>C NMR (100 MHz, CDCl<sub>3</sub>) δ 169.5, 155.3, 148.9, 132.4, 130.2, 130.0, 129.8, 129.5, 128.4, 126.1, 124.5, 117.3, 105.3, 35.1, 31.1. HRMS (ESI): calcd for C<sub>20</sub>H<sub>18</sub>N<sub>2</sub> ([M+H]<sup>+</sup>) 287.1543, found .287.1549.

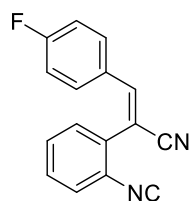

*(E)*-3-(4-Fluorophenyl)-2-(2-isocyanophenyl)acrylonitrile (**1d**)

Yellow solid; m.p. 127-128 °C; yield: 153.9 mg (62%); <sup>1</sup>H NMR (400 MHz, CDCl<sub>3</sub>) δ 7.96-7.93 (m, 2H), 7.58-7.56 (m, 1H), 7.53-7.43 (m, 4H), 7.20-7.16 (m, 2H). <sup>13</sup>C NMR (100 MHz, CDCl<sub>3</sub>) δ 169.6, 164.3 (d, *J* = 252.6 Hz), 147.6, 131.9, 131.8 (d, *J* = 8.7 Hz), 130.1, 130.0, 129.9, 129.2 (d, *J* = 3.3 Hz), 128.4, 124.5, 117.0, 116.4 (d, *J* = 21.9 Hz), 106.2 (d, *J* = 1.7 Hz). HRMS (ESI): calcd for C<sub>16</sub>H<sub>9</sub>FN<sub>2</sub> ([M+H]<sup>+</sup>) 249.0823, found. 249.0826.

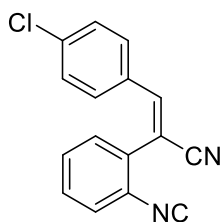

*(E)*-3-(4-Chlorophenyl)-2-(2-isocyanophenyl)acrylonitrile (**1e**)

Yellow solid; m.p. 130-131 °C; yield: 166.8 mg (63%); <sup>1</sup>H NMR (400 MHz, CDCl<sub>3</sub>) δ 7.86 (d, *J* = 8.4 Hz, 2H), 7.58-7.56 (m, 1H), 7.53-7.43 (m, 6H). <sup>13</sup>C NMR (100 MHz, CDCl<sub>3</sub>) δ 169.8, 147.4, 137.5, 131.8, 131.3, 130.7, 130.2, 130.1, 129.9, 129.4, 128.5, 124.5, 116.8, 107.1. HRMS (ESI): calcd for C<sub>16</sub>H<sub>9</sub>ClN<sub>2</sub> ([M+H]<sup>+</sup>) 265.0527, found. 265.0526.

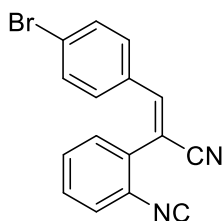

*(E)*-3-(4-Bromophenyl)-2-(2-isocyanophenyl)acrylonitrile (**1f**)

White solid; m.p. 118-119 °C; yield: 262.8 mg (85%); <sup>1</sup>H NMR (400 MHz, CDCl<sub>3</sub>) δ 7.79 (d, *J* = 8.4 Hz, 2H), 7.62 (d, *J* = 8.4 Hz, 2H), 7.58-7.56 (m, 1H), 7.53-7.44 (m, 3H), 7.42 (s, 1H). <sup>13</sup>C NMR (100 MHz, CDCl<sub>3</sub>) δ 169.8, 147.5, 132.4, 131.8, 131.7, 130.8, 130.2, 130.1, 129.9, 128.5, 126.0, 124.4, 116.8, 107.3. HRMS (ESI): calcd for C<sub>16</sub>H<sub>9</sub>BrN<sub>2</sub> ([M+H]<sup>+</sup>) 309.0022, found. 309.0027.

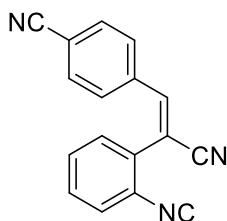

*(E)*-4-(2-Cyano-2-(2-isocyanophenyl)vinyl)benzonitrile (**1g**)

White solid; m.p. 136-137 °C; yield: 81.7 mg (32%); <sup>1</sup>H NMR (400 MHz, CDCl<sub>3</sub>) δ 8.00 (d, *J* = 8.8 Hz, 2H), 7.79 (d, *J* = 8.8 Hz, 2H), 7.62-7.59 (m, 1H), 7.57-7.49 (m, 4H). <sup>13</sup>C NMR (100 MHz, CDCl<sub>3</sub>) δ 170.2, 146.4, 136.9, 132.8, 131.1, 130.7, 130.2, 129.9, 129.8, 128.6, 124.4, 118.0, 116.2, 114.5, 110.4. HRMS (ESI): calcd for C<sub>17</sub>H<sub>9</sub>N<sub>3</sub> ([M+H]<sup>+</sup>) 256.0869, found. 256.0878.

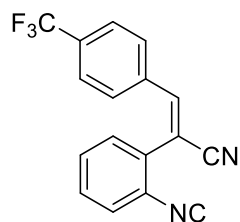

*(E)*-2-(2-Isocyanophenyl)-3-(4-(trifluoromethyl)phenyl)acrylonitrile (**1h**)

White solid; m.p. 97-98 °C; yield: 214.8 mg (72%); <sup>1</sup>H NMR (400 MHz, CDCl<sub>3</sub>) δ 8.02 (d, *J* = 8.4 Hz, 2H), 7.75 (d, *J* = 8.4 Hz, 2H), 7.61-7.59 (m, 1H), 7.55-7.47 (m, 4H). <sup>13</sup>C NMR (100 MHz, CDCl<sub>3</sub>) δ 170.0, 147.1, 136.1, 132.7 (q, *J* = 32.5 Hz), 131.4, 130.5, 130.1, 129.9, 129.6, 128.5, 126.1 (q, *J* = 3.8 Hz), 124.5, 123.6 (q, *J* = 270.8 Hz), 116.4, 109.5. HRMS (ESI): calcd for C<sub>17</sub>H<sub>9</sub>F<sub>3</sub>N<sub>2</sub> ([M+H]<sup>+</sup>) 299.0791, found. 299.0791.

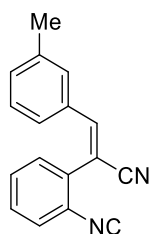

*(E)*-2-(2-Isocyanophenyl)-3-(*m*-tolyl)acrylonitrile (**1i**)

White solid; m.p. 70-71 °C; yield: 180.8 mg (74%); <sup>1</sup>H NMR (400 MHz, CDCl<sub>3</sub>) δ 7.73 (d, *J* = 7.6 Hz, 1H), 7.71 (s, 1H), 7.57 (d, *J* = 6.8 Hz, 1H), 7.49 (t, *J* = 6.8 Hz, 2H), 7.46-7.41 (m, 2H), 7.38 (t, *J* = 7.6 Hz, 1H), 7.30 (d, *J* = 7.6 Hz, 1H), 2.42 (s, 3H). <sup>13</sup>C NMR (100 MHz, CDCl<sub>3</sub>) δ 169.5, 149.2, 138.9, 132.9, 132.3, 132.2, 130.2, 130.0, 129.9, 129.0, 128.4, 126.6, 124.5, 117.1, 106.2, 21.4. HRMS (ESI): calcd for C<sub>17</sub>H<sub>12</sub>N<sub>2</sub> ([M+H]<sup>+</sup>) 245.1073, found. 245.1075.

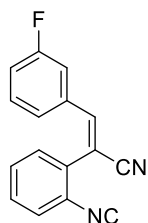

*(E)*-3-(3-Fluorophenyl)-2-(2-isocyanophenyl)acrylonitrile (**1j**)

Yellow solid; m.p. 109-110 °C; yield: 111.7 mg (45%); <sup>1</sup>H NMR (400 MHz, CDCl<sub>3</sub>) δ 7.69-7.63 (m, 2H), 7.59-7.57 (m, 1H), 7.54-7.44 (m, 5H), 7.20 (td, *J* = 8.4, 2.4 Hz, 1H). <sup>13</sup>C NMR (100 MHz, CDCl<sub>3</sub>) δ 169.8, 162.8 (d, *J* = 246.3 Hz), 147.4 (d, *J* = 2.7

Hz), 134.8 (d,  $J = 7.9$  Hz), 131.7, 130.7 (d,  $J = 8.2$  Hz), 130.3, 130.1, 129.9, 128.5, 125.5 (d,  $J = 2.9$  Hz), 124.5. 118.4 (d,  $J = 21.1$  Hz), 116.6, 115.9 (d,  $J = 22.7$  Hz), 108.1.  $^{19}\text{F}$  NMR (377 MHz,  $\text{CDCl}_3$ )  $\delta$  -111.2. HRMS (ESI): calcd for  $\text{C}_{16}\text{H}_9\text{FN}_2$  ( $[\text{M}+\text{H}]^+$ ) 249.0823, found. 249.0827.

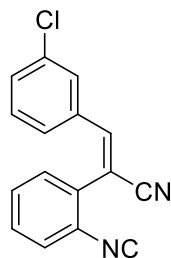

**(E)-3-(3-Chlorophenyl)-2-(2-isocyanophenyl)acrylonitrile (1k)**

Yellow solid; m.p. 101-102 °C; yield: 172.1 mg (65%);  $^1\text{H}$  NMR (400 MHz,  $\text{CDCl}_3$ )  $\delta$  7.87-7.83 (m, 2H), 7.59-7.55 (m, 1H), 7.53-7.41 (m, 6H).  $^{13}\text{C}$  NMR (100 MHz,  $\text{CDCl}_3$ )  $\delta$  169.8, 147.2, 135.1, 134.5, 131.6, 131.3, 130.4, 130.3, 130.1, 129.9, 129.5, 128.5, 127.3, 124.5, 116.6, 108.2. HRMS (ESI): calcd for  $\text{C}_{16}\text{H}_9\text{ClN}_2$  ( $[\text{M}+\text{H}]^+$ ) 265.0527, found. 265.0537.

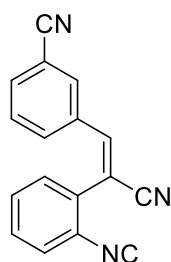

**(E)-3-(2-Cyano-2-(2-isocyanophenyl)vinyl)benzonitrile (1l)**

Yellow solid; m.p. 114-115 °C; yield: 188.9 mg (74%);  $^1\text{H}$  NMR (400 MHz,  $\text{CDCl}_3$ )  $\delta$  8.24-8.21 (m, 1H), 8.09-8.08 (m, 1H), 7.79-7.76 (m, 1H), 7.65 (t,  $J = 8.0$  Hz, 1H), 7.61-7.59 (m, 1H), 7.57-7.51 (m, 3H). 7.49 (s, 1H).  $^{13}\text{C}$  NMR (100 MHz,  $\text{CDCl}_3$ )  $\delta$  170.1, 146.0, 134.2, 134.1, 132.9, 132.8, 131.1, 130.7, 130.2, 130.1, 129.9, 128.5, 124.5, 117.8, 116.2, 113.6, 109.8. HRMS (ESI): calcd for  $\text{C}_{17}\text{H}_9\text{N}_3$  ( $[\text{M}+\text{H}]^+$ ) 256.0869, found. 256.0872.

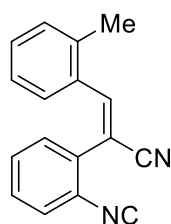

*(E)*-2-(2-Isocyanophenyl)-3-(*o*-tolyl)acrylonitrile (**1m**)

White solid; m.p. 99-100°C; yield: 146.6 mg (60%); <sup>1</sup>H NMR (400 MHz, CDCl<sub>3</sub>) δ 8.04 (d, *J* = 6.8 Hz, 1H), 7.74 (s, 1H), 7.59-7.26 (m, 7H), 2.41 (s, 3H). <sup>13</sup>C NMR (100 MHz, CDCl<sub>3</sub>) δ 169.6, 148.0, 138.1, 132.4, 131.9, 131.1, 130.8, 130.1, 130.0, 128.5, 128.1, 126.5, 124.4, 117.0, 108.6, 20.2. HRMS (ESI): calcd for C<sub>17</sub>H<sub>12</sub>N<sub>2</sub> ([M+H]<sup>+</sup>) 245.1073, found. 245.1078.

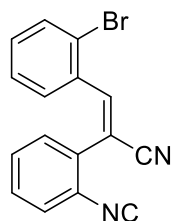

*(E)*-3-(2-Bromophenyl)-2-(2-isocyanophenyl)acrylonitrile (**1n**)

White solid; m.p. 116-117 °C; yield: 201.0 mg (65%); <sup>1</sup>H NMR (400 MHz, CDCl<sub>3</sub>) δ 8.14 (dd, *J* = 8.0, 1.4 Hz, 1H), 7.79 (s, 1H), 7.69 (dd, *J* = 8.0, 1.2 Hz, 1H), 7.62-7.59 (m, 1H), 7.55-7.45 (m, 4H), 7.34 (td, *J* = 8.0, 1.6 Hz, 1H). <sup>13</sup>C NMR (100 MHz, CDCl<sub>3</sub>) δ 170.1, 148.1, 133.3, 133.2, 132.2, 131.4, 130.4, 130.1, 130.0, 129.8, 128.5, 128.0, 125.1, 124.6, 116.2, 110.2. HRMS (ESI): calcd for C<sub>16</sub>H<sub>9</sub>BrN<sub>2</sub> ([M+H]<sup>+</sup>) 309.0022, found. 309.0027.

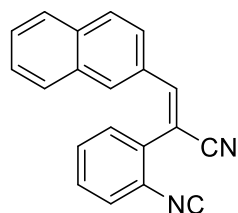

*(E)*-2-(2-Isocyanophenyl)-3-(naphthalen-2-yl)acrylonitrile (**1o**)

White solid; m.p. 126-127 °C; yield: 154.2 mg (55%); <sup>1</sup>H NMR (400 MHz, CDCl<sub>3</sub>) δ 8.30 (s, 1H), 8.13 (dd, *J* = 8.8, 1.6 Hz, 1H), 7.94-7.91 (m, 2H), 7.87 (d, *J* = 8.0 Hz, 1H), 7.62-7.42 (m, 7H). <sup>13</sup>C NMR (100 MHz, CDCl<sub>3</sub>) δ 169.6, 149.0, 134.6, 133.0, 132.3, 131.3, 130.5, 130.1, 130.0, 129.9, 129.0, 128.9, 128.5, 128.2, 127.8, 127.0, 124.9, 124.5, 117.3, 106.4. HRMS (ESI): calcd for C<sub>20</sub>H<sub>12</sub>N<sub>2</sub> ([M+H]<sup>+</sup>) 281.1073, found. 281.1076.

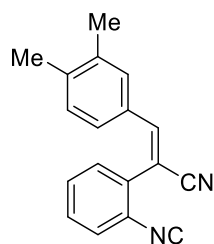

*(E)*-3-(3,4-Dimethylphenyl)-2-(2-isocyanophenyl)acrylonitrile (**1p**)

White solid; m.p. 97-98 °C; yield: 206.7 mg (80%); <sup>1</sup>H NMR (400 MHz, CDCl<sub>3</sub>) δ 7.72-7.70 (m, 1H), 7.68 (s, 1H), 7.57-7.54 (m, 1H), 7.50-7.46 (m, 2H), 7.44-7.42 (m, 1H), 7.40 (s, 1H), 7.24 (d, *J* = 8.4 Hz, 1H), 2.32 (s, 6H). <sup>13</sup>C NMR (100 MHz, CDCl<sub>3</sub>) δ 169.4, 149.2, 141.1, 137.5, 132.5, 130.8, 130.7, 130.4, 129.9, 129.7, 128.4, 127.1, 124.5, 117.4, 104.9, 20.0, 19.8. HRMS (ESI): calcd for C<sub>18</sub>H<sub>14</sub>N<sub>2</sub> ([M+H]<sup>+</sup>) 259.1230, found. 259.1321

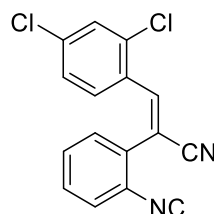

*(E)*-3-(2,4-Dichlorophenyl)-2-(2-isocyanophenyl)acrylonitrile (**1q**)

White solid; m.p. 110-111 °C; yield: 68.8 mg (23%); <sup>1</sup>H NMR (400 MHz, CDCl<sub>3</sub>) δ 8.15 (d, *J* = 8.8 Hz, 1H), 7.79 (s, 1H), 7.61-7.58 (m, 1H), 7.55-7.47 (m, 4H), 7.42 (dd, *J* = 8.4, 2.0 Hz, 1H). <sup>13</sup>C NMR (100 MHz, CDCl<sub>3</sub>) δ 170.2, 144.2, 137.6, 135.8, 131.2, 130.5, 130.1 (2C), 130.0 (2C), 129.9, 128.6, 127.8, 124.5, 116.1, 110.4. HRMS (ESI): calcd for C<sub>16</sub>H<sub>8</sub>Cl<sub>2</sub>N<sub>2</sub> ([M+H]<sup>+</sup>) 299.0137, found. 299.0139.

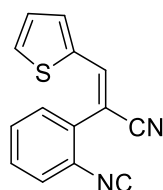

*(E)*-2-(2-Isocyanophenyl)-3-(thiophen-2-yl)acrylonitrile (**1r**)

White solid; m.p. 118-119 °C; yield: 70.9 mg (30%); <sup>1</sup>H NMR (400 MHz, CDCl<sub>3</sub>) δ 7.70 (d, *J* = 3.6 Hz, 1H), 7.63 (s, 2H), 7.57-7.55 (m, 1H), 7.51-7.46 (m, 2H), 7.44-7.40 (m, 1H), 7.19-7.17 (m, 1H). <sup>13</sup>C NMR (100 MHz, CDCl<sub>3</sub>) δ 169.7, 140.9, 137.0, 133.9, 131.6, 131.5, 130.0, 129.9, 129.8, 128.5, 128.0, 124.4, 117.3, 102.9. HRMS (ESI): calcd for C<sub>14</sub>H<sub>8</sub>N<sub>2</sub>S ([M+H]<sup>+</sup>) 237.0481, found. 237.0483.



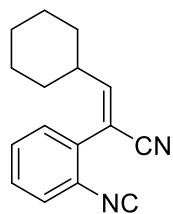

*(E)*-3-Cyclohexyl-2-(2-isocyanophenyl)acrylonitrile (**1s**)

Yellow liquid; yield: 70.9 mg (30%);  $^1\text{H}$  NMR (400 MHz,  $\text{CDCl}_3$ )  $\delta$  7.46-7.38 (m, 4H), 6.70 (d,  $J = 10.4$  Hz, 1H), 2.86-2.76 (m, 1H), 1.90-1.66 (m, 5H), 1.47-1.19 (m, 5H).  $^{13}\text{C}$  NMR (100 MHz,  $\text{CDCl}_3$ )  $\delta$  169.1, 159.9, 130.8, 129.8, 129.7, 129.6, 128.2, 124.4, 115.8, 108.8, 41.8, 31.8, 25.5, 25.1 HRMS (ESI): calcd for  $\text{C}_{16}\text{H}_{16}\text{N}_2$  ( $[\text{M}+\text{H}]^+$ ) 237.1386, found. 237.1387.

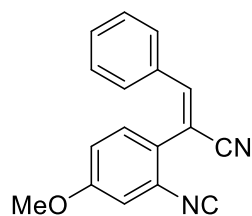

*(E)*-2-(2-Isocyano-4-methoxyphenyl)-3-phenylacrylonitrile (**1t**)

White solid; m.p. 97-98 °C; yield: 214.3 mg (82%);  $^1\text{H}$  NMR (400 MHz,  $\text{CDCl}_3$ )  $\delta$  7.91-7.89 (m, 2H), 7.50-7.46 (m, 4H), 7.41 (s, 1H), 7.03-6.99 (m, 2H), 3.86 (s, 3H).  $^{13}\text{C}$  NMR (100 MHz,  $\text{CDCl}_3$ )  $\delta$  169.2, 160.3, 147.9, 133.1, 131.2, 131.0, 129.3, 129.0, 124.5, 117.3, 116.3, 113.4, 106.4, 100.0, 55.9. HRMS (ESI): calcd for  $\text{C}_{17}\text{H}_{12}\text{N}_2\text{O}$  ( $[\text{M}+\text{H}]^+$ ) 261.1022, found. 261.1025.

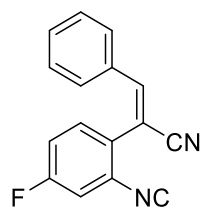

*(E)*-2-(4-Fluoro-2-isocyanophenyl)-3-phenylacrylonitrile (**1u**)

White solid; m.p. 108-109 °C; yield: 193.6 mg (78%);  $^1\text{H}$  NMR (400 MHz,  $\text{CDCl}_3$ )  $\delta$  7.93-7.90 (m, 2H), 7.58-7.55 (m, 1H), 7.52-7.49 (m, 3H), 7.43 (s, 1H), 7.26-7.21 (m, 2H).  $^{13}\text{C}$  NMR (100 MHz,  $\text{CDCl}_3$ )  $\delta$  171.0, 162.3 (d,  $J = 251.8$  Hz), 149.2, 132.7, 131.7 (d,  $J = 9.1$  Hz), 131.6, 129.5, 129.2, 128.6 (d,  $J = 4.0$  Hz), 125.6, 117.7 (d,  $J = 21.4$  Hz), 116.9, 116.8 (d,  $J = 25.6$  Hz), 105.6.  $^{19}\text{F}$  NMR (377 MHz,  $\text{CDCl}_3$ )  $\delta$  -108.4. HRMS (ESI): calcd for  $\text{C}_{16}\text{H}_9\text{FN}_2$  ( $[\text{M}+\text{H}]^+$ ) 249.0823, found. 249.0825.

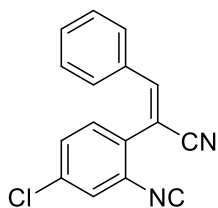

(*E*)-2-(4-Chloro-2-isocyanophenyl)-3-phenylacrylonitrile (**1v**)

White solid; m.p. 106-107 °C; yield: 226.3 mg (86%); <sup>1</sup>H NMR (400 MHz, CDCl<sub>3</sub>) δ 7.93-7.90 (m, 2H), 7.53-7.46 (m, 7H). <sup>13</sup>C NMR (100 MHz, CDCl<sub>3</sub>) δ 171.3, 149.3, 135.7, 132.7, 131.7, 131.0, 130.7, 130.4, 129.6, 129.2, 128.3, 125.2, 116.7, 105.5. HRMS (ESI): calcd for C<sub>16</sub>H<sub>9</sub>ClN<sub>2</sub> ([M+H]<sup>+</sup>) 265.0527, found. 265.0531.

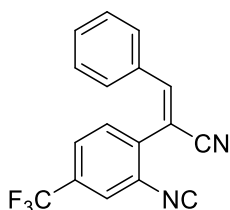

(*E*)-2-(2-Isocyano-4-(trifluoromethyl)phenyl)-3-phenylacrylonitrile (**1w**)

Yellow solid; m.p. 104-105 °C; yield: 125.2 mg (42%); <sup>1</sup>H NMR (400 MHz, CDCl<sub>3</sub>) δ 7.85-7.83 (m, 2H), 7.67-7.62 (m, 3H), 7.44-7.38 (m, 4H). <sup>13</sup>C NMR (100 MHz, CDCl<sub>3</sub>) δ 172.2, 150.2, 135.5, 132.5, 132.3 (q, *J* = 34.0 Hz), 132.0, 130.8, 129.7, 129.2, 126.7 (q, *J* = 3.7 Hz), 125.5 (q, *J* = 3.8 Hz), 125.0, 122.6 (q, *J* = 271.2 Hz), 116.4, 105.3. HRMS (ESI): calcd for C<sub>17</sub>H<sub>9</sub>F<sub>3</sub>N<sub>2</sub> ([M+H]<sup>+</sup>) 299.0791, found. 299.0793.

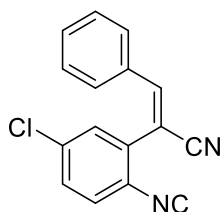

(*E*)-2-(5-Chloro-2-isocyanophenyl)-3-phenylacrylonitrile (**1x**)

White solid; m.p. 99-100 °C; yield: 223.1 mg (85%); <sup>1</sup>H NMR (400 MHz, CDCl<sub>3</sub>) δ 7.94-7.91 (m, 2H), 7.57-7.40 (m, 7H). <sup>13</sup>C NMR (100 MHz, CDCl<sub>3</sub>) δ 171.1, 149.8, 136.0, 133.6, 132.6, 131.9, 130.1, 130.0, 129.6, 129.5, 129.2, 123.0, 116.5, 105.4. HRMS (ESI): calcd for C<sub>16</sub>H<sub>9</sub>ClN<sub>2</sub> ([M+H]<sup>+</sup>) 265.0527, found. 265.0524.

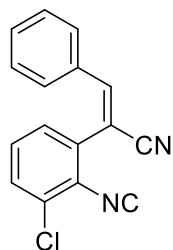

*(E)*-2-(3-Chloro-2-isocyanophenyl)-3-phenylacrylonitrile (**1y**)

White solid; m.p. 128-129 °C; yield: 230.5 mg (87%); <sup>1</sup>H NMR (400 MHz, CDCl<sub>3</sub>) δ 7.94-7.91 (m, 2H), 7.58-7.41 (m, 7H). <sup>13</sup>C NMR (100 MHz, CDCl<sub>3</sub>) δ 174.9, 149.6, 134.2, 132.8, 132.6, 131.8, 130.5, 130.1, 129.6, 129.2, 128.1, 127.1, 116.7, 106.0. HRMS (ESI): calcd for C<sub>16</sub>H<sub>9</sub>ClN<sub>2</sub> ([M+H]<sup>+</sup>) 265.0527, found. 265.0529.

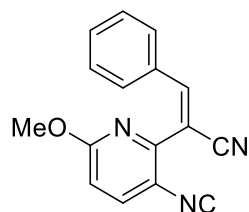

*(E)*-2-(3-Isocyano-6-methoxypyridin-2-yl)-3-phenylacrylonitrile (**1z**)

Yellow solid; m.p. 96-97 °C; yield: 96.3 mg (37%); <sup>1</sup>H NMR (400 MHz, CDCl<sub>3</sub>) δ 8.01-7.98 (m, 3H), 7.66 (d, *J* = 8.8 Hz, 1H), 7.53-7.51 (m, 3H), 6.79 (d, *J* = 8.8 Hz, 1H), 4.04 (s, 3H). <sup>13</sup>C NMR (100 MHz, CDCl<sub>3</sub>) δ 172.6, 162.5, 150.1, 138.9, 132.7, 131.9, 130.1, 129.1, 128.8, 116.3, 114.9, 112.1, 107.7, 54.5. HRMS (ESI): calcd for C<sub>16</sub>H<sub>11</sub>N<sub>3</sub>O ([M+H]<sup>+</sup>) 262.0975, found. 262.0978.

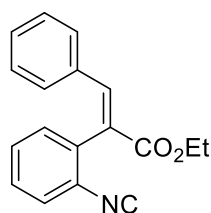

Ethyl *(E)*-2-(2-isocyanophenyl)-3-phenylacrylate (**1aa**)

White solid; m.p. 68-69 °C; yield: 97.1 mg (35%); <sup>1</sup>H NMR (400 MHz, CDCl<sub>3</sub>) δ 8.04 (s, 1H), 7.47-7.42 (m, 1H), 7.41-7.36 (m, 2H), 7.27-7.23 (m, 2H), 7.20-7.17 (m, 2H), 7.02-6.99 (m, 2H), 4.29 (q, *J* = 7.2 Hz, 2H), 1.30 (t, *J* = 7.2 Hz, 3H). <sup>13</sup>C NMR (100 MHz, CDCl<sub>3</sub>) δ 166.2, 143.0, 134.1, 134.0, 131.2, 130.2, 129.7, 129.6, 129.0, 128.5, 128.1, 127.2, 61.6, 14.3. HRMS (ESI): calcd for C<sub>18</sub>H<sub>15</sub>NO<sub>2</sub> ([M+H]<sup>+</sup>) 278.1176, found. 278.1178.

### 3. Experimental Section and Characterization Data of compound 3

#### (3aa as Example):

Table S1. Optimization of the reaction conditions<sup>a,b</sup>

**1a** + **2a**  $\xrightarrow[\text{DMAc, 1 h}]{\text{catalyst (x mol\%) base (n equiv.)}}$  **3aa**

| Entry          | Catalyst (x mol%)                    | Base (n equiv.) | Yield (%) <sup>b</sup> |
|----------------|--------------------------------------|-----------------|------------------------|
| 1              | CuI (20)                             | DBU (0.5)       | 16%                    |
| 2              | CuI (20)                             | DBU (1.5)       | 50%                    |
| 3              | CuI (20)                             | DBU (2.0)       | 78%                    |
| 4              | CuI (20)                             | DBU (3.0)       | 67%                    |
| 5 <sup>c</sup> | CuI (20)                             | DBU (2.0)       | 66%                    |
| 6 <sup>d</sup> | CuI (20)                             | DBU (2.0)       | 78%                    |
| 7 <sup>e</sup> | CuI (20)                             | DBU (2.0)       | 59%                    |
| 8              | CuI (10)                             | DBU (2.0)       | 68%                    |
| 9              | CuBr (20)                            | DBU (2.0)       | 57%                    |
| 10             | CuCl (20)                            | DBU (2.0)       | 72 %                   |
| 11             | Cu <sub>2</sub> O (20)               | DBU (2.0)       | 63%                    |
| 12             | CuCN (20)                            | DBU (2.0)       | 56%                    |
| 13             | CuCl <sub>2</sub> (20)               | DBU (2.0)       | 68%                    |
| 14             | Cu(OAc) <sub>2</sub> (20)            | DBU (2.0)       | 62%                    |
| 15             | Ag <sub>2</sub> CO <sub>3</sub> (20) | DBU (2.0)       | 43%                    |
| 16             | AgOAc (20)                           | DBU (2.0)       | 68%                    |

<sup>a</sup> Reactions were carried out using **1a** (0.2 mmol), **2a** (0.3 mmol), catalyst (20 mol%), base (0.4 mmol) and in a DMAc (1 mL) at room temperature for 1 h under air. <sup>b</sup> Isolated yield. <sup>c</sup> under N<sub>2</sub> atmosphere. <sup>d</sup> **2a** (0.4 mmol). <sup>e</sup> Reaction was performed at 40 °C.

**Table S2.** Optimization of Reaction Conditions<sup>a,b</sup>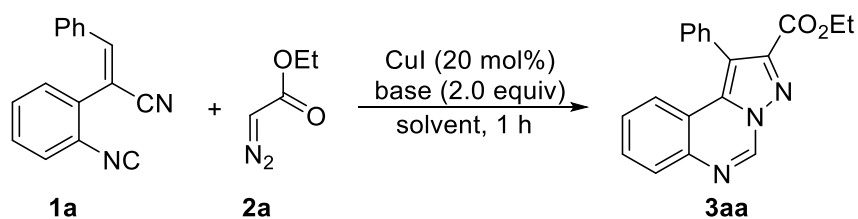

| entry | solvent            | base (2.0 equiv)                 | yield [%] |
|-------|--------------------|----------------------------------|-----------|
| 1     | DMAc               | NaOH                             | 37%       |
| 2     | DMAc               | K <sub>2</sub> CO <sub>3</sub>   | 40%       |
| 3     | DMAc               | Et <sub>3</sub> N                | 0         |
| 4     | DMAc               | pyridine                         | 0         |
| 5     | DMAc               | <sup>t</sup> BuOK                | 0         |
| 6     | DMAc               | DABCO                            | 0         |
| 7     | DMAc               | Na <sub>2</sub> HPO <sub>4</sub> | 0         |
| 8     | CH <sub>3</sub> CN | DBU                              | 71%       |
| 9     | DMF                | DBU                              | 72%       |
| 10    | THF                | DBU                              | 11%       |
| 11    | DMSO               | DBU                              | 69%       |
| 12    | toluene            | DBU                              | 12%       |
| 13    | 1,4-dioxane        | DBU                              | 44%       |
| 14    | EtOH               | DBU                              | 18%       |
| 15    | HFIP               | DBU                              | 0         |
| 16    | TFE                | DBU                              | 0         |

<sup>a</sup> Reactions were carried out using **1a** (0.2 mmol), **2a** (0.3 mmol), CuI (20 mol%), base (0.4 mmol) and in a solvent (1 mL) at room temperature for 1 h under air. <sup>b</sup> Isolated yield.

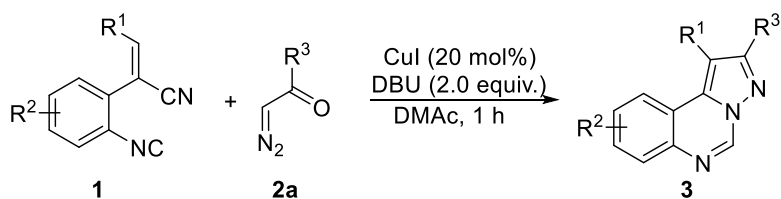

A solution of **1a** (0.2 mmol, 46.1 mg), **2a** (0.3 mmol, 0.037 mL), CuI (20 mol %), and DBU (0.4 mmol, 0.062 mL) in DMAc (1.0 mL) was stirred at room temperature for 1 h. After the reaction was complete (monitored by TLC), the solvent was removed under reduced pressure. The crude residue was purified by silica gel column chromatography (EtOAc/petroleum ether = 1:15, V/V) to afford pure product **3aa** (49.5mg, 78%) as a yellow solid.

A gram-scale synthesis of compound **3aa**:

A solution of **1a** (5 mmol, 1.15g), **2a** (7.5 mmol, 0.928 mL), CuI (20 mol %), and DBU (10 mmol, 1.551 mL) in DMAc (25 mL) was stirred at room temperature for 1 h. After the reaction was complete (monitored by TLC), the reaction mixture was poured into water (100 mL) and extracted with CH<sub>2</sub>Cl<sub>2</sub> (30 mL × 3). The combined organic extracts were dried over anhydrous Na<sub>2</sub>SO<sub>4</sub>, filtered and concentrated under reduced pressure to yield the corresponding crude product. The crude residue was purified by silica gel column chromatography (EtOAc/petroleum ether = 1:15, V/V) to afford pure product **3aa** (1.13 g, 71%) as a yellow solid.

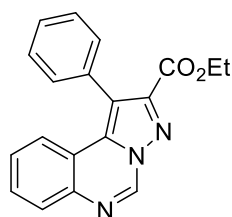

Ethyl 1-phenylpyrazolo[1,5-*c*]quinazoline-2-carboxylate (**3aa**)

Yellow solid; m.p. 110-111 °C; yield: 49.5 mg (78%); <sup>1</sup>H NMR (400 MHz, CDCl<sub>3</sub>) δ 9.19 (s, 1H), 7.96-7.94 (m, 1H), 7.63-7.59 (m, 1H), 7.55-7.51 (m, 4H), 7.18-7.45 (m, 2H), 7.37-7.33 (m, 1H), 4.34 (q, *J* = 7.2 Hz, 2H), 1.25 (t, *J* = 7.2 Hz, 3H). <sup>13</sup>C NMR (100 MHz, CDCl<sub>3</sub>) δ 161.9, 144.8, 139.8, 139.2, 136.1, 131.7, 130.4, 130.1, 129.1, 128.7, 128.5, 128.4, 123.0, 120.5, 118.6, 61.5, 14.0. HRMS (ESI): calcd for C<sub>19</sub>H<sub>15</sub>N<sub>3</sub>O<sub>2</sub> ([M+H]<sup>+</sup>) 318.1237, found 318.1242.

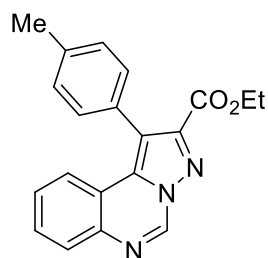

Ethyl 1-(*p*-tolyl)pyrazolo[1,5-*c*]quinazoline-2-carboxylate (**3ba**)

Yellow solid; m.p. 125-126 °C; yield: 35.1 mg (53%); <sup>1</sup>H NMR (400 MHz, CDCl<sub>3</sub>) δ 9.18 (s, 1H), 7.95 (d, *J* = 8.0 Hz, 1H), 7.63-7.58 (m, 2H), 7.39-7.33 (m, 5H), 4.36 (q, *J* = 7.2 Hz, 2H), 2.49 (s, 3H), 1.29 (t, *J* = 7.2 Hz, 3H). <sup>13</sup>C NMR (100 MHz, CDCl<sub>3</sub>) δ 162.0, 144.8, 139.8, 139.3, 138.2, 136.1, 130.2, 130.0, 129.4, 129.0, 128.5, 128.4, 123.1, 120.6, 118.8, 61.5, 21.5, 14.1. HRMS (ESI): calcd for C<sub>20</sub>H<sub>17</sub>N<sub>3</sub>O<sub>2</sub> ([M+H]<sup>+</sup>) 332.1394, found 332.1396.

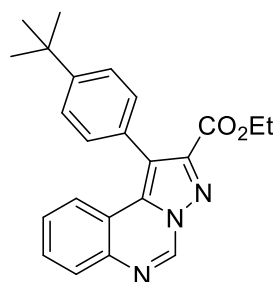

Ethyl 1-(4-(*tert*-butyl)phenyl)pyrazolo[1,5-*c*]quinazoline-2-carboxylate (**3ca**)

Yellow solid; m.p. 151-153 °C; yield: 34.3 mg (46%); <sup>1</sup>H NMR (400 MHz, CDCl<sub>3</sub>) δ 9.19 (s, 1H), 7.96-7.94 (m, 1H), 7.62-7.59 (m, 2H), 7.54 (d, *J* = 8.4 Hz, 2H), 7.40-7.37 (m, 3H), 4.33 (q, *J* = 7.2 Hz, 2H), 1.43 (s, 9H), 1.23 (t, *J* = 7.2 Hz, 3H). <sup>13</sup>C NMR (100 MHz, CDCl<sub>3</sub>) δ 162.0, 151.3, 144.9, 139.8, 139.3, 136.1, 130.0, 129.5, 129.0, 128.5, 126.1, 125.5, 123.1, 120.6, 118.7, 61.5, 34.8, 31.4, 13.9. HRMS (ESI): calcd for C<sub>23</sub>H<sub>23</sub>N<sub>3</sub>O<sub>2</sub> ([M+H]<sup>+</sup>) 374.1863, found 374.1867.

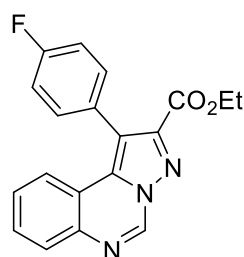

Ethyl 1-(4-fluorophenyl)pyrazolo[1,5-*c*]quinazoline-2-carboxylate (**3da**)

Yellow solid; m.p. 134-135 °C; yield: 41.6 mg (62%); <sup>1</sup>H NMR (400 MHz, CDCl<sub>3</sub>) δ

9.19 (s, 1H), 7.97 (d,  $J = 8.4$  Hz, 1H), 7.66-7.62 (m, 1H), 7.52 (dd,  $J = 1.2, 8.0$  Hz, 1H), 7.48-7.43 (m, 2H), 7.41-7.37 (m, 1H), 7.27-7.21 (m, 2H), 4.36 (q,  $J = 7.2$  Hz, 2H), 1.29 (t,  $J = 7.2$  Hz, 3H).  $^{13}\text{C}$  NMR (100 MHz,  $\text{CDCl}_3$ )  $\delta$  162.9 (d,  $J = 246.3$  Hz), 161.8, 144.7, 139.8, 139.2, 136.3, 132.2 (d,  $J = 8.1$  Hz), 130.2, 129.2, 128.6, 127.4 (d,  $J = 3.6$  Hz), 122.8, 120.3, 117.5, 115.8 (d,  $J = 21.4$  Hz), 61.6, 14.1. HRMS (ESI): calcd for  $\text{C}_{19}\text{H}_{14}\text{FN}_3\text{O}_2$  ( $[\text{M}+\text{H}]^+$ ) 336.1143, found 336.1147.

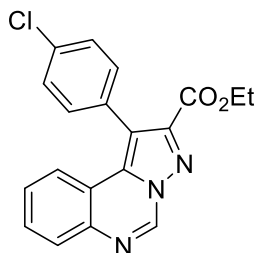

Ethyl 1-(4-chlorophenyl)pyrazolo[1,5-*c*]quinazoline-2-carboxylate (**3ea**)

Yellow solid; m.p. 148-149 °C; yield: 44.2 mg (63%);  $^1\text{H}$  NMR (400 MHz,  $\text{CDCl}_3$ )  $\delta$  9.18 (s, 1H), 7.97 (d,  $J = 8.0$  Hz, 1H), 7.66-7.62 (m, 1H), 7.55-7.50 (m, 3H), 7.44-7.38 (m, 3H), 4.36, (q,  $J = 7.2$  Hz, 2H), 1.30 (t,  $J = 7.2$  Hz, 3H).  $^{13}\text{C}$  NMR (100 MHz,  $\text{CDCl}_3$ )  $\delta$  161.8, 144.6, 139.9, 139.1, 136.2, 134.6, 131.9, 130.3, 130.2, 129.2, 129.0, 128.6, 122.9, 120.2, 117.3, 61.7, 14.1. HRMS (ESI): calcd for  $\text{C}_{19}\text{H}_{14}\text{ClN}_3\text{O}_2$  ( $[\text{M}+\text{H}]^+$ ) 352.0847, found 352.0853.

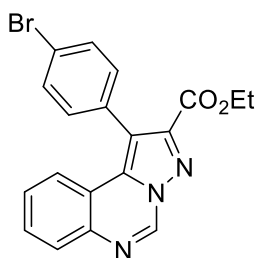

Ethyl 1-(4-bromophenyl)pyrazolo[1,5-*c*]quinazoline-2-carboxylate (**3fa**)

Yellow solid; m.p. 156-157 °C; yield: 51.4 mg (65%);  $^1\text{H}$  NMR (400 MHz,  $\text{CDCl}_3$ )  $\delta$  9.18 (s, 1H), 7.97 (d,  $J = 8.0$  Hz, 1H), 7.69-7.62 (m, 3H), 7.54 (d,  $J = 7.6$  Hz, 1H), 7.40 (t,  $J = 7.6$  Hz, 1H), 7.36 (d,  $J = 8.4$  Hz, 2H), 4.36 (q,  $J = 7.2$  Hz, 2H), 1.30 (t,  $J = 7.2$  Hz, 3H).  $^{13}\text{C}$  NMR (100 MHz,  $\text{CDCl}_3$ )  $\delta$  161.8, 144.5, 139.9, 139.1, 136.1, 132.2, 131.9, 130.7, 130.3, 129.2, 128.6, 122.9, 122.8, 120.2, 117.3, 61.7, 14.1. HRMS (ESI): calcd for  $\text{C}_{19}\text{H}_{14}\text{BrN}_3\text{O}_2$  ( $[\text{M}+\text{H}]^+$ ) , 396.0342, found 396.0347.



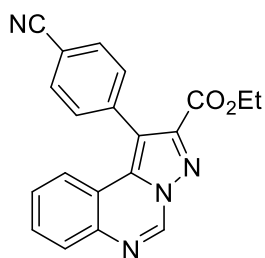

Ethyl 1-(4-cyanophenyl)pyrazolo[1,5-*c*]quinazoline-2-carboxylate (**3ga**)

Yellow solid; m.p. 214-215 °C; yield: 41.1 mg (60%); <sup>1</sup>H NMR (400 MHz, CDCl<sub>3</sub>) δ 9.21 (s, 1H), 8.00 (d, *J* = 8.4 Hz, 1H), 7.85 (d, *J* = 8.4 Hz, 2H), 7.70-7.65 (m, 1H), 7.63 (d, *J* = 8.4 Hz, 2H), 7.45-7.39 (m, 2H), 4.36 (q, *J* = 7.2 Hz, 2H), 1.29 (t, *J* = 7.2 Hz, 3H). <sup>13</sup>C NMR (100 MHz, CDCl<sub>3</sub>) δ 161.6, 144.3, 140.0, 139.1, 137.1, 136.2, 132.4, 131.5, 130.6, 129.5, 128.8, 122.7, 119.9, 118.6, 116.6, 112.5, 61.9, 14.1. HRMS (ESI): calcd for C<sub>20</sub>H<sub>14</sub>N<sub>4</sub>O<sub>2</sub> ([M+H]<sup>+</sup>) 343.1190, found 343.1191.

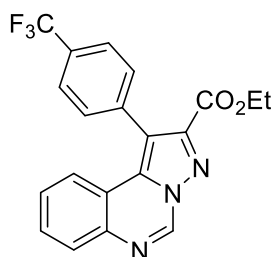

Ethyl 1-(4-(trifluoromethyl)phenyl)pyrazolo[1,5-*c*]quinazoline-2-carboxylate (**3ha**)

Yellow solid; m.p. 179-180 °C; yield: 53.1 mg (69%); <sup>1</sup>H NMR (400 MHz, CDCl<sub>3</sub>) δ 9.21 (s, 1H), 7.99 (d, *J* = 8.0 Hz, 1H), 7.81 (d, *J* = 7.6 Hz, 2H), 7.68-7.61 (m, 3H), 7.47 (d, *J* = 7.6 Hz, 1H), 7.41 (t, *J* = 7.6 Hz, 1H), 4.35 (q, *J* = 7.2 Hz, 2H), 1.27 (t, *J* = 7.2 Hz, 3H). <sup>13</sup>C NMR (100 MHz, CDCl<sub>3</sub>) δ 161.7, 144.5, 139.9, 139.1, 136.2, 135.8 (q, *J* = 1.1 Hz), 131.0, 130.6 (q, *J* = 32.6 Hz), 130.4, 129.3, 128.7, 125.6 (q, *J* = 3.7 Hz), 124.1 (q, *J* = 270.5 Hz), 122.8, 120.0, 117.0, 61.7, 14.0. HRMS (ESI): calcd for C<sub>20</sub>H<sub>14</sub>F<sub>3</sub>N<sub>3</sub>O<sub>2</sub> ([M+H]<sup>+</sup>) 386.1111, found 386.1116.

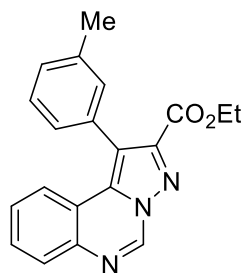

Ethyl 1-(*m*-tolyl)pyrazolo[1,5-*c*]quinazoline-2-carboxylate (**3ia**)

Yellow solid; m.p. 90-91 °C; yield: 33.1 mg (50%); <sup>1</sup>H NMR (400 MHz, CDCl<sub>3</sub>) δ 9.19 (s, 1H), 7.95 (dd, *J* = 8.0, 1.2 Hz, 1H), 7.64-7.59 (m, 1H), 7.57-7.54 (m, 1H), 7.42 (t, *J* = 7.6 Hz, 1H), 7.36-7.34 (m, 1H), 7.34-7.31 (m, 1H), 7.28-7.25 (m, 2H), 4.35 (q, *J* = 7.2 Hz, 2H), 2.44 (s, 3H), 1.27 (t, *J* = 7.2 Hz, 3H). <sup>13</sup>C NMR (100 MHz, CDCl<sub>3</sub>) δ 161.9, 144.8, 139.8, 139.2, 138.2, 136.1, 131.6, 131.0, 130.0, 129.2, 129.1, 128.5, 128.4, 127.4, 123.1, 120.5, 118.9, 61.5, 21.5, 14.0. HRMS (ESI): calcd for C<sub>20</sub>H<sub>17</sub>N<sub>3</sub>O<sub>2</sub> ([M+H]<sup>+</sup>) 332.1394, found 332.1398.

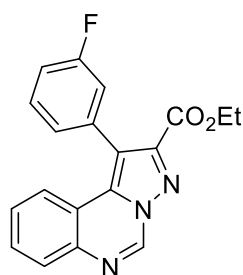

Ethyl 1-(3-fluorophenyl)pyrazolo[1,5-*c*]quinazoline-2-carboxylate (**3ja**)

Yellow solid; m.p. 125-127°C; yield: 40.9 mg (61%); <sup>1</sup>H NMR (400 MHz, CDCl<sub>3</sub>) δ 9.19 (s, 1H), 7.97 (d, *J* = 8.4, 1H), 7.66-7.62 (m, 1H), 7.54-7.48 (m, 2H), 7.39 (t, *J* = 7.2 Hz, 1H), 7.26-7.18 (m, 3H), 4.36 (q, *J* = 7.2 Hz, 2H), 1.27 (t, *J* = 7.2 Hz, 3H). <sup>13</sup>C NMR (100 MHz, CDCl<sub>3</sub>) δ 162.8 (d, *J* = 245.6 Hz), 161.7, 144.6, 139.9, 139.1, 136.2, 134.0 (d, *J* = 8.3 Hz), 130.3, 130.2 (d, *J* = 8.4 Hz), 129.2, 128.6, 126.3 (d, *J* = 2.9 Hz), 122.9, 120.2, 117.6 (d, *J* = 21.6 Hz), 117.2 (d, *J* = 2.3 Hz), 115.5 (d, *J* = 20.8 Hz), 61.6, 14.0. HRMS (ESI): calcd for C<sub>19</sub>H<sub>14</sub>FN<sub>3</sub>O<sub>2</sub> ([M+H]<sup>+</sup>) 336.1143, found 336.1146.

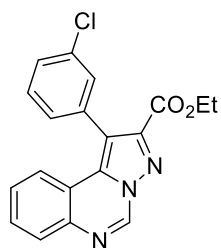

Ethyl 1-(3-chlorophenyl)pyrazolo[1,5-*c*]quinazoline-2-carboxylate (**3ka**)

Yellow solid; m.p. 114-116 °C; yield: 47.0 mg (67%); <sup>1</sup>H NMR (400 MHz, CDCl<sub>3</sub>) δ 9.20, (s, 1H), 7.98 (d, *J* = 8.0, 1H), 7.68-7.63 (m, 1H), 7.56-7.46 (m, 4H), 7.43-7.35 (m, 2H), 4.35 (q, *J* = 7.2 Hz, 2H), 1.27 (t, *J* = 7.2 Hz, 3H). <sup>13</sup>C NMR (100 MHz, CDCl<sub>3</sub>) δ 161.7, 144.7, 139.9, 139.1, 136.2, 134.5, 133.7, 130.6, 130.3, 129.9, 129.3, 128.7, 128.7, 128.6, 122.9, 120.1, 117.0, 61.6, 14.0. HRMS (ESI): calcd for C<sub>19</sub>H<sub>14</sub>ClN<sub>3</sub>O<sub>2</sub> ([M+H]<sup>+</sup>) 352.0847, found 352.0852.

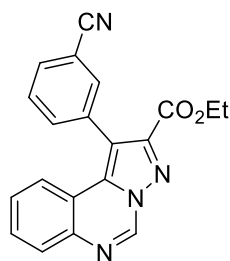

Ethyl 1-(3-cyanophenyl)pyrazolo[1,5-*c*]quinazoline-2-carboxylate (**3la**)

Yellow solid; m.p. 179-180 °C; yield: 39.0 mg (57%); <sup>1</sup>H NMR (400 MHz, CDCl<sub>3</sub>) δ 9.22 (s, 1H), 8.01 (d, *J* = 8.4 Hz, 1H), 7.83 (d, *J* = 7.6 Hz, 1H), 7.80 (s, 1H), 7.75 (d, *J* = 7.6 Hz, 1H), 7.72-7.66 (m, 2H), 7.42-7.40 (m, 2H), 4.36 (q, *J* = 7.2 Hz, 2H), 1.29 (t, *J* = 7.2 Hz, 3H). <sup>13</sup>C NMR (100 MHz, CDCl<sub>3</sub>) δ 161.5, 144.5, 140.0, 139.1, 136.4, 135.1, 134.1, 133.5, 132.1, 130.6, 129.6, 129.5, 128.8, 122.6, 119.9, 118.4, 116.0, 113.0, 61.8, 14.1. HRMS (ESI): calcd for C<sub>20</sub>H<sub>14</sub>N<sub>4</sub>O<sub>2</sub> ([M+H]<sup>+</sup>) 343.1190, found 343.1191.

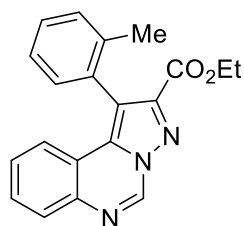

Ethyl 1-(*o*-tolyl)pyrazolo[1,5-*c*]quinazoline-2-carboxylate (**3ma**)

Yellow solid; m.p. 101-103 °C; yield: 39.8 mg (60%); <sup>1</sup>H NMR (400 MHz, CDCl<sub>3</sub>) δ

9.22 (s, 1H), 7.97 (d,  $J = 8.4$  Hz, 1H), 7.64-7.60 (m, 1H), 7.46-7.29 (m, 6H), 4.33 (q,  $J = 7.2$  Hz, 2H), 2.10 (s, 3H), 1.23 (t,  $J = 7.2$  Hz, 3H).  $^{13}\text{C}$  NMR (100 MHz,  $\text{CDCl}_3$ )  $\delta$  161.8, 144.8, 139.7, 139.3, 137.5, 136.0, 131.3, 130.4, 130.2, 130.1, 129.0, 128.8, 128.7, 126.2, 122.7, 120.6, 117.6, 61.5, 20.1, 14.0. HRMS (ESI): calcd for  $\text{C}_{20}\text{H}_{17}\text{N}_3\text{O}_2$  ( $[\text{M}+\text{H}]^+$ ) 332.1394, found 332.1398.

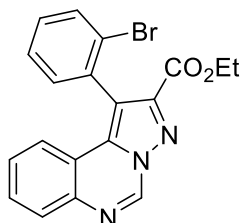

Ethyl 1-(2-bromophenyl)pyrazolo[1,5-*c*]quinazoline-2-carboxylate (**3na**)

Yellow solid; m.p. 110-111 °C; yield: 41.1 mg (52%);  $^1\text{H}$  NMR (400 MHz,  $\text{CDCl}_3$ )  $\delta$  9.22 (s, 1H), 7.99 (d,  $J = 8.0$  Hz, 1H), 7.80 (d,  $J = 8.0$  Hz, 1H), 7.65 (t,  $J = 7.2$  Hz, 1H), 7.51-7.34 (m, 5H), 4.37-4.30 (m, 2H) 1.23 (t,  $J = 7.2$  Hz, 3H).  $^{13}\text{C}$  NMR (100 MHz,  $\text{CDCl}_3$ )  $\delta$  161.6, 144.9, 139.9, 139.2, 136.3, 133.3, 133.0, 132.0, 130.3, 130.2, 129.1, 128.8, 127.7, 125.3, 122.9, 120.3, 117.2, 61.6, 13.9. HRMS (ESI): calcd for  $\text{C}_{19}\text{H}_{14}\text{BrN}_3\text{O}_2$  ( $[\text{M}+\text{H}]^+$ ) 396.0342, found 396.0347.

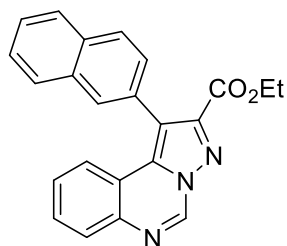

Ethyl 1-(naphthalen-2-yl)pyrazolo[1,5-*c*]quinazoline-2-carboxylate (**3oa**)

Yellow solid; m.p. 158-159 °C; yield: 41.1 mg (56%);  $^1\text{H}$  NMR (400 MHz,  $\text{CDCl}_3$ )  $\delta$  9.22 (s, 1H), 8.01 (d,  $J = 8.4$  Hz, 1H), 8.00-7.95 (m, 3H), 7.89-7.86 (m, 1H), 7.61-7.52 (m, 5H), 7.28-7.24 (m, 1H), 4.31 (q,  $J = 7.2$  Hz, 2H), 1.19 (t,  $J = 7.2$  Hz, 3H).  $^{13}\text{C}$  NMR (100 MHz,  $\text{CDCl}_3$ )  $\delta$  161.9, 144.9, 139.9, 139.3, 136.3, 133.4, 133.1, 130.1, 129.6, 129.2, 129.1, 128.6, 128.4, 128.3, 128.2, 127.9, 126.6, 126.4, 123.1, 120.5, 118.6, 61.6, 14.0. HRMS (ESI): calcd for  $\text{C}_{23}\text{H}_{17}\text{N}_3\text{O}_2$  ( $[\text{M}+\text{H}]^+$ ) 368.1394, found 368.1397.

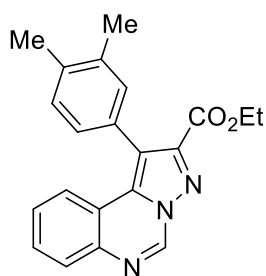

Ethyl 1-(3,4-dimethylphenyl)pyrazolo[1,5-*c*]quinazoline-2-carboxylate (**3pa**)

Yellow solid; m.p. 117-118 °C; yield: 26.2 mg (38%); <sup>1</sup>H NMR (400 MHz, CDCl<sub>3</sub>) δ 9.18 (s, 1H), 7.95 (dd, *J* = 1.2, 8.4 Hz, 1H), 7.63-7.59 (m, 2H), 7.39-7.35 (m, 1H), 7.28 (q, *J* = 8.0 Hz, 1H), 7.22 (m, 1H), 7.18 (dd, *J* = 2.0, 7.6 Hz, 1H), 4.36 (q, *J* = 7.2 Hz, 2H), 2.39 (s, 3H), 2.34 (s, 3H), 1.30 (t, *J* = 7.2 Hz, 3H). <sup>13</sup>C NMR (100 MHz, CDCl<sub>3</sub>) δ 162.0, 144.8, 139.8, 139.3, 136.8, 136.8, 136.1, 131.4, 130.0, 129.9, 129.0, 128.8, 128.4, 127.7, 123.1, 120.6, 119.0, 61.5, 19.9, 19.8, 14.1. HRMS (ESI): calcd for C<sub>21</sub>H<sub>19</sub>N<sub>3</sub>O<sub>2</sub> ([M+H]<sup>+</sup>) 346.1550, found 346.1554.

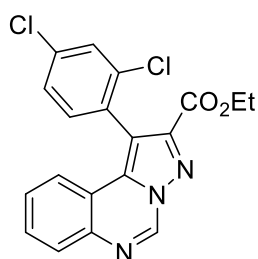

Ethyl 1-(2,4-dichlorophenyl)pyrazolo[1,5-*c*]quinazoline-2-carboxylate (**3qa**)

Yellow solid; m.p. 90-91 °C; yield: 27.0 mg (35%); <sup>1</sup>H NMR (400 MHz, CDCl<sub>3</sub>) δ 9.22 (s, 1H), 8.00 (d, *J* = 8.4 Hz, 1H), 7.70-7.64 (m, 2H), 7.47-7.38 (m, 4H), 4.41-4.33 (m, 2H), 1.29 (t, *J* = 7.2 Hz, 3H). <sup>13</sup>C NMR (100 MHz, CDCl<sub>3</sub>) δ 161.5, 144.8, 139.9, 139.1, 136.6, 135.8, 135.4, 132.9, 130.5, 129.8, 129.7, 129.2, 128.9, 127.5, 122.7, 120.1, 114.0, 61.7, 14.0. HRMS (ESI): calcd for C<sub>19</sub>H<sub>13</sub>Cl<sub>2</sub>N<sub>3</sub>O<sub>2</sub> ([M+H]<sup>+</sup>) 386.0458, found 386.0462.

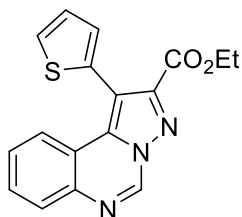

Ethyl 1-(thiophen-2-yl)pyrazolo[1,5-*c*]quinazoline-2-carboxylate (**3ra**)

Yellow solid; m.p. 138-140 °C; yield: 37.5 mg (58%); <sup>1</sup>H NMR (400 MHz, CDCl<sub>3</sub>) δ 9.18 (s, 1H), 7.97 (d, *J* = 8.4 Hz, 1H), 7.68-7.64 (m, 2H), 7.58 (dd, *J* = 5.2, 1.2 Hz, 1H), 7.43 (t, *J* = 7.6 Hz, 1H), 7.24 (dd, *J* = 5.2, 3.6 Hz, 1H), 7.18 (dd, *J* = 3.6, 1.2 Hz, 1H), 4.38 (q, *J* = 7.2 Hz, 2H), 1.30 (t, *J* = 7.2 Hz, 3H). <sup>13</sup>C NMR (100 MHz, CDCl<sub>3</sub>) δ 161.5, 145.8, 140.0, 139.0, 137.5, 131.5, 130.5, 129.1, 129.0, 128.7, 127.6, 127.5, 123.2, 120.1, 110.4, 61.6, 14.0. HRMS (ESI): calcd for C<sub>17</sub>H<sub>13</sub>N<sub>3</sub>O<sub>2</sub>S ([M+H]<sup>+</sup>) 324.0801, found 324.0805.

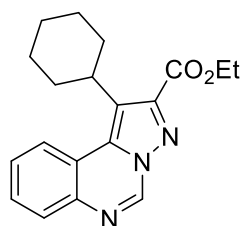

Ethyl 1-cyclohexylpyrazolo[1,5-*c*]quinazoline-2-carboxylate (**3sa**)

Yellow solid; m.p. 103-104 °C; yield: 24.6 mg (38%); <sup>1</sup>H NMR (400 MHz, CDCl<sub>3</sub>) δ 9.08 (s, 1H), 8.35-8.33 (m, 1H), 7.99-7.97 (m, 1H), 7.70-7.65 (m, 2H), 4.52 (q, *J* = 7.2 Hz, 2H), 3.63-3.57 (m, 1H), 2.22-2.12 (m, 2H), 1.96-1.82 (m, 5H), 1.53-1.45 (m, 6H). <sup>13</sup>C NMR (100 MHz, CDCl<sub>3</sub>) δ 163.6, 145.6, 140.1, 139.6, 134.9, 129.4, 128.4, 123.7, 123.2, 121.2, 61.9, 35.5, 30.6, 27.1, 25.8, 14.3. HRMS (ESI): calcd for C<sub>19</sub>H<sub>21</sub>N<sub>3</sub>O<sub>2</sub> ([M+H]<sup>+</sup>) 324.1707, found 324.1710.

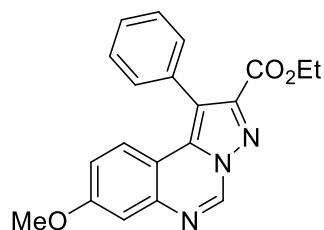

Ethyl 8-methoxy-1-phenylpyrazolo[1,5-*c*]quinazoline-2-carboxylate (**3ta**)

Yellow solid; m.p. 184-185 °C; yield: 42.4 mg (61%); <sup>1</sup>H NMR (400 MHz, CDCl<sub>3</sub>) δ 9.16 (s, 1H), 7.52-7.37 (m, 7H), 6.97-6.94 (m, 1H), 4.33 (q, *J* = 7.2 Hz, 2H), 3.90 (s, 3H), 1.25 (t, *J* = 7.2 Hz, 3H). <sup>13</sup>C NMR (100 MHz, CDCl<sub>3</sub>) δ 162.0, 161.0, 144.9, 141.7, 139.6, 136.4, 131.9, 130.5, 128.6, 128.3, 124.1, 118.1, 117.1, 114.0, 110.4, 61.4, 55.6, 14.0. HRMS (ESI): calcd for C<sub>20</sub>H<sub>17</sub>N<sub>3</sub>O<sub>3</sub> ([M+H]<sup>+</sup>) 348.1343, found. 348.1345.

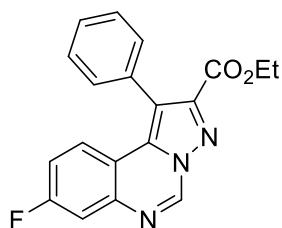

Ethyl 8-fluoro-1-phenylpyrazolo[1,5-*c*]quinazoline-2-carboxylate (**3ua**)

Yellow solid; m.p. 159-160 °C; yield: 40.4 mg (60%); <sup>1</sup>H NMR (400 MHz, CDCl<sub>3</sub>) δ 9.20 (s, 1H), 7.62 (dd, *J* = 2.8, 9.2 Hz, 1H), 7.56-7.50 (m, 4H), 7.47-7.44 (m, 2H), 7.13-7.08 (m, 1H), 4.34 (q, *J* = 7.2 Hz, 2H), 1.25 (t, *J* = 7.2 Hz, 3H). <sup>13</sup>C NMR (100 MHz, CDCl<sub>3</sub>) δ 163.1 (d, *J* = 249.7 Hz), 161.8, 145.1, 141.6 (d, *J* = 11.8 Hz), 140.2, 135.8, 131.5, 130.3, 128.8, 128.6, 124.9 (d, *J* = 9.3 Hz), 118.2, 117.2 (d, *J* = 2.6 Hz), 117.1 (d, *J* = 23.3 Hz), 114.7 (d, *J* = 21.9 Hz), 61.6, 14.0. HRMS (ESI): calcd for C<sub>19</sub>H<sub>14</sub>FN<sub>3</sub>O<sub>2</sub> ([M+H]<sup>+</sup>) 336.1143, found 336.1149.

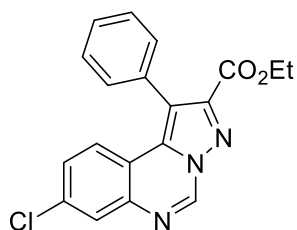

Ethyl 8-chloro-1-phenylpyrazolo[1,5-*c*]quinazoline-2-carboxylate (**3va**)

Yellow solid; m.p. 158-159 °C; yield: 42.8 mg (61%); <sup>1</sup>H NMR (400 MHz, CDCl<sub>3</sub>) δ 9.17 (s, 1H), 7.92 (d, *J* = 2.0 Hz, 1H), 7.55-7.51 (m, 3H), 7.46-7.43 (m, 3H), 7.30 (dd, *J* = 2.0, 8.8 Hz, 1H), 4.34 (q, *J* = 7.2 Hz, 2H), 1.25 (t, *J* = 7.2 Hz, 3H). <sup>13</sup>C NMR (100 MHz, CDCl<sub>3</sub>) δ 161.7, 145.1, 140.7, 140.1, 135.8, 135.6, 131.4, 130.3, 128.9, 128.7, 128.6, 128.5, 124.0, 118.9, 118.7, 61.6, 14.0. HRMS (ESI): calcd for C<sub>19</sub>H<sub>14</sub>ClN<sub>3</sub>O<sub>2</sub> ([M+H]<sup>+</sup>) 352.0847, found. 352.0846.

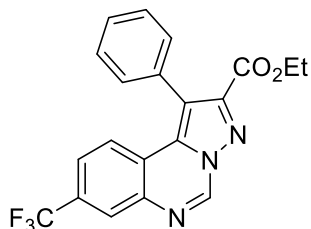

Ethyl 1-phenyl-8-(trifluoromethyl)pyrazolo[1,5-*c*]quinazoline-2-carboxylate (**3wa**)

Yellow solid; m.p. 130-131 °C; yield: 32.8 mg (43%); <sup>1</sup>H NMR (400 MHz, CDCl<sub>3</sub>) δ 9.25 (s, 1H), 8.23 (s, 1H), 7.64 (d, *J* = 8.4 Hz, 1H), 7.59-7.53 (m, 4H), 7.47-7.44 (m,

2H), 4.35 (q,  $J = 7.2$  Hz, 2H), 1.25 (t,  $J = 7.2$  Hz, 3H).  $^{13}\text{C}$  NMR (100 MHz,  $\text{CDCl}_3$ )  $\delta$  161.6, 145.2, 140.3, 139.6, 135.3, 131.5 (q,  $J = 33.2$  Hz), 131.1, 130.2, 128.8, 128.7, 126.4 (q,  $J = 4.1$  Hz), 124.7 (q,  $J = 3.4$  Hz), 123.8, 123.4 (q,  $J = 271.0$  Hz), 123.0, 119.8, 61.7, 14.0. HRMS (ESI): calcd for  $\text{C}_{20}\text{H}_{14}\text{F}_3\text{N}_3\text{O}_2$  ( $[\text{M}+\text{H}]^+$ ) 386.1111, found. 386.1113.

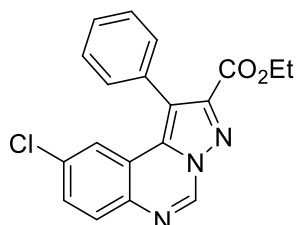

Ethyl 9-chloro-1-phenylpyrazolo[1,5-*c*]quinazoline-2-carboxylate (**3xa**)

Yellow solid; m.p. 129-130 °C; yield: 35.2 mg (50%);  $^1\text{H}$  NMR (400 MHz,  $\text{CDCl}_3$ )  $\delta$  9.16 (s, 1H), 7.88 (d,  $J = 8.8$  Hz, 1H), 7.57-7.53 (m, 4H), 7.46-7.44 (m, 3H), 4.34 (q,  $J = 7.2$  Hz, 2H), 1.25 (t,  $J = 7.2$  Hz, 3H).  $^{13}\text{C}$  NMR (100 MHz,  $\text{CDCl}_3$ )  $\delta$  161.7, 145.0, 139.3, 138.3, 135.0, 134.3, 131.0, 130.5, 130.2, 128.8, 128.7, 122.5, 121.5, 119.2, 61.6, 14.0. HRMS (ESI): calcd for  $\text{C}_{19}\text{H}_{14}\text{ClN}_3\text{O}_2$  ( $[\text{M}+\text{H}]^+$ ) 352.0847, found. 352.0844.

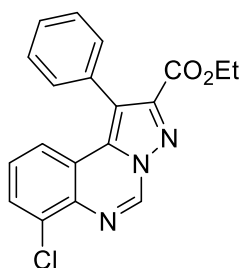

Ethyl 7-chloro-1-phenylpyrazolo[1,5-*c*]quinazoline-2-carboxylate (**3ya**)

Yellow solid; m.p. 153-154 °C; yield: 40.7 mg (58%);  $^1\text{H}$  NMR (400 MHz,  $\text{CDCl}_3$ )  $\delta$  9.30 (s, 1H), 7.70 (dd,  $J = 1.2, 8.0$  Hz, 1H), 7.55-7.52 (m, 3H), 7.46-7.44 (m, 3H), 7.29-7.25 (m, 1H), 4.34 (q,  $J = 7.2$  Hz, 2H), 1.25 (t,  $J = 7.2$  Hz, 3H).  $^{13}\text{C}$  NMR (100 MHz,  $\text{CDCl}_3$ )  $\delta$  161.6, 145.4, 139.7, 136.5, 135.5, 133.6, 131.3, 130.6, 130.3, 128.8, 128.7, 128.6, 122.2, 121.7, 119.3, 61.6, 14.0. HRMS (ESI): calcd for  $\text{C}_{19}\text{H}_{14}\text{ClN}_3\text{O}_2$  ( $[\text{M}+\text{H}]^+$ ) 352.0847, found. 352.0850.



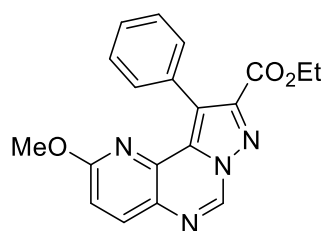

Ethyl 2-methoxy-10-phenylpyrazolo[1,5-*c*]pyrido[2,3-*e*]pyrimidine-9-carboxylate (**3za**)

Yellow solid; m.p. 167-168 °C; yield: 43.2 mg (62%); <sup>1</sup>H NMR (400 MHz, CDCl<sub>3</sub>) δ 9.16 (s, 1H), 8.07 (d, *J* = 9.2 Hz, 1H), 7.56-7.53 (m, 2H), 7.45-7.36 (m, 3H), 6.97 (d, *J* = 8.8 Hz, 1H), 4.38 (q, *J* = 7.2 Hz, 2H), 3.50 (s, 3H), 1.29 (t, *J* = 7.2 Hz, 3H). <sup>13</sup>C NMR (100 MHz, CDCl<sub>3</sub>) δ 163.0, 162.0, 144.8, 138.8, 137.6, 136.4, 136.2, 131.7, 131.3, 131.2, 127.5, 127.2, 119.5, 114.4, 61.6, 54.2, 14.0. HRMS (ESI): calcd for C<sub>19</sub>H<sub>16</sub>N<sub>4</sub>O<sub>3</sub> ([M+H]<sup>+</sup>) 349.1295, found. 342.1293.

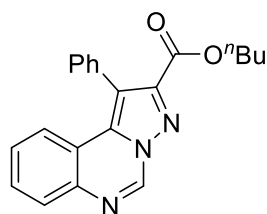

Prop-2-yn-1-yl 1-phenylpyrazolo[1,5-*c*]quinazoline-2-carboxylate (**3ab**)

Yellow solid; m.p. 96-97 °C; yield: 57.3 mg (83%); <sup>1</sup>H NMR (400 MHz, CDCl<sub>3</sub>) δ 9.19 (s, 1H), 7.95 (dd, *J* = 1.2, 8.4 Hz, 1H), 7.63-7.58 (m, 1H), 7.55-7.45 (m, 6H), 7.36-7.32 (m, 1H), 4.26 (t, *J* = 6.8 Hz, 2H), 1.58-1.51 (m, 2H), 1.25-1.16 (m, 2H), 0.86 (t, *J* = 7.2 Hz, 3H). <sup>13</sup>C NMR (100 MHz, CDCl<sub>3</sub>) δ 162.1, 144.9, 139.8, 139.2, 136.1, 131.9, 130.4, 130.0, 129.1, 128.7, 128.5, 128.4, 123.0, 120.5, 118.4, 65.4, 30.4, 19.0, 13.7. HRMS (ESI): calcd for C<sub>21</sub>H<sub>19</sub>N<sub>3</sub>O<sub>2</sub> ([M+H]<sup>+</sup>) 346.1550, found 346.1554.

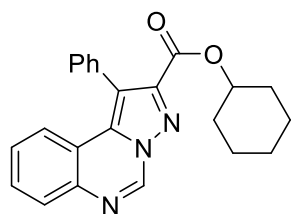

Cyclohexyl 1-phenylpyrazolo[1,5-*c*]quinazoline-2-carboxylate (**3ac**)

Yellow solid; m.p. 143-144 °C; yield: 49.7 mg (67%); <sup>1</sup>H NMR (400 MHz, CDCl<sub>3</sub>) δ 9.20 (s, 1H), 7.95 (d, *J* = 8.4 Hz, 1H), 7.63-7.59 (m, 1H), 7.54-7.44 (m, 6H), 7.34 (t, *J*

= 7.6 Hz, 1H), 5.01-4.95 (m, 1H), 1.84-1.79 (m, 2H), 1.57-1.46 (m, 3H), 1.38-1.26 (m, 4H), 1.21-1.14 (m, 1H). <sup>13</sup>C NMR (100 MHz, CDCl<sub>3</sub>) δ 161.6, 145.4, 139.8, 139.3, 136.1, 132.1, 130.4, 130.0, 129.1, 128.7, 128.4, 128.3, 123.0, 120.5, 118.3, 74.2, 31.3, 25.2, 23.5. HRMS (ESI): calcd for C<sub>23</sub>H<sub>21</sub>N<sub>3</sub>O<sub>2</sub> ([M+H]<sup>+</sup>) 372.1707, found 372.1711.

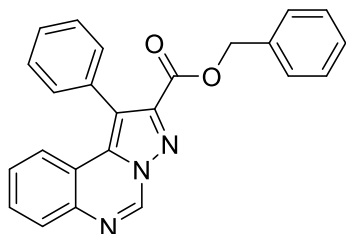

**Benzyl 1-phenylpyrazolo[1,5-*c*]quinazoline-2-carboxylate (3ad)**

Yellow solid; m.p. 115-116 °C; yield: 56.9 mg (75%); <sup>1</sup>H NMR (400 MHz, CDCl<sub>3</sub>) δ 9.18 (s, 1H), 7.95 (d, *J* = 8.0 Hz, 1H), 7.63-7.59 (m, 1H), 7.51-7.47 (m, 4H), 7.46-7.42 (m, 2H), 7.36-7.32 (m, 1H), 7.30-7.27 (m, 3H), 7.18-7.15 (m, 2H), 5.31 (s, 2H). <sup>13</sup>C NMR (100 MHz, CDCl<sub>3</sub>) δ 161.9, 144.5, 139.8, 139.2, 136.2, 135.1, 131.7, 130.4, 130.1, 129.1, 128.9, 128.8, 128.5, 128.4, 128.2, 123.0, 120.5, 118.6, 67.1. HRMS (ESI): calcd for C<sub>24</sub>H<sub>17</sub>N<sub>3</sub>O<sub>2</sub> ([M+H]<sup>+</sup>) 380.1394, found 380.1398.

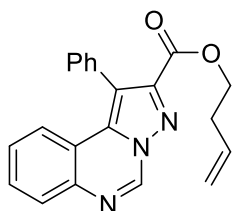

**But-3-en-1-yl 1-phenylpyrazolo[1,5-*c*]quinazoline-2-carboxylate (3ae)**

Yellow solid; m.p. 111-112 °C; yield: 50.1 mg (73%); <sup>1</sup>H NMR (400 MHz, CDCl<sub>3</sub>) δ 9.19 (s, 1H), 7.95 (dd, *J* = 1.6, 8.4 Hz, 1H), 7.63-7.59 (m, 1H), 7.55-7.50 (m, 4H), 7.49-7.44 (m, 2H), 7.37-7.33 (m, 1H), 5.69-5.58 (m, 1H), 5.08-5.00 (m, 2H), 4.32 (t, *J* = 6.8 Hz, 2H), 2.37-2.32 (m, 2H). <sup>13</sup>C NMR (100 MHz, CDCl<sub>3</sub>) δ 162.0, 144.7, 139.8, 139.2, 136.2, 133.6, 131.8, 130.4, 130.1, 129.1, 128.7, 128.5, 128.4, 123.0, 120.5, 118.5, 117.4, 64.6, 32.8. HRMS (ESI): calcd for C<sub>21</sub>H<sub>17</sub>N<sub>3</sub>O<sub>2</sub> ([M+H]<sup>+</sup>) 344.1394, found 344.1391.

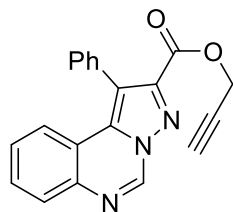

Prop-2-yn-1-yl 1-phenylpyrazolo[1,5-*c*]quinazoline-2-carboxylate (**3af**)

Yellow solid; m.p. 128-129 °C; yield: 39.9 mg (61%); <sup>1</sup>H NMR (400 MHz, CDCl<sub>3</sub>) δ 9.10 (s, 1H), 7.87 (d, *J* = 8.0 Hz, 1H), 7.55-7.51 (m, 1H), 7.48-7.43 (m, 4H), 7.41-7.37 (m, 2H), 7.29-7.25 (m, 1H), 4.80 (d, *J* = 2.4 Hz, 2H), 2.39 (d, *J* = 2.4 Hz, 1H). <sup>13</sup>C NMR (100 MHz, CDCl<sub>3</sub>) δ 161.0, 143.7, 139.8, 139.1, 136.2, 131.2, 130.4, 130.2, 129.1, 128.8, 128.6, 128.5, 123.0, 120.4, 119.1, 75.6, 52.8. HRMS (ESI): calcd for C<sub>20</sub>H<sub>13</sub>N<sub>3</sub>O<sub>2</sub> ([M+H]<sup>+</sup>) 328.1081, found 328.1084.

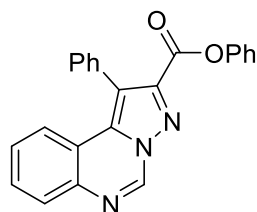

Phenyl 1-phenylpyrazolo[1,5-*c*]quinazoline-2-carboxylate (**3ag**)

Yellow solid; m.p. 100-102 °C; yield: 19.7 mg (27%); <sup>1</sup>H NMR (400 MHz, CDCl<sub>3</sub>) δ 9.25 (s, 1H), 7.99 (d, *J* = 8.0 Hz, 1H), 7.67-7.63 (m, 1H), 7.58 (dd, *J* = 8.0, 1.2 Hz, 1H), 7.54-7.48 (m, 5H), 7.40-7.33 (m, 3H), 7.24-7.20 (m, 1H), 7.14-7.12 (m, 2H). <sup>13</sup>C NMR (100 MHz, CDCl<sub>3</sub>) δ 160.3, 150.3, 144.0, 139.8, 139.2, 136.4, 131.4, 130.4, 130.3, 129.4, 129.2, 128.8, 128.7, 128.6, 126.1, 123.1, 121.5, 120.4, 119.3. HRMS (ESI): calcd for C<sub>23</sub>H<sub>15</sub>N<sub>3</sub>O<sub>2</sub> ([M+H]<sup>+</sup>) 366.1237, found 366.1242.

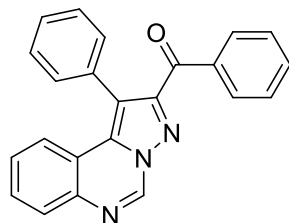

Phenyl(1-phenylpyrazolo[1,5-*c*]quinazolin-2-yl)methanone (**3ah**)

Yellow solid; m.p. 130-131 °C; yield: 44.7 mg (64%); <sup>1</sup>H NMR (400 MHz, CDCl<sub>3</sub>) δ 9.16 (s, 1H), 8.14-8.11 (m, 2H), 7.97 (dd, *J* = 1.2, 8.4 Hz, 1H), 7.70 (dd, *J* = 1.2, 8.4 Hz, 1H), 7.65-7.57 (m, 2H), 7.51-7.45 (m, 7H), 7.39-7.35 (m, 1H). <sup>13</sup>C NMR (100

MHz, CDCl<sub>3</sub>)  $\delta$  189.2, 151.0, 140.0, 139.4, 137.0, 135.6, 133.5, 131.5, 130.7, 130.4, 130.1, 129.1, 128.8, 128.4, 128.3 (2C), 123.1, 120.6, 118.5, HRMS (ESI): calcd for C<sub>23</sub>H<sub>15</sub>N<sub>3</sub>O ([M+H]<sup>+</sup>) 350.1288, found 350.1294.

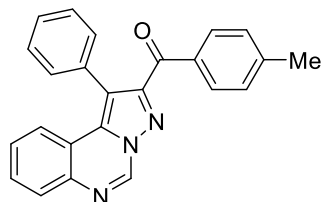

Phenylpyrazolo[1,5-*c*]quinazolin-2-yl(*p*-tolyl)methanone (**3ai**)

Yellow solid; m.p. 153-154 °C; yield: 45.8 mg (63%); <sup>1</sup>H NMR (400 MHz, CDCl<sub>3</sub>)  $\delta$  9.15 (s, 1H), 8.02 (d, *J* = 8.0 Hz, 2H), 7.96 (dd, *J* = 1.2, 8.0 Hz, 1H), 7.70 (dd, *J* = 1.6, 8.0 Hz, 1H), 7.64-7.60 (m, 1H), 7.52-7.44 (m, 6H), 7.39-7.34 (m, 1H), 7.28-7.27 (m, 1H), 2.41 (s, 3H). <sup>13</sup>C NMR (100 MHz, CDCl<sub>3</sub>)  $\delta$  188.9, 151.3, 144.5, 140.0, 139.5, 135.5, 134.5, 131.6, 130.8, 130.4, 130.1, 129.1, 129.0, 128.8, 128.4, 128.3, 123.1, 120.6, 118.3, 21.8. HRMS (ESI): calcd for C<sub>24</sub>H<sub>17</sub>N<sub>3</sub>O ([M+H]<sup>+</sup>) 364.1444, found 364.1448.

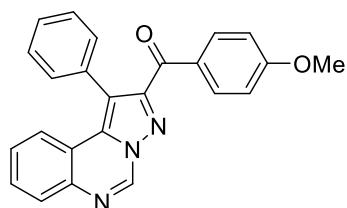

(4-Methoxyphenyl)(1-phenylpyrazolo[1,5-*c*]quinazolin-2-yl)methanone (**3aj**)

Yellow solid; m.p. 191-192 °C; yield: 46.3 mg (61%); <sup>1</sup>H NMR (400 MHz, CDCl<sub>3</sub>)  $\delta$  9.16 (s, 1H), 8.13 (d, *J* = 8.8 Hz, 2H), 7.97 (d, *J* = 8.0 Hz, 1H), 7.70 (dd, *J* = 8.0, 1.2 Hz, 1H), 7.64-7.60 (m, 1H), 7.51-7.49 (m, 5H), 7.39-7.35 (m, 1H), 6.94 (d, *J* = 8.8 Hz, 2H), 3.87 (s, 3H). <sup>13</sup>C NMR (100 MHz, CDCl<sub>3</sub>)  $\delta$  187.6, 164.0, 151.5, 140.0, 139.4, 135.5, 133.1, 131.6, 130.4, 130.1, 129.9, 129.0, 128.8, 128.3, 128.2, 123.1, 120.6, 118.2, 113.7, 55.6. HRMS (ESI): calcd for C<sub>24</sub>H<sub>17</sub>N<sub>3</sub>O<sub>2</sub> ([M+H]<sup>+</sup>) 380.1394, found 380.1397.

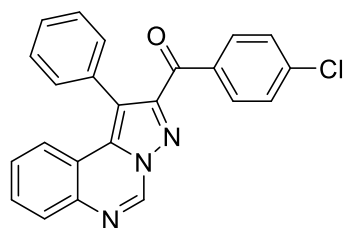

(4-Chlorophenyl)(1-phenylpyrazolo[1,5-*c*]quinazolin-2-yl)methanone (**3ak**)

Yellow solid; m.p. 138-140 °C; yield: 56.7 mg (74%); <sup>1</sup>H NMR (400 MHz, CDCl<sub>3</sub>) δ 9.15 (s, 1H), 8.11 (d, *J* = 8.8 Hz, 2H), 7.97 (dd, *J* = 8.0, 1.2 Hz, 1H), 7.68-7.61 (m, 2H), 7.50-7.48 (m, 5H), 7.44 (d, *J* = 8.8 Hz, 2H), 7.40-7.36 (m, 1H). <sup>13</sup>C NMR (100 MHz, CDCl<sub>3</sub>) δ 187.7, 150.5, 140.0, 139.9, 139.3, 135.7, 135.3, 132.1, 131.5, 130.4, 130.2, 129.1, 128.9, 128.7, 128.5, 128.4, 123.1, 120.5, 118.6. HRMS (ESI): calcd for C<sub>23</sub>H<sub>14</sub>ClN<sub>3</sub>O ([M+H]<sup>+</sup>) 384.0898, found 384.0903.

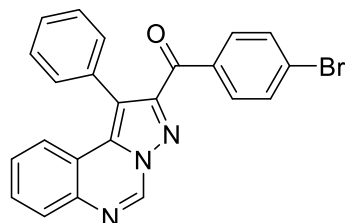

(4-Bromophenyl)(1-phenylpyrazolo[1,5-*c*]quinazolin-2-yl)methanone (**3al**)

Yellow solid; m.p. 133-135 °C; yield: 71.7 mg (84%); <sup>1</sup>H NMR (400 MHz, CDCl<sub>3</sub>) δ 9.14 (s, 1H), 8.03 (d, *J* = 8.4 Hz, 2H), 7.97 (d, *J* = 8.0 Hz, 1H), 7.68-7.62 (m, 2H), 7.61-7.59 (m, 2H), 7.50-7.48 (m, 5H), 7.39-7.35 (m, 1H). <sup>13</sup>C NMR (100 MHz, CDCl<sub>3</sub>) δ 187.9, 150.4, 140.0, 139.3, 135.7, 135.7, 132.2, 131.7, 131.5, 130.4, 130.2, 129.1, 128.9, 128.8, 128.5, 128.4, 123.1, 120.2, 118.6. HRMS (ESI): calcd for C<sub>23</sub>H<sub>14</sub>BrN<sub>3</sub>O ([M+H]<sup>+</sup>) 428.0393, found 428.0397.

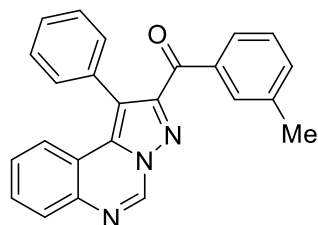

Phenylpyrazolo[1,5-*c*]quinazolin-2-yl(*m*-tolyl)methanone (**3am**)

Yellow solid; m.p. 108-109 °C; yield: 58.1 mg (80%); <sup>1</sup>H NMR (400 MHz, CDCl<sub>3</sub>) δ 9.16 (s, 1H), 7.97 (d, *J* = 8.0 Hz, 1H), 7.91 (d, *J* = 7.6 Hz, 1H), 7.88 (s, 1H), 7.72 (d, *J* = 8.0 Hz, 1H), 7.62 (t, *J* = 7.6 Hz, 1H), 7.50-7.43 (m, 5H), 7.40-7.33 (m, 3H), 2.39 (s,

3H).  $^{13}\text{C}$  NMR (100 MHz,  $\text{CDCl}_3$ )  $\delta$  189.5, 151.3, 140.0, 139.5, 138.1, 136.9, 135.5, 134.4, 131.6, 131.0, 130.5, 130.1, 129.1, 128.8, 128.4, 128.3, 128.2, 128.0, 123.1, 120.6, 118.3, 21.4. HRMS (ESI): calcd for  $\text{C}_{24}\text{H}_{17}\text{N}_3\text{O}$  ( $[\text{M}+\text{H}]^+$ ) 364.1444 found 364.1450.

#### 4. Derivatization of Product

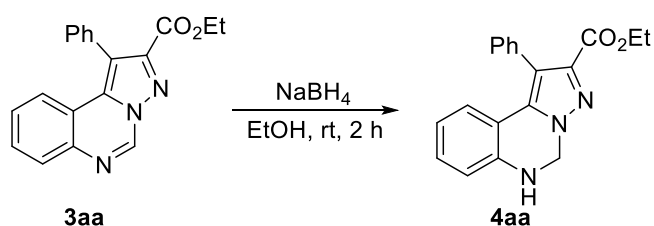

A solution of **3aa** (0.2 mmol, 63.4 mg),  $\text{NaBH}_4$  (0.24 mmol, 38.0 mg, 1.2 equiv.) in  $\text{EtOH}$  (1.0 mL) was stirred at room temperature for 12 h. After the reaction was complete (monitored by TLC). Then the mixture was quenched by water. The reaction mixture was extracted with  $\text{CH}_2\text{Cl}_2$  (10 mL  $\times$  3). The combined organic extracts were dried over anhydrous  $\text{Na}_2\text{SO}_4$ , filtered, and concentrated under reduced pressure to yield the corresponding product **4aa** (46.0 mg, 72%) as a white solid.

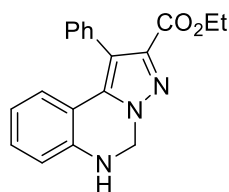

Ethyl 1-phenyl-5,6-dihydropyrazolo[1,5-c]quinazoline-2-carboxylate (**4aa**)

White solid; m.p. 184-185  $^\circ\text{C}$ ; yield: 46.0 mg (72%);  $^1\text{H}$  NMR (400 MHz,  $\text{CDCl}_3$ )  $\delta$  7.45-7.34 (m, 5H), 7.12-7.08 (m, 1H), 6.93 (dd,  $J = 8.0, 1.6$  Hz, 1H), 6.80 (dd,  $J = 8.0, 1.2$  Hz, 1H), 6.66-6.62 (m, 1H), 5.47 (s, 2H), 4.57 (br, 1H), 4.25 (q,  $J = 7.2$  Hz, 2H), 1.19 (t,  $J = 7.2$  Hz, 3H).  $^{13}\text{C}$  NMR (100 MHz,  $\text{CDCl}_3$ )  $\delta$  162.3, 141.1, 140.9, 135.0, 132.6, 130.3, 129.5, 128.3, 127.7, 124.6, 120.7, 120.6, 116.4, 115.5, 60.8, 60.5, 14.1. HRMS (ESI): calcd for  $\text{C}_{19}\text{H}_{17}\text{N}_3\text{O}_2$  ( $[\text{M}+\text{H}]^+$ ) 320.1394 found 320.1397.

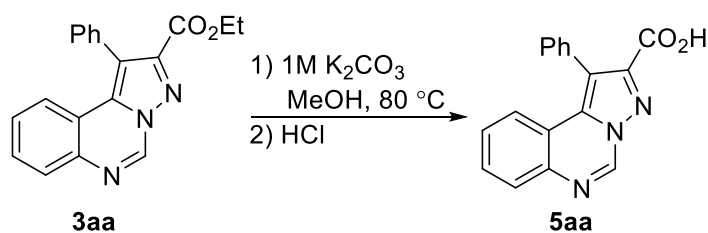

To a solution of **3aa** (0.2 mmol, 63.4 mg) in 0.6 mL of methanol was added  $\text{K}_2\text{CO}_3$  aq (0.6 mL, 1M). The reaction mixture was heated to reflux at  $80^\circ\text{C}$ . After 4 h, the reaction mixture was cooled to room temperature. Then the mixture was quenched by solution of HCl (6.0 M, 1 mL). The reaction mixture was extracted with  $\text{CH}_2\text{Cl}_2$  (10 mL  $\times$  3). The combined organic extracts were dried over anhydrous  $\text{Na}_2\text{SO}_4$ , filtered, and concentrated under reduced pressure to yield the corresponding product **5aa** (53.8 mg, 93%) as a white solid

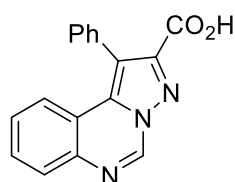

#### 1-Phenylpyrazolo[1,5-*c*]quinazoline-2-carboxylic acid (**5aa**)

White solid; m.p.  $254\text{--}255^\circ\text{C}$ ; yield: 53.8 mg (93%);  $^1\text{H}$  NMR (400 MHz,  $\text{DMSO-}d_6$ )  $\delta$  13.31 (br, 1H), 9.48 (s, 1H), 7.94 (d,  $J = 8.0$  Hz, 1H), 7.70-7.66 (m, 1H), 7.58-7.52 (m, 3H), 7.51-7.48 (m, 2H), 7.47-7.43 (m, 1H), 7.40 (dd,  $J = 8.0, 1.6$  Hz, 1H).  $^{13}\text{C}$  NMR (100 MHz,  $\text{DMSO-}d_6$ )  $\delta$  163.4, 145.6, 140.6, 139.8, 135.4, 132.3, 130.8, 130.6, 129.2, 129.0, 128.7, 128.6, 122.5, 120.3, 117.9. HRMS (ESI): calcd for  $\text{C}_{17}\text{H}_{11}\text{N}_3\text{O}_2$  ( $[\text{M}+\text{H}]^+$ ) 290.0924 found 290.0929.

## 5. Control Experiment

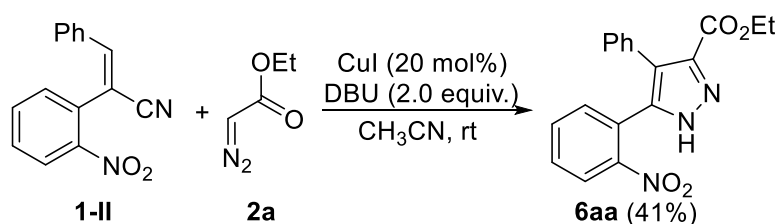

A solution of **1-II** (0.2 mmol, 50.0 mg), **2a** (0.3 mmol, 0.037 mL), CuI (20 mol %), and DBU (0.4 mmol, 0.062 mL) in CH<sub>3</sub>CN (1.0 mL) was stirred at room temperature for 1 h. After the reaction was complete (monitored by TLC), the solvent was removed under reduced pressure. The crude residue was purified by silica gel column chromatography (EtOAc/petroleum ether = 1:3, V/V) to afford pure product **6aa** (27.6 mg, 41%) as a yellow solid.

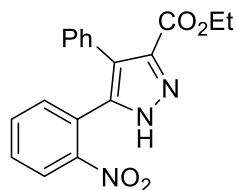

Ethyl 5-(2-nitrophenyl)-4-phenyl-1*H*-pyrazole-3-carboxylate (**6aa**)

Yellow solid; m.p. 177-178 °C; yield: 27.6 mg (41%); <sup>1</sup>H NMR (400 MHz, CDCl<sub>3</sub>) δ 11.82 (br, 1H), 7.82-7.80 (m, 1H), 7.51 (td, *J* = 7.6, 1.6 Hz, 1H), 7.44 (td, *J* = 7.6, 1.6 Hz, 1H), 7.36 (dd, *J* = 7.6, 1.6 Hz, 1H), 7.26-7.23 (m, 3H), 7.22-7.19 (m, 2H), 4.29 (q, *J* = 7.2 Hz, 2H), 1.22 (t, *J* = 7.2 Hz, 3H). <sup>13</sup>C NMR (100 MHz, CDCl<sub>3</sub>) δ 159.6, 149.5, 132.7, 132.5, 130.4, 130.3, 129.2, 127.9, 127.6, 124.3, 124.3, 61.4, 13.9. HRMS (ESI): calcd for C<sub>18</sub>H<sub>15</sub>N<sub>3</sub>O<sub>4</sub> ([M+H]<sup>+</sup>) 338.1135 found 338.1139.



## 6. Crystal structure of 3aa

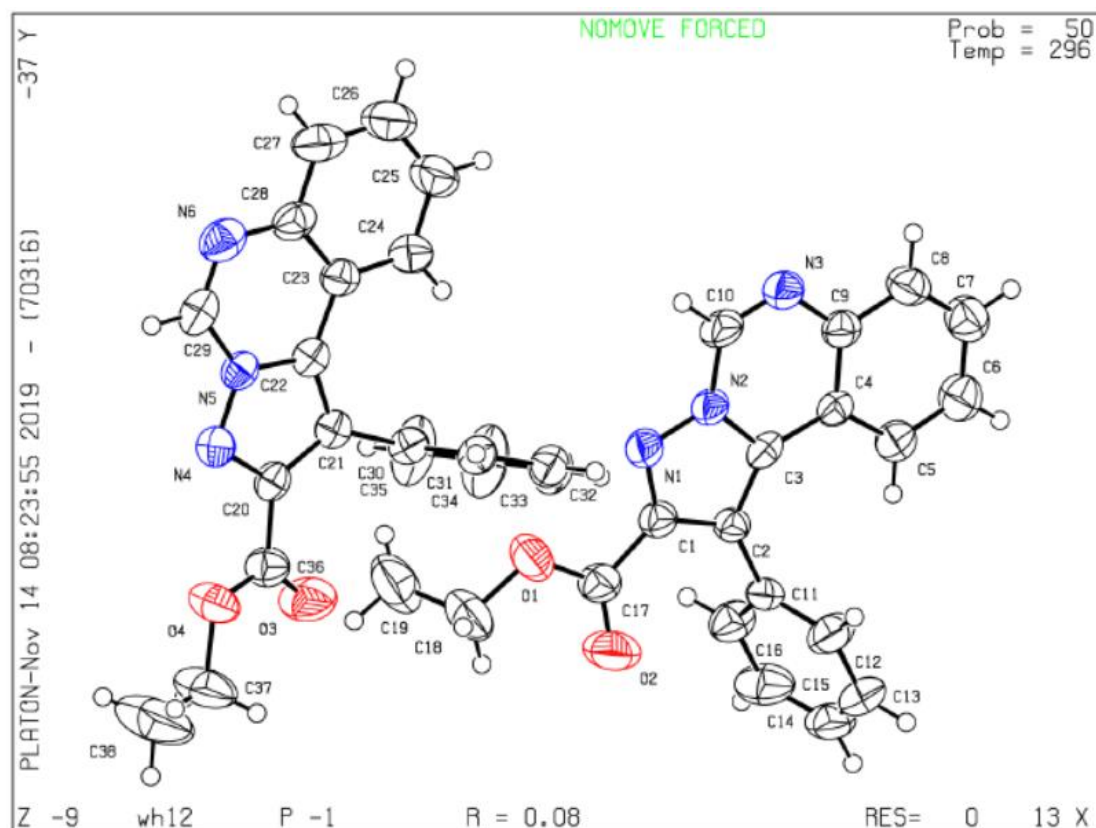

**Table 1. Single crystal data for wh12.**

|                             |                            |                             |
|-----------------------------|----------------------------|-----------------------------|
| <b>Identification code</b>  | wh12                       |                             |
| <b>Chemical formula</b>     | $C_{38}H_{30}N_6O_4$       |                             |
| <b>Formula weight</b>       | 634.68 g/mol               |                             |
| <b>Temperature</b>          | 296(2) K                   |                             |
| <b>Wavelength</b>           | 0.71073 Å                  |                             |
| <b>Crystal size</b>         | 0.260 x 0.280 x 0.280 mm   |                             |
| <b>Crystal habit</b>        | colorless block            |                             |
| <b>Crystal system</b>       | triclinic                  |                             |
| <b>Space group</b>          | P -1                       |                             |
| <b>Unit cell dimensions</b> | $a = 9.346(2)$ Å           | $\alpha = 104.993(9)^\circ$ |
|                             | $b = 12.963(3)$ Å          | $\beta = 99.436(10)^\circ$  |
|                             | $c = 13.931(4)$ Å          | $\gamma = 97.900(9)^\circ$  |
| <b>Volume</b>               | $1579.3(7)$ Å <sup>3</sup> |                             |
| <b>Z</b>                    | 2                          |                             |
| <b>Density (calculated)</b> | 1.335 g/cm <sup>3</sup>    |                             |

|                               |                        |
|-------------------------------|------------------------|
| <b>Absorption coefficient</b> | 0.089 mm <sup>-1</sup> |
| <b>F(000)</b>                 | 664                    |

**Table 2. Data collection and structure refinement for wh12.**

|                                     |                                                                                             |
|-------------------------------------|---------------------------------------------------------------------------------------------|
| Theta range for data collection     | 2.25 to 25.19°                                                                              |
| Index ranges                        | -11<=h<=11, -15<=k<=15, -16<=l<=16                                                          |
| Reflections collected               | 18650                                                                                       |
| Independent reflections             | 5598 [R(int) = 0.0911]                                                                      |
| Coverage of independent reflections | 98.4%                                                                                       |
| Absorption correction               | Multi-Scan                                                                                  |
| Max. and min. transmission          | 0.9770 and 0.9750                                                                           |
| Structure solution technique        | direct methods                                                                              |
| Structure solution program          | SHELXT 2014/5 (Sheldrick, 2014)                                                             |
| Refinement method                   | Full-matrix least-squares on F <sup>2</sup>                                                 |
| Refinement program                  | SHELXL-2017/1 (Sheldrick, 2017)                                                             |
| Function minimized                  | $\Sigma w(F_o^2 - F_c^2)^2$                                                                 |
| Data / restraints / parameters      | 5598 / 0 / 435                                                                              |
| Goodness-of-fit on F <sup>2</sup>   | 1.037                                                                                       |
| Final R indices                     | 2968 data; I>2 $\sigma$ (I) R1 = 0.0818, wR2 = 0.1788<br>all data R1 = 0.1647, wR2 = 0.2228 |
| Weighting scheme                    | $w=1/[\sigma^2(F_o^2)+(0.1117P)^2+0.2711P]$<br>where $P=(F_o^2+2F_c^2)/3$                   |
| Largest diff. peak and hole         | 0.426 and -0.551 eÅ <sup>-3</sup>                                                           |
| R.M.S. deviation from mean          | 0.179 eÅ <sup>-3</sup>                                                                      |

## References

1. T. Toma, J. Shimokawa and T. Fukuyama, *Org. Lett.* 2007, **9**, 3195-3197.
2. L. H. Yeh, H. K. Wang, Y. L. Ciou and J. C. Hsieh, *Org. Lett.* 2019, **21**, 6, 1730-1734.
3. M. Tobisu, H. Fujihara, K. Koh and N. Chatani, *J. Org. Chem.* 2010, **75**, 4841-4847.
4. O. Yabe, H. Mizufune and T. Ikemoto, *Synlett.* 2009, **8**, 1291-1294.
5. . Marco Buccini, S. Y. Jeow, L. Byrne, Brian W. Skelton, T. M. Nguyen, Christina L. L. Chai and Matthew J. Piggott, *Eur. J. Org. Chem.* 2013, **2013**, 3232-3240.

## 7. NMR Spectra

$^1\text{H}$  NMR and  $^{13}\text{C}$  NMR spectra of compound **1a**

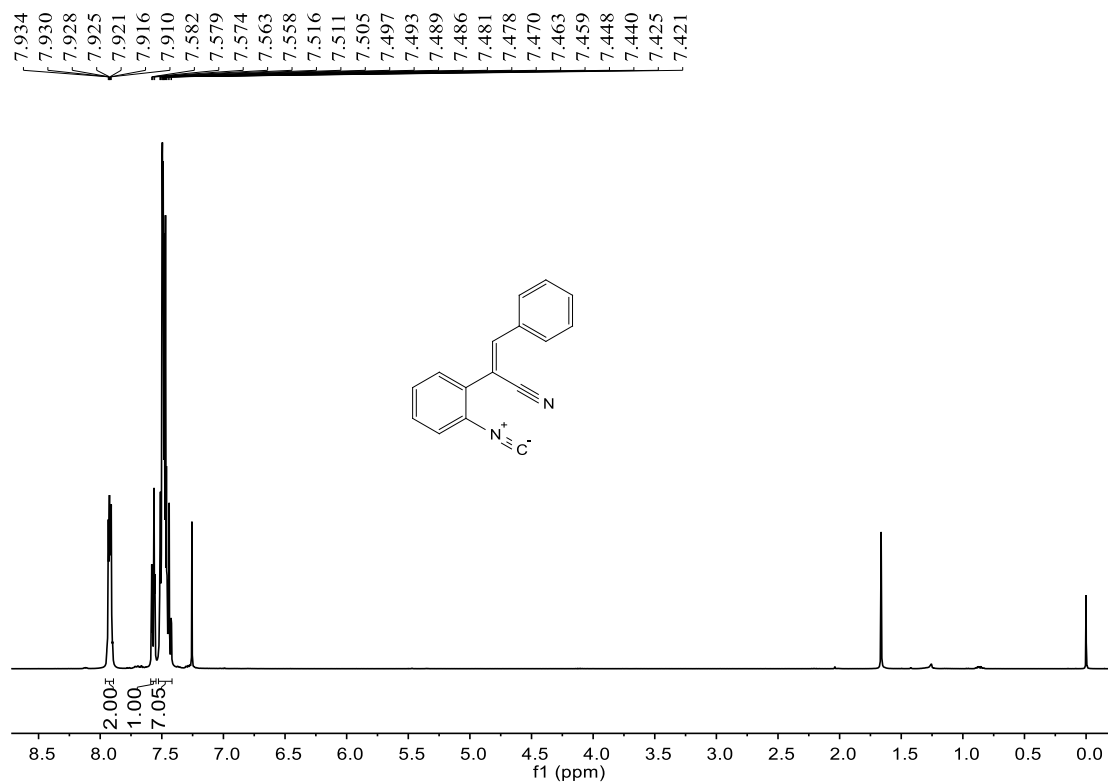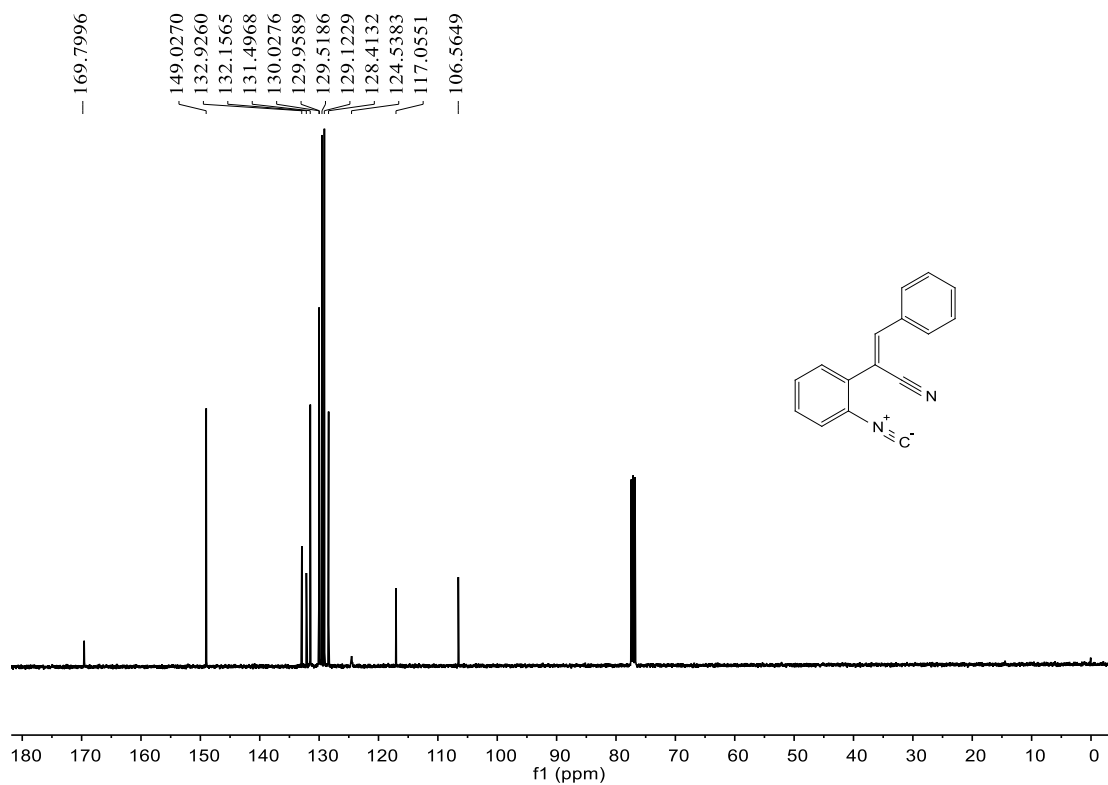

# <sup>1</sup>H NMR and <sup>13</sup>C NMR spectra of compound **1b**

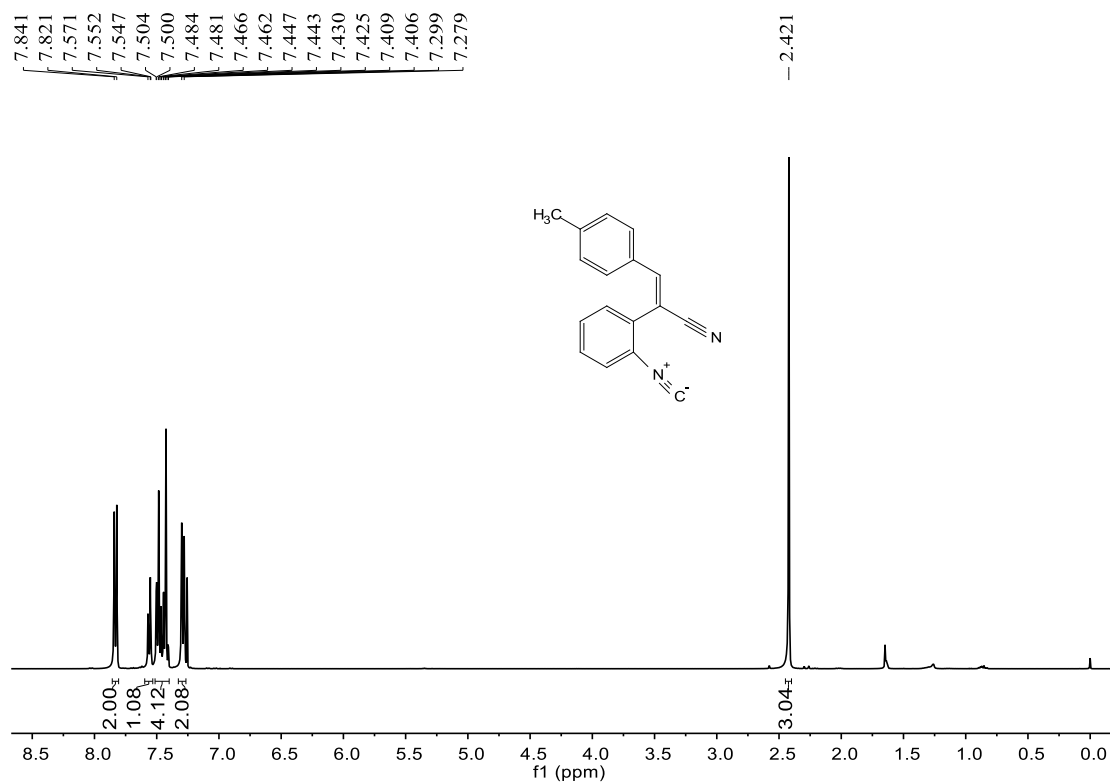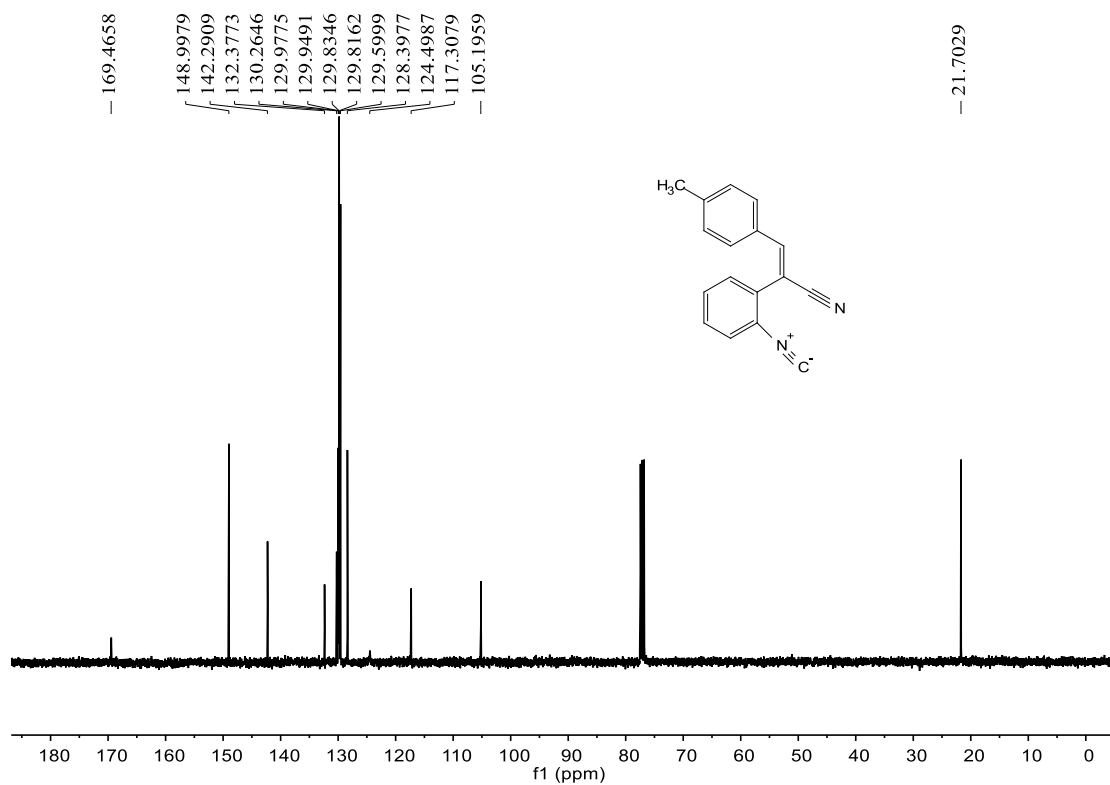

<sup>1</sup>H NMR and <sup>13</sup>C NMR spectra of compound **1c**

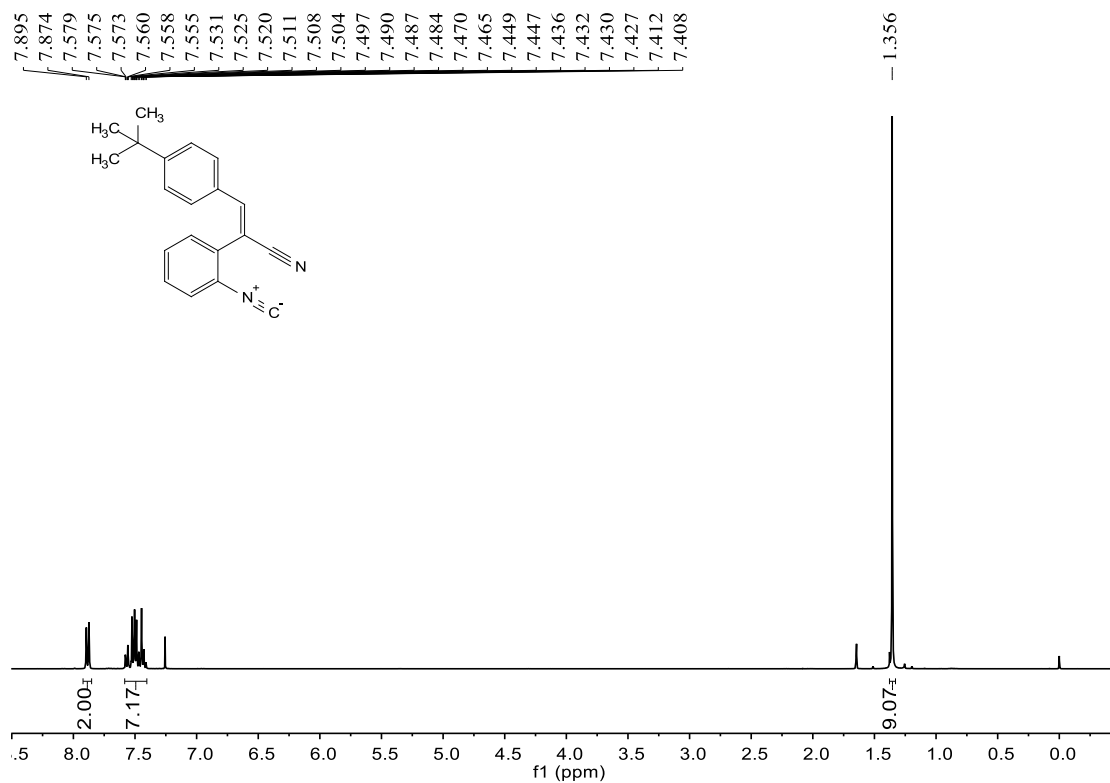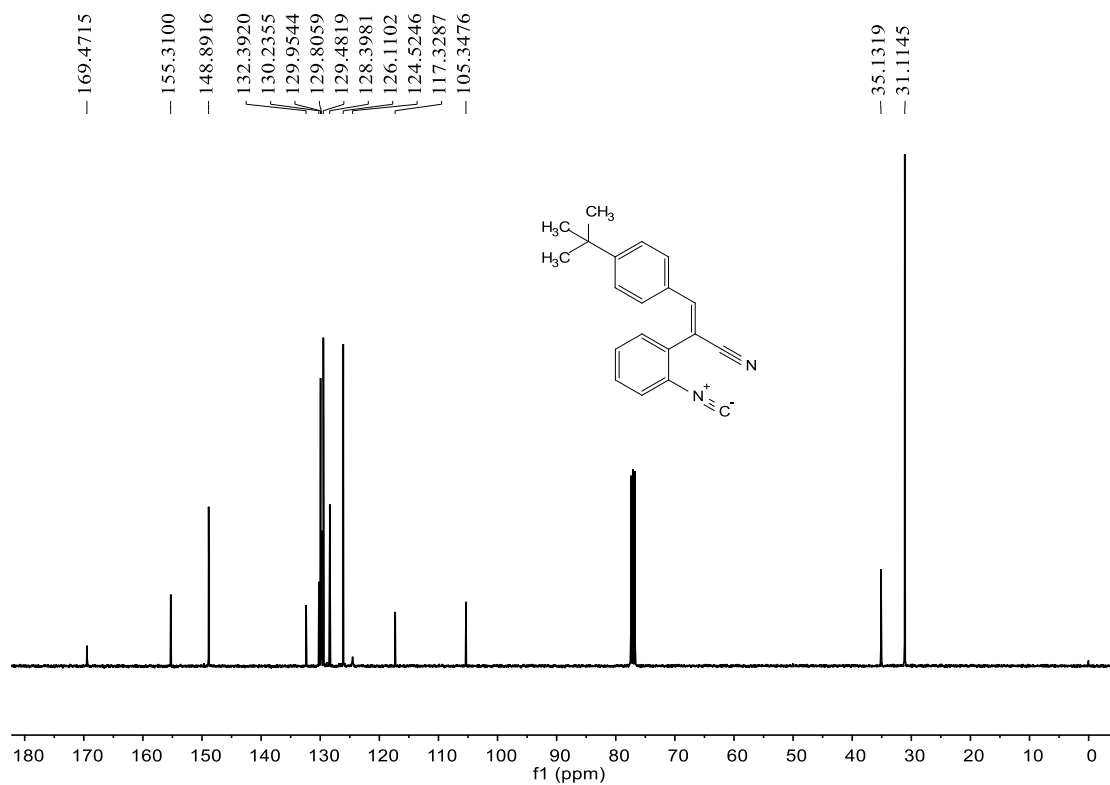

# <sup>1</sup>H NMR and <sup>13</sup>C NMR spectra of compound **1d**

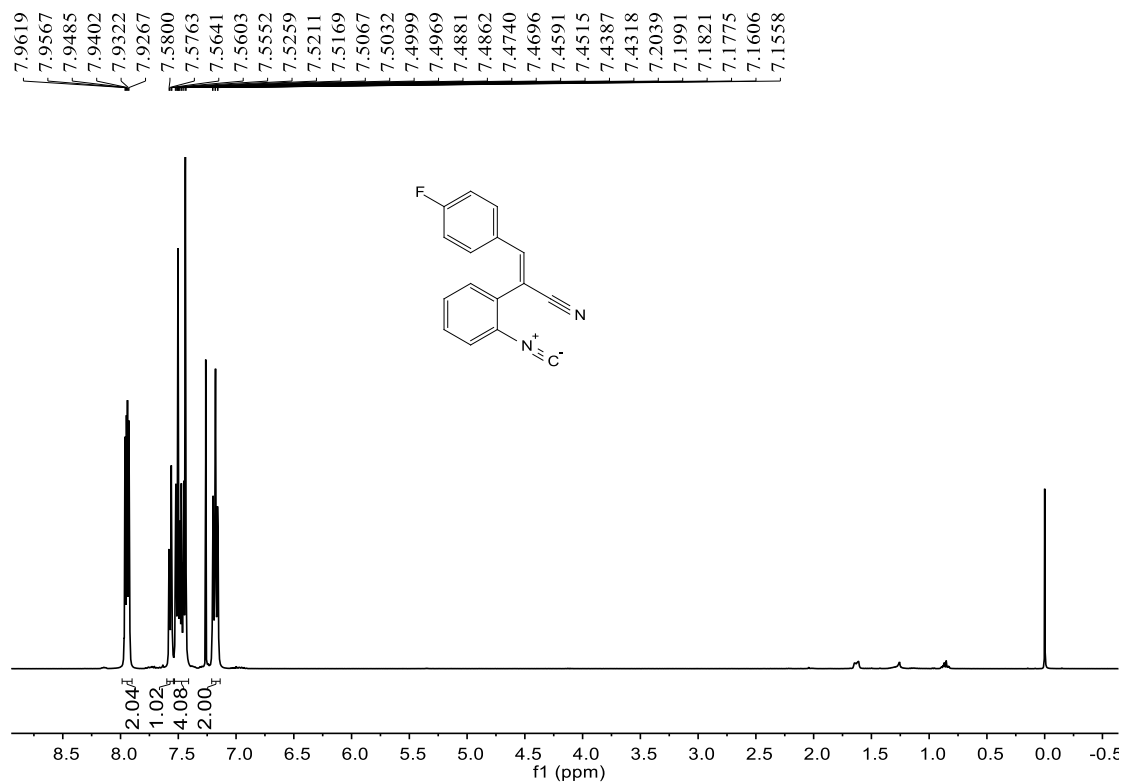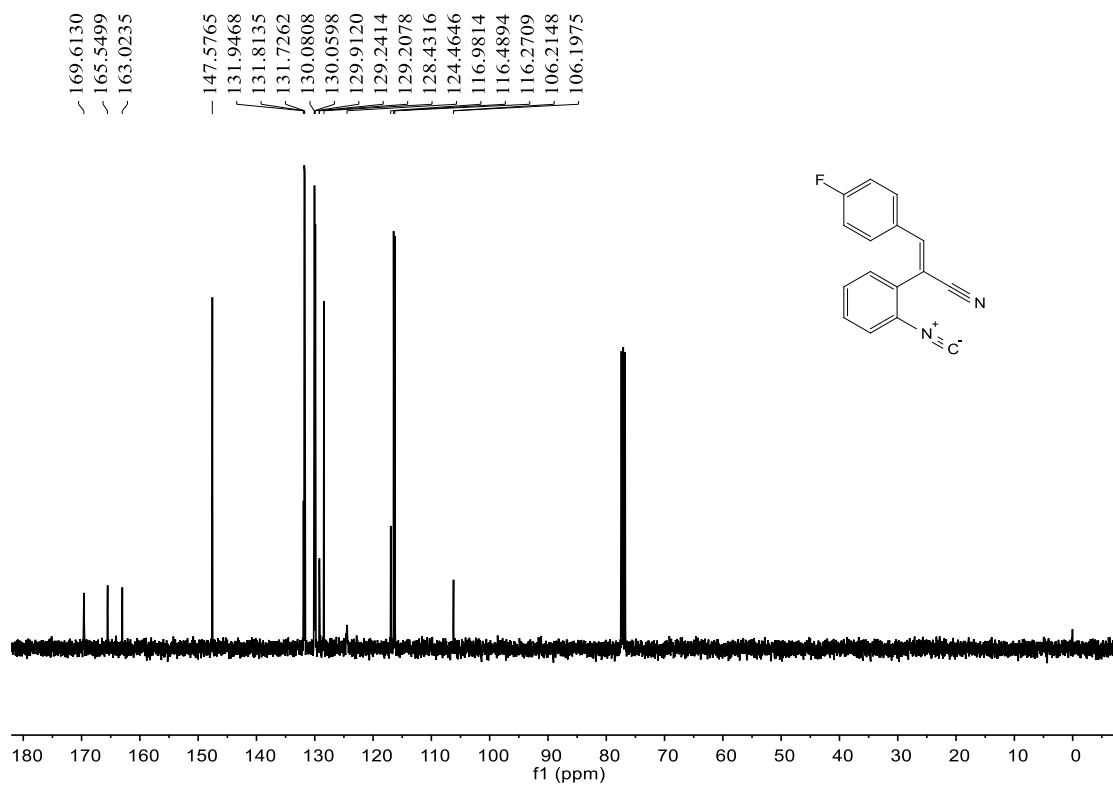

# <sup>1</sup>H NMR and <sup>13</sup>C NMR spectra of compound 1e

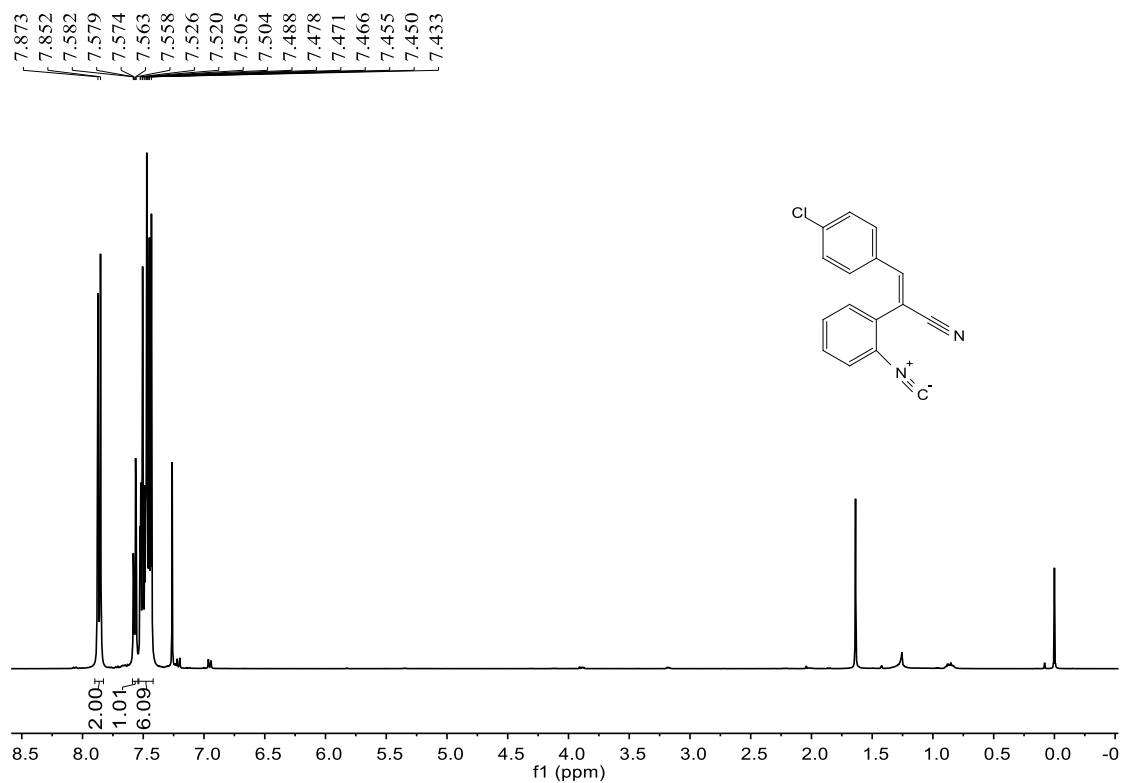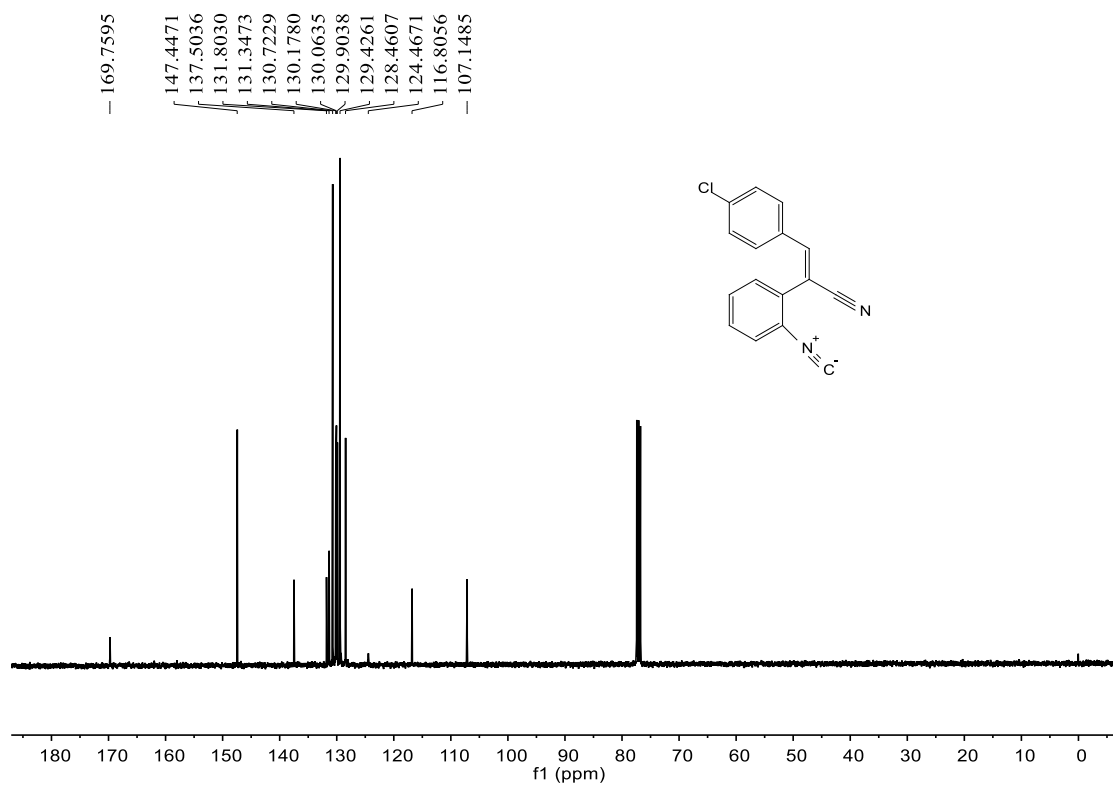

# <sup>1</sup>H NMR and <sup>13</sup>C NMR spectra of compound 1f

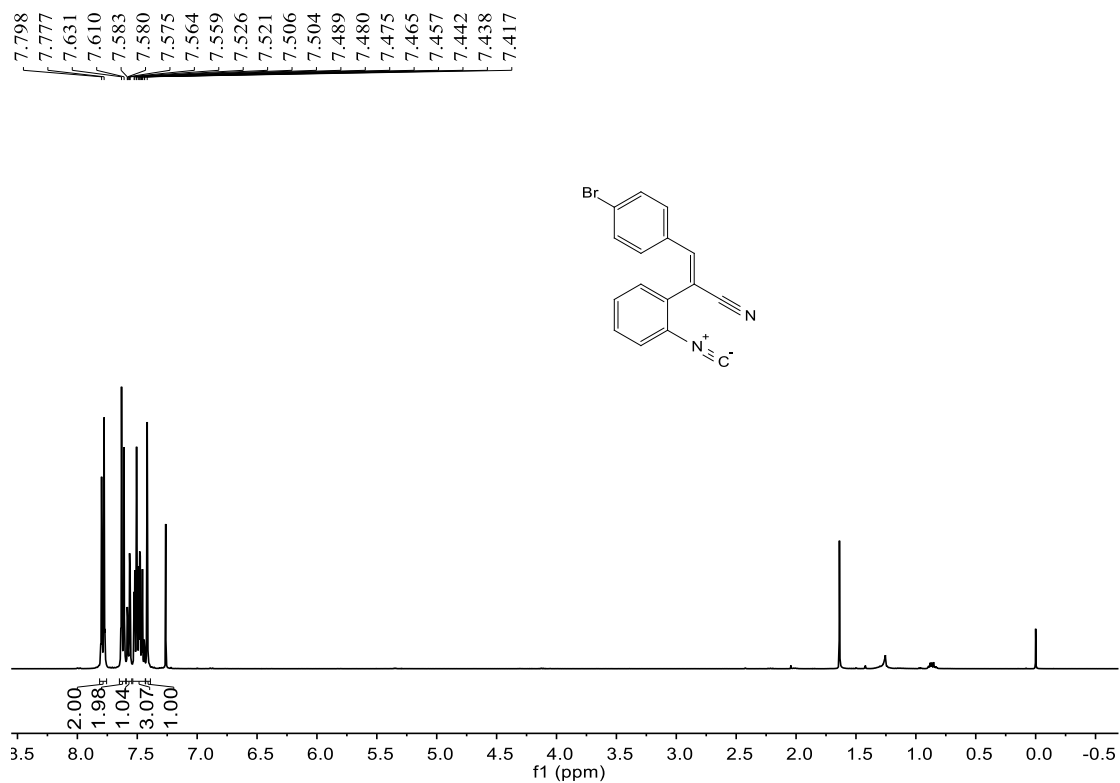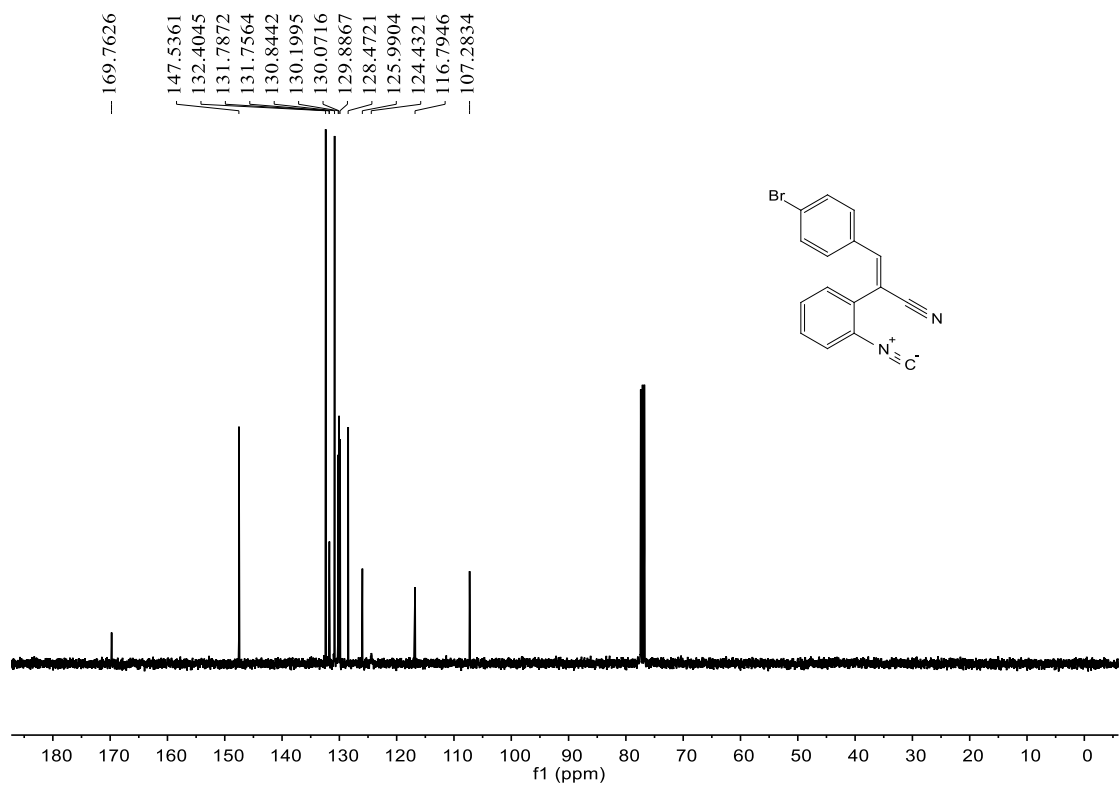



# <sup>1</sup>H NMR and <sup>13</sup>C NMR spectra of compound **1g**

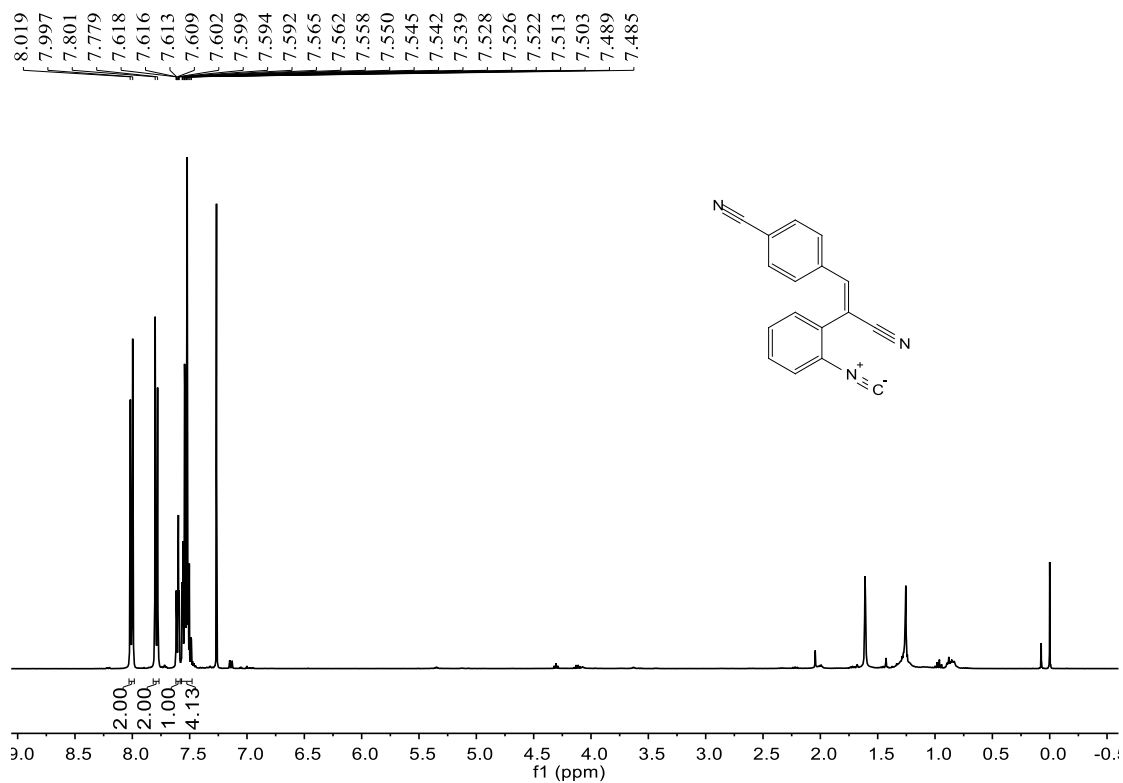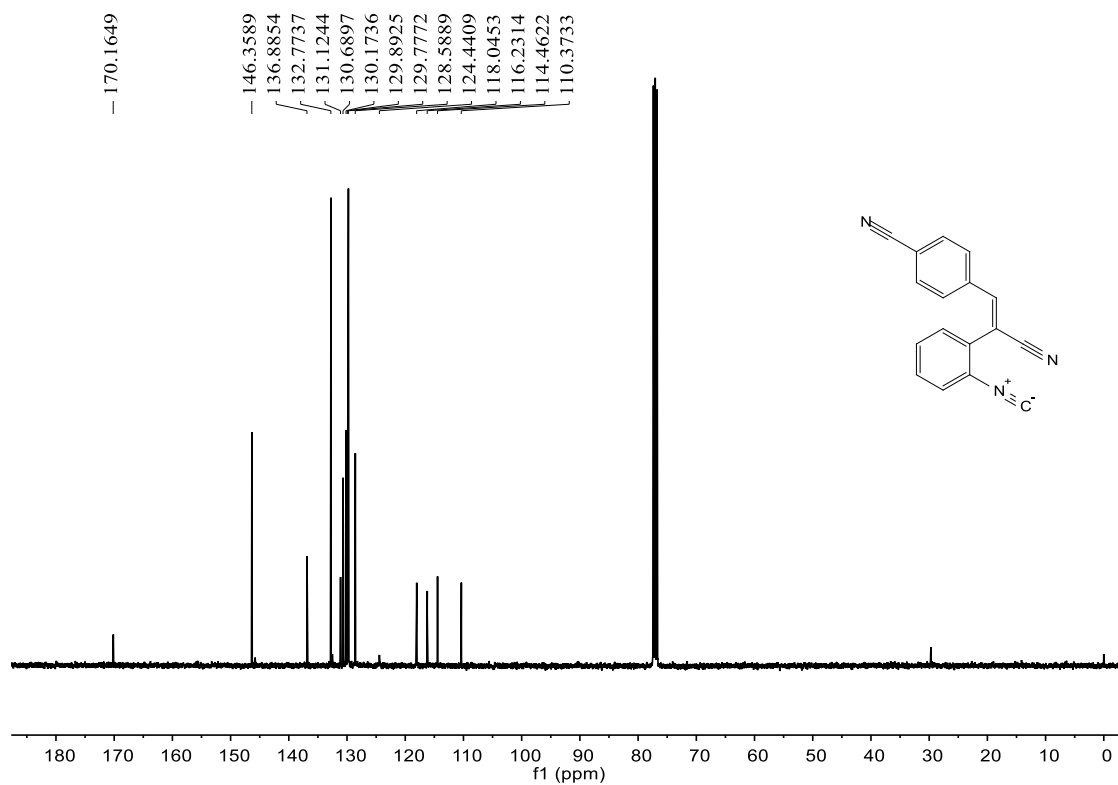

# <sup>1</sup>H NMR and <sup>13</sup>C NMR spectra of compound **1h**

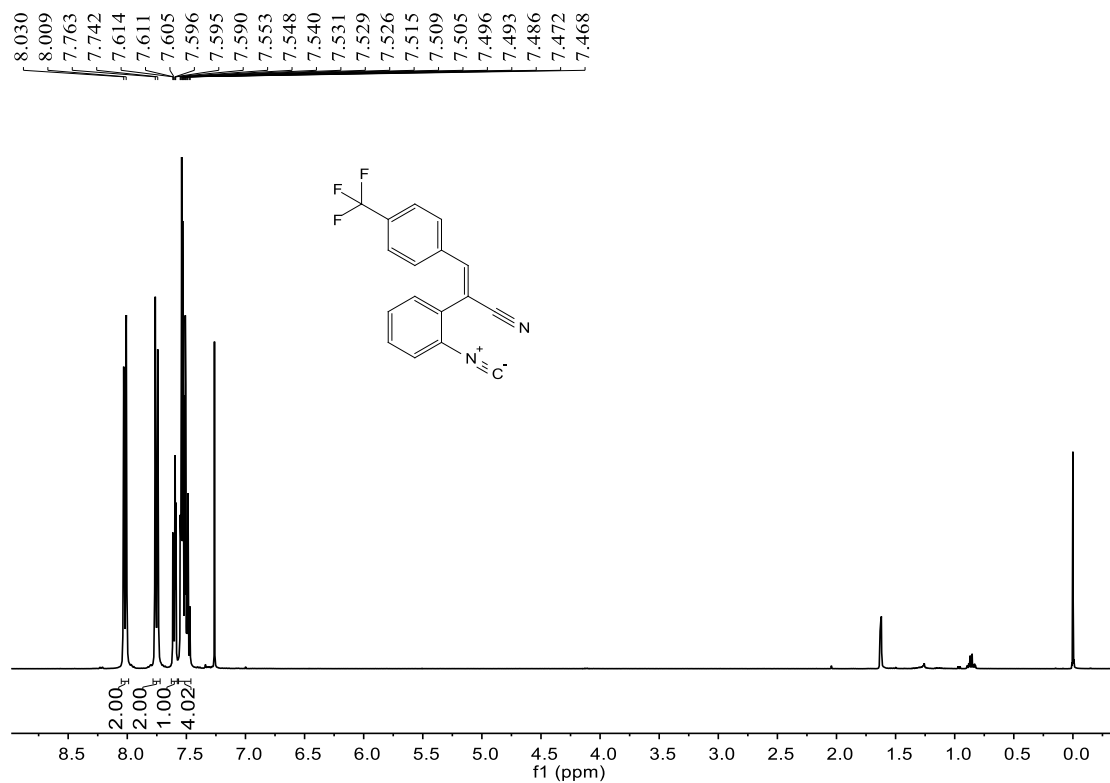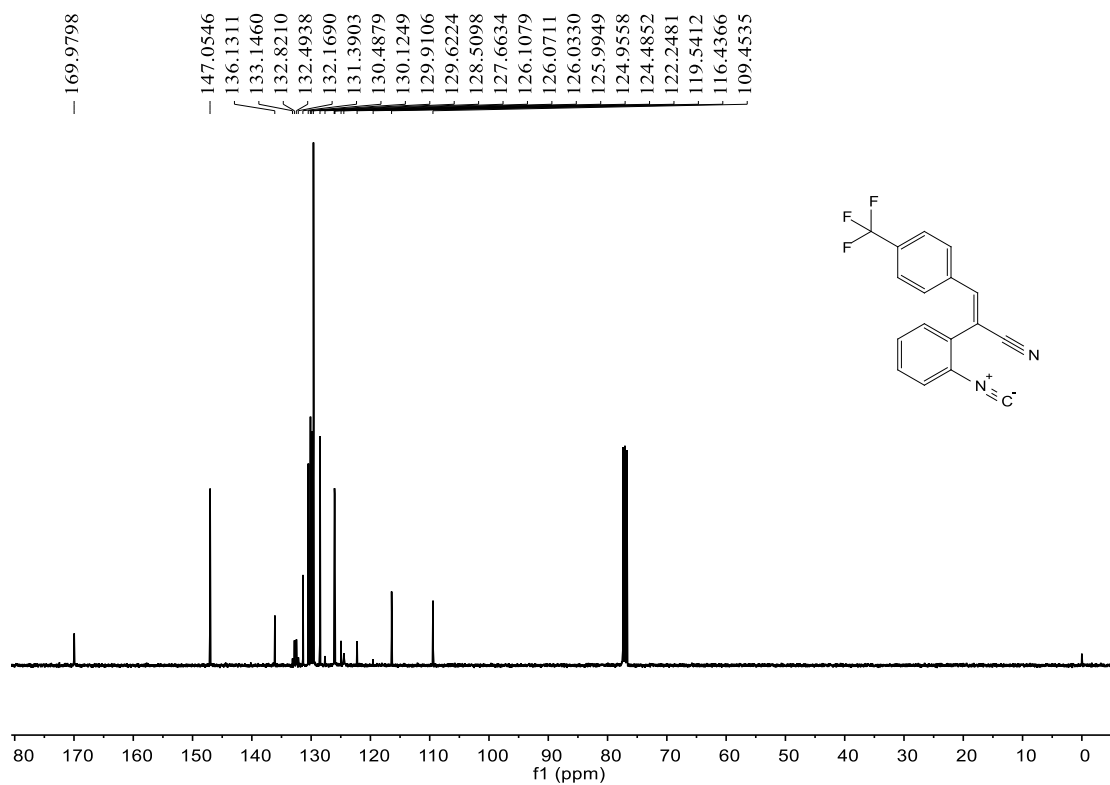

<sup>1</sup>H NMR and <sup>13</sup>C NMR spectra of compound **1i**

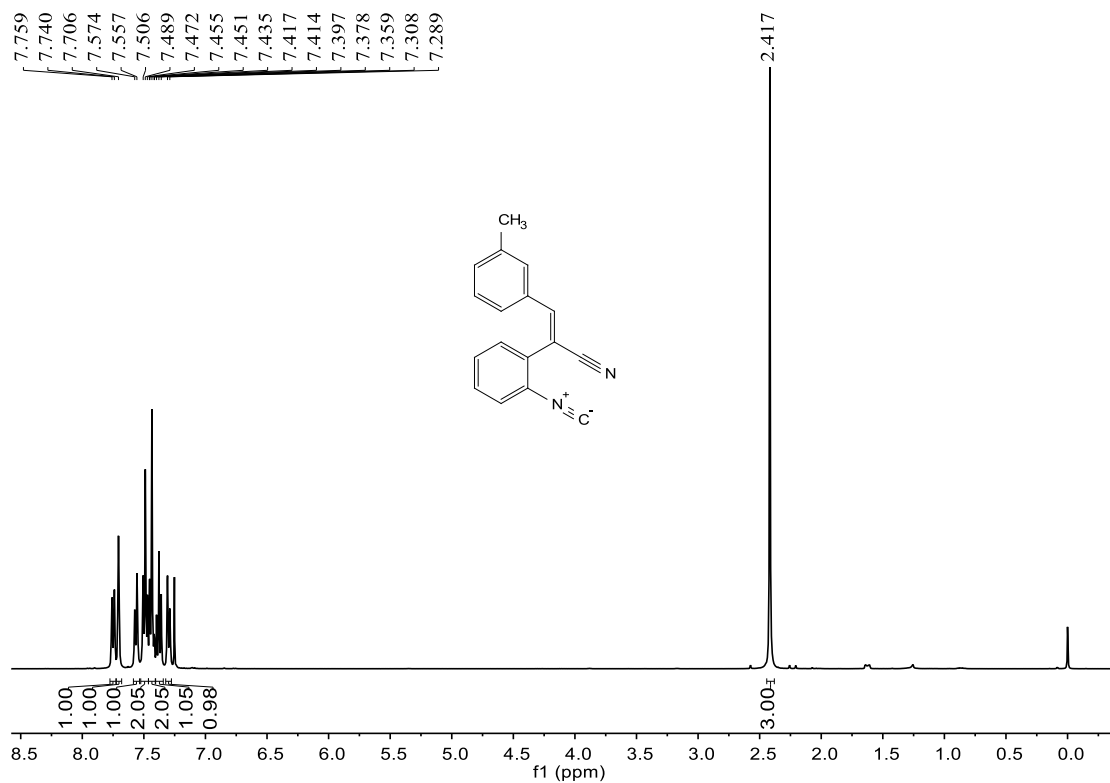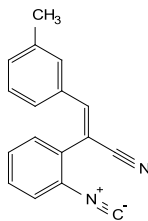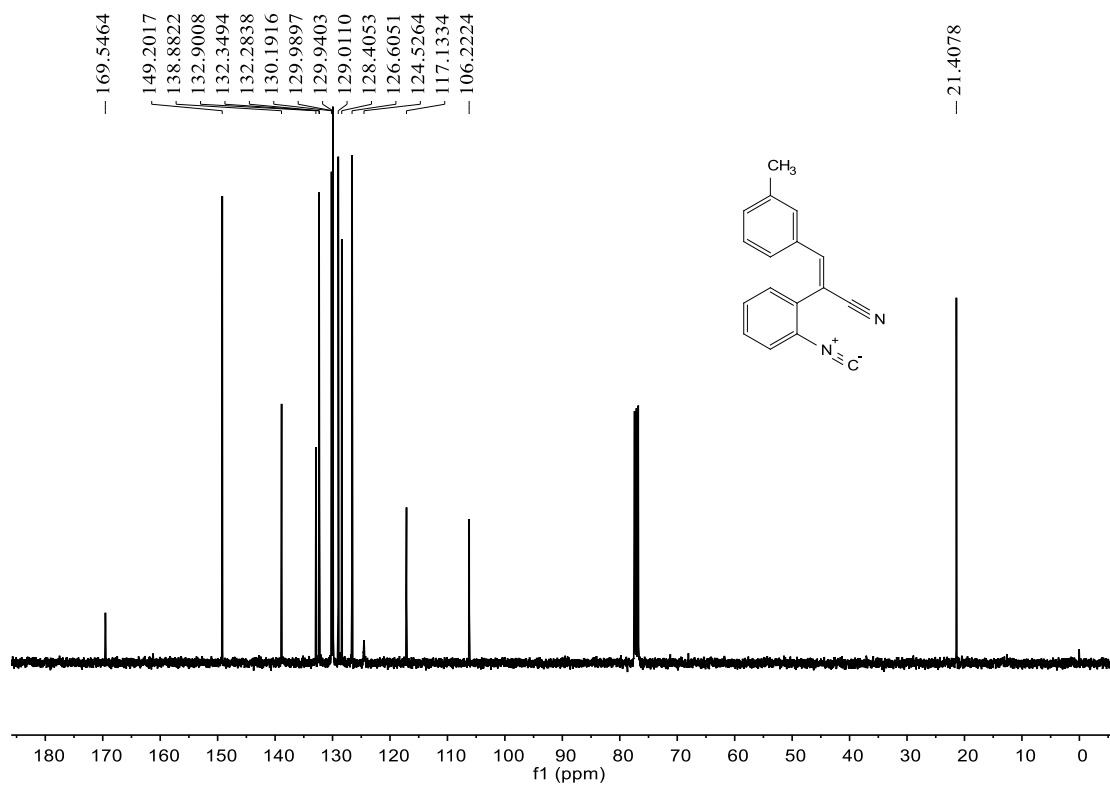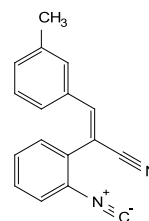

# <sup>1</sup>H NMR and <sup>13</sup>C NMR spectra of compound 1j

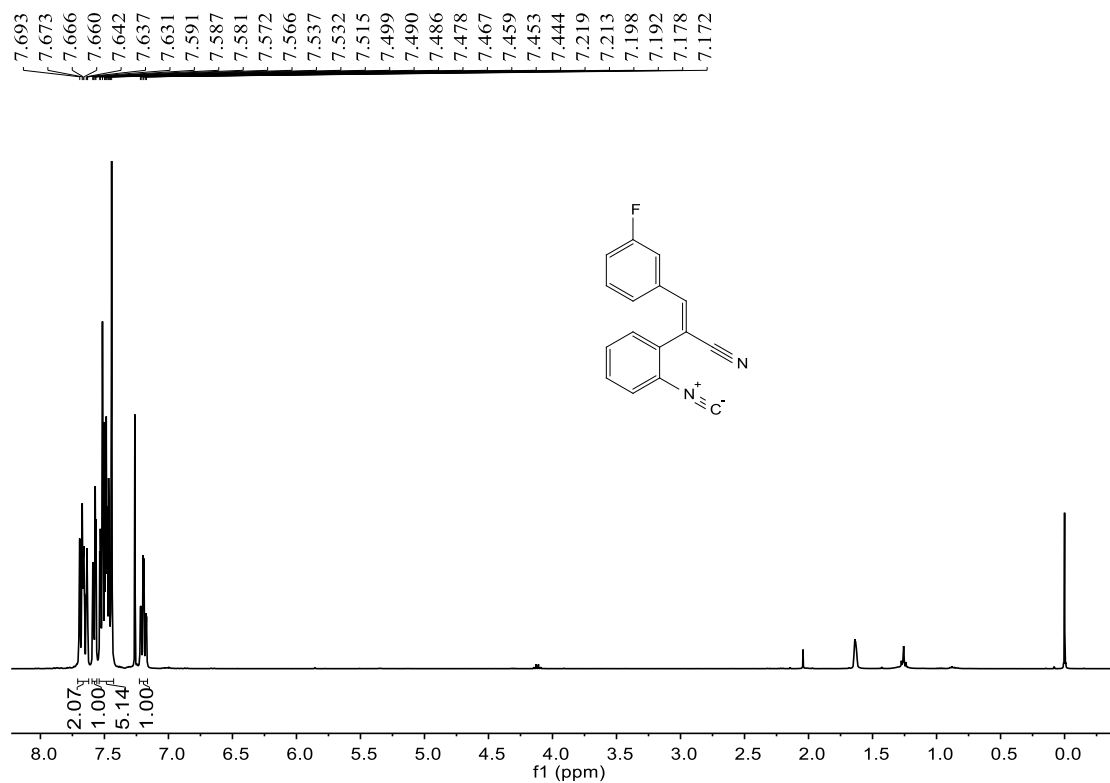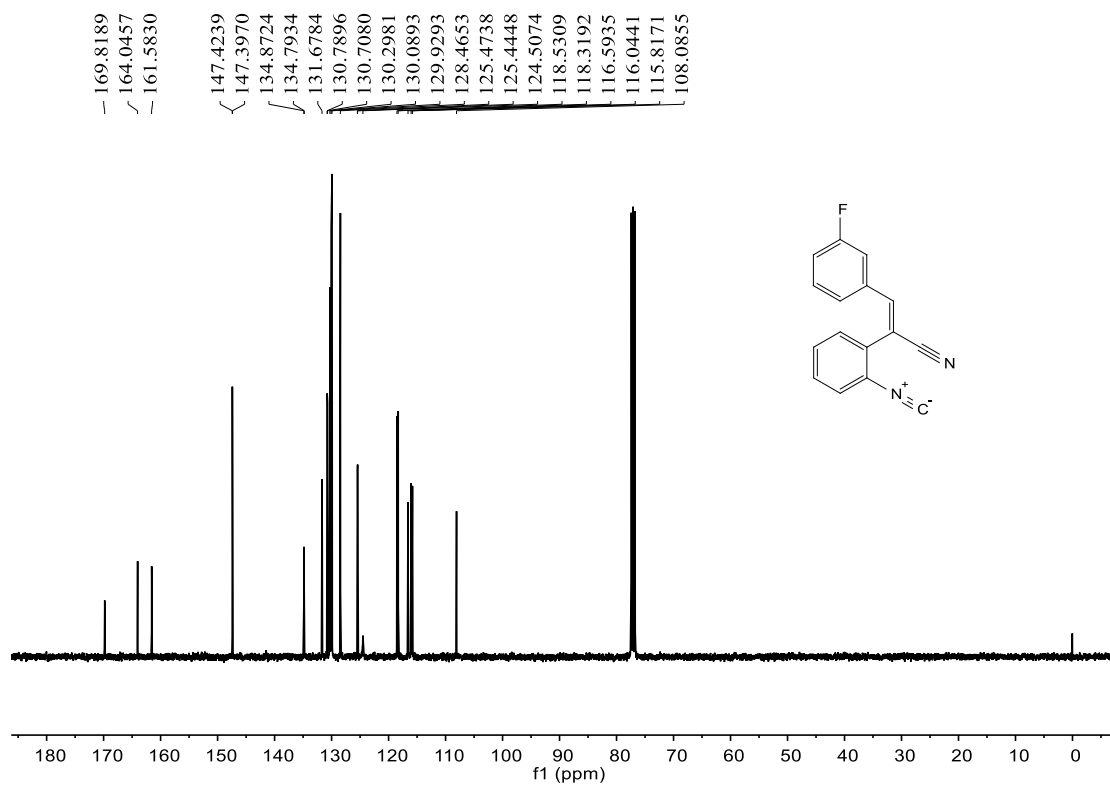

<sup>1</sup>H NMR and <sup>13</sup>C NMR spectra of compound **1k**

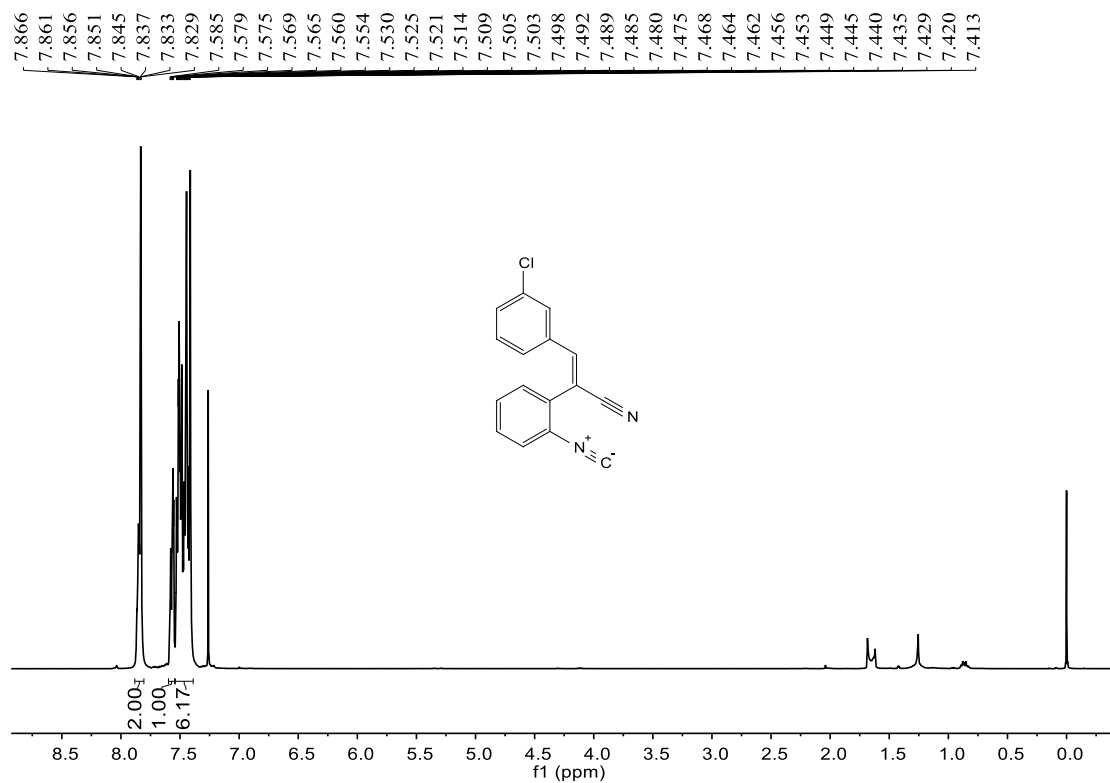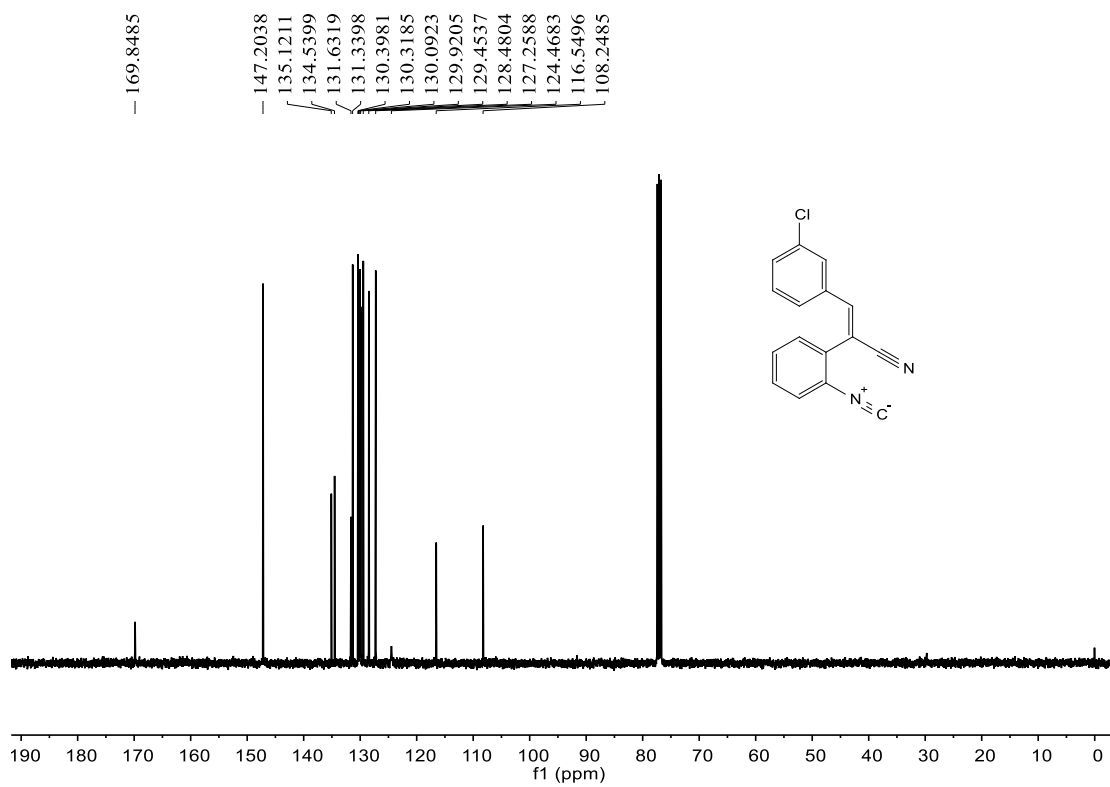

# $^1\text{H}$ NMR and $^{13}\text{C}$ NMR spectra of compound 11

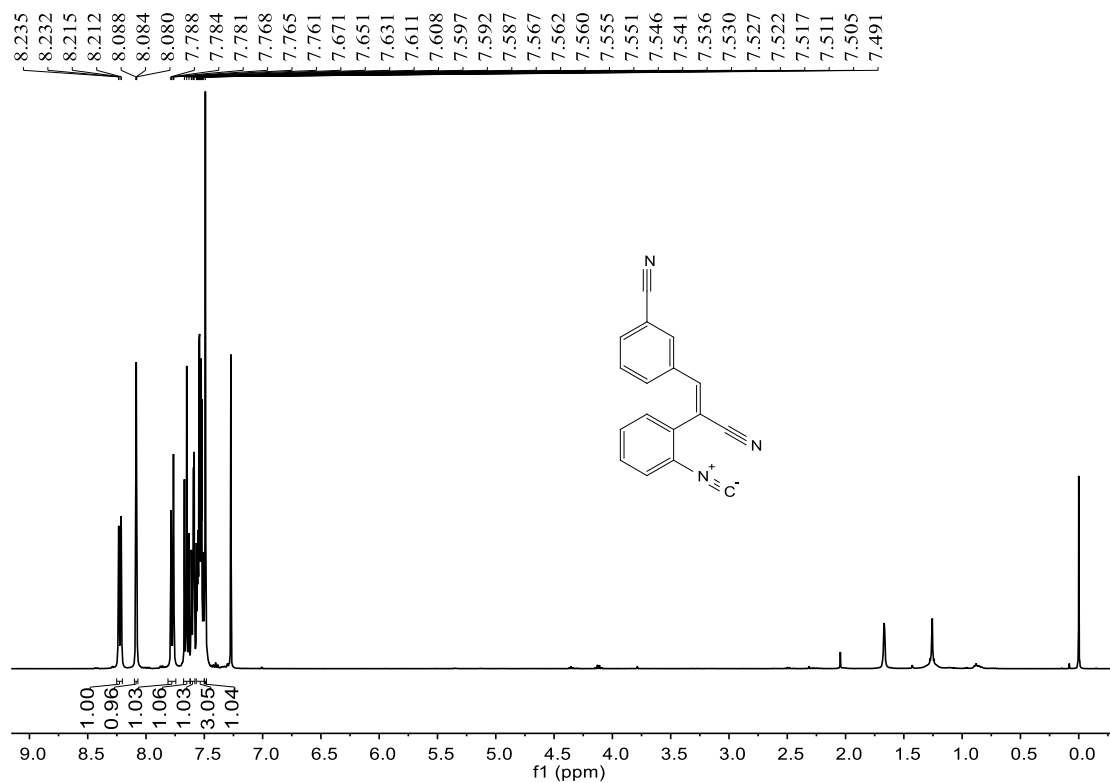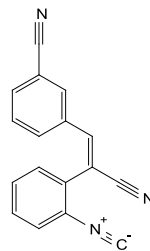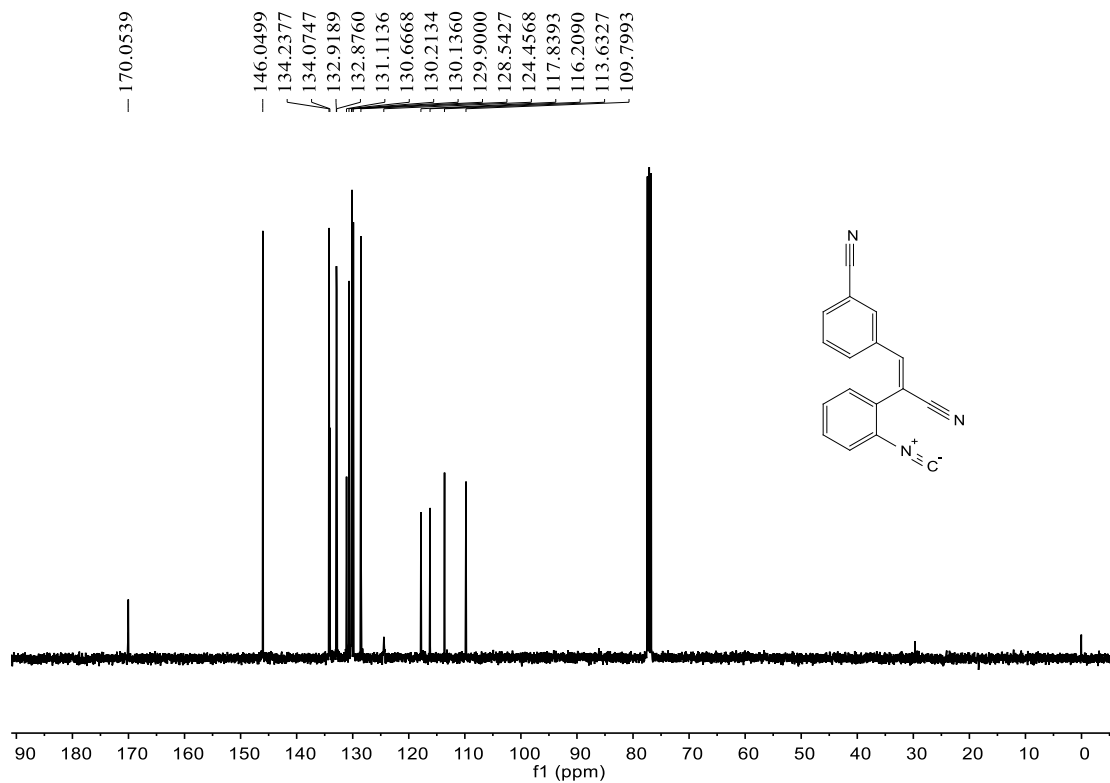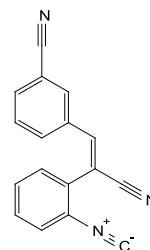

<sup>1</sup>H NMR and <sup>13</sup>C NMR spectra of compound **1m**

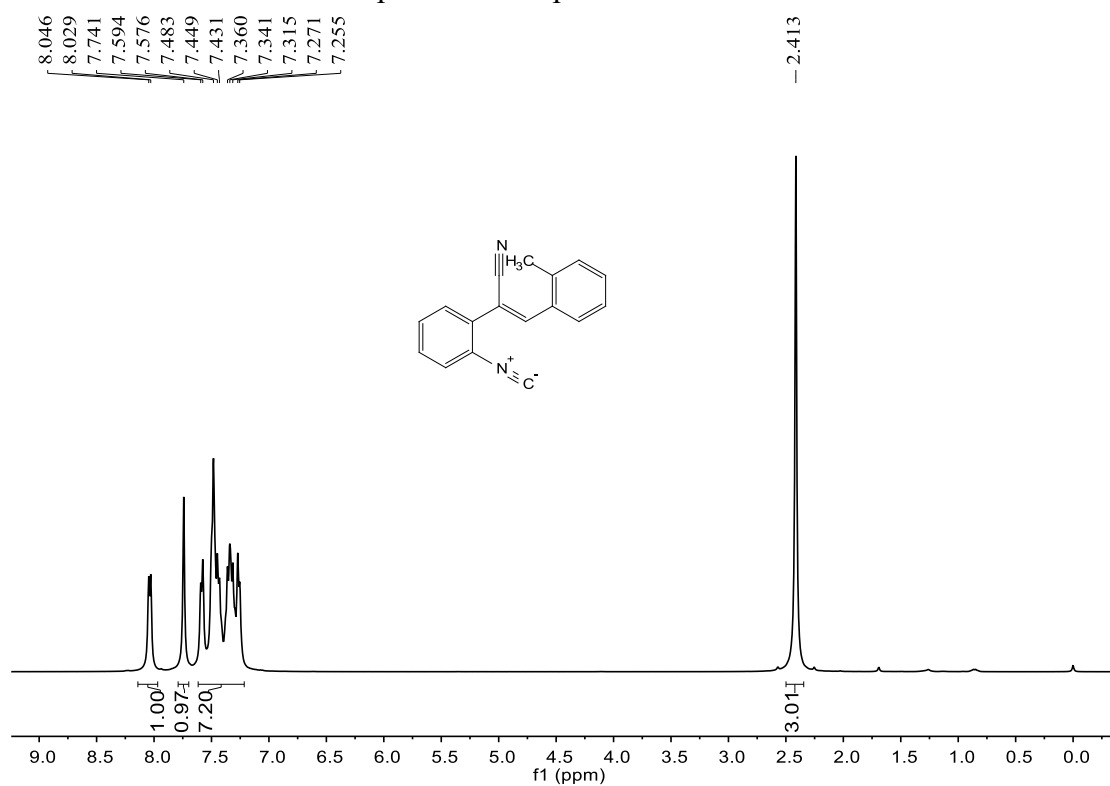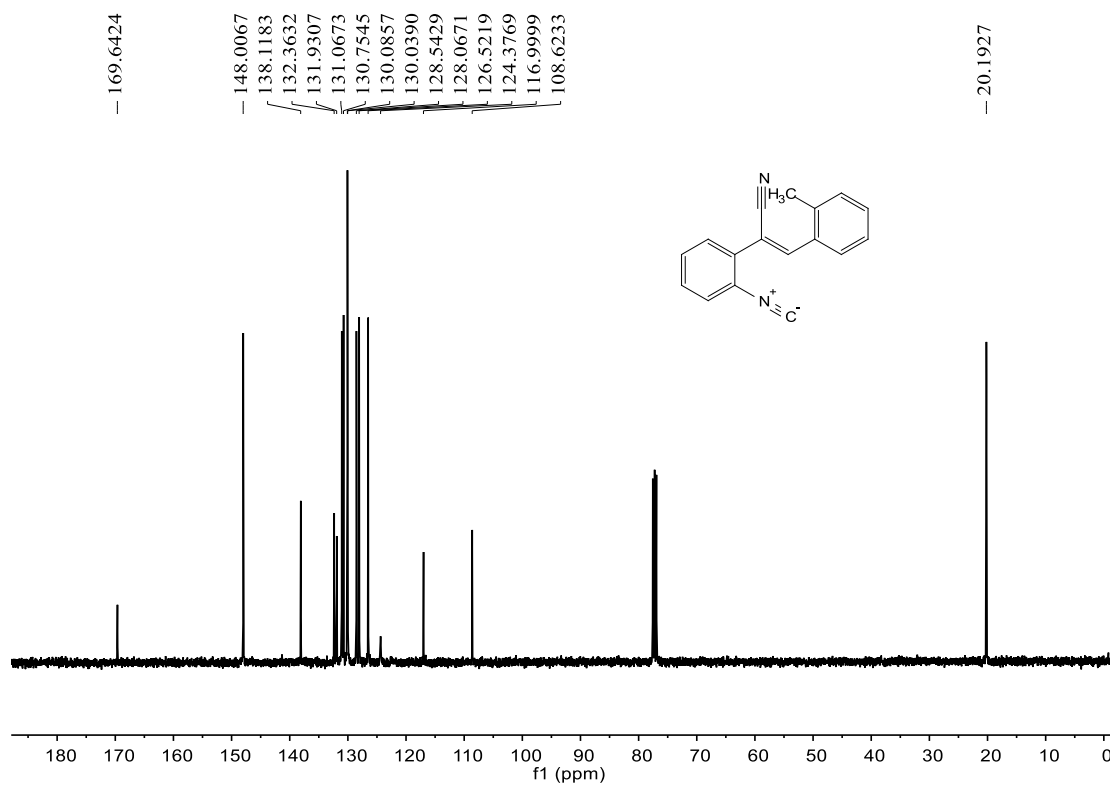

<sup>1</sup>H NMR and <sup>13</sup>C NMR spectra of compound **1n**

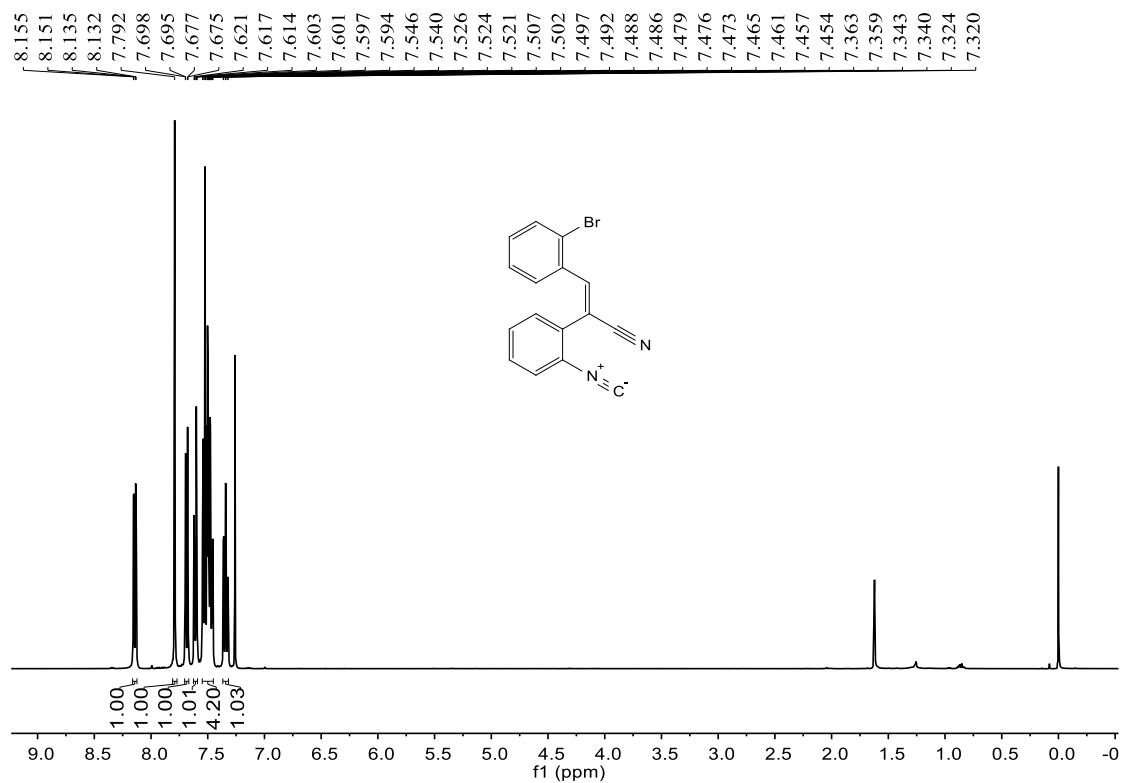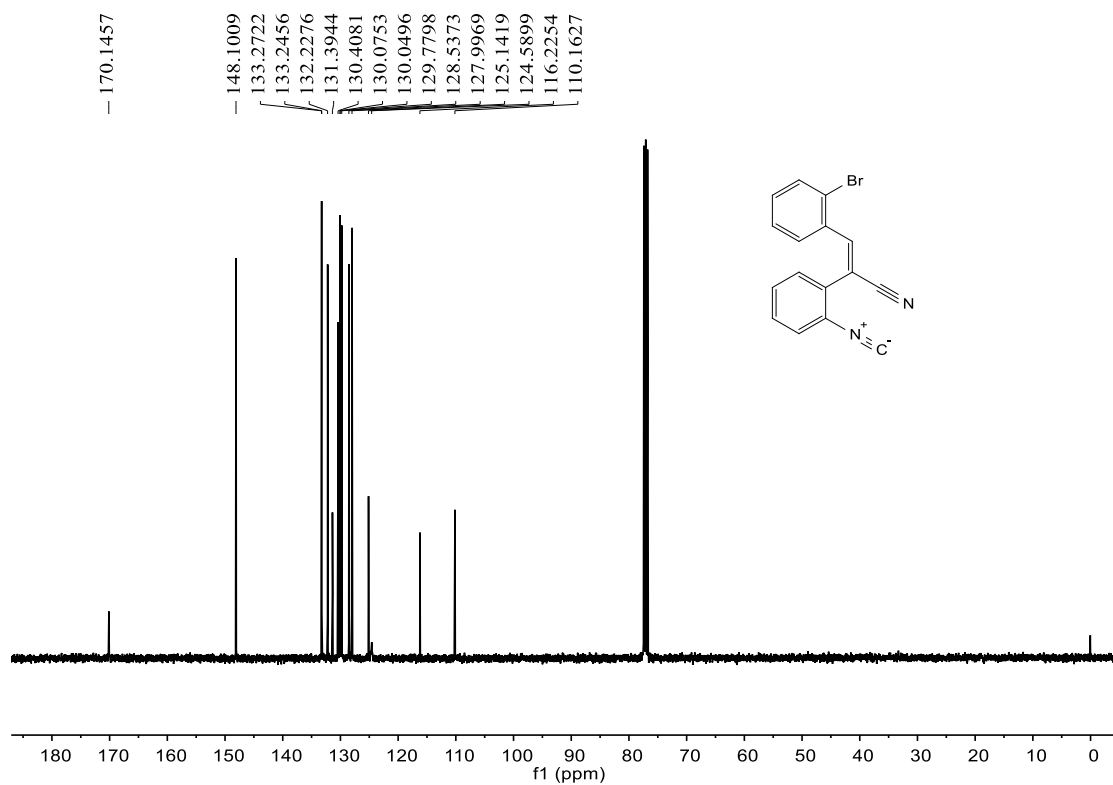



<sup>1</sup>H NMR and <sup>13</sup>C NMR spectra of compound **1o**

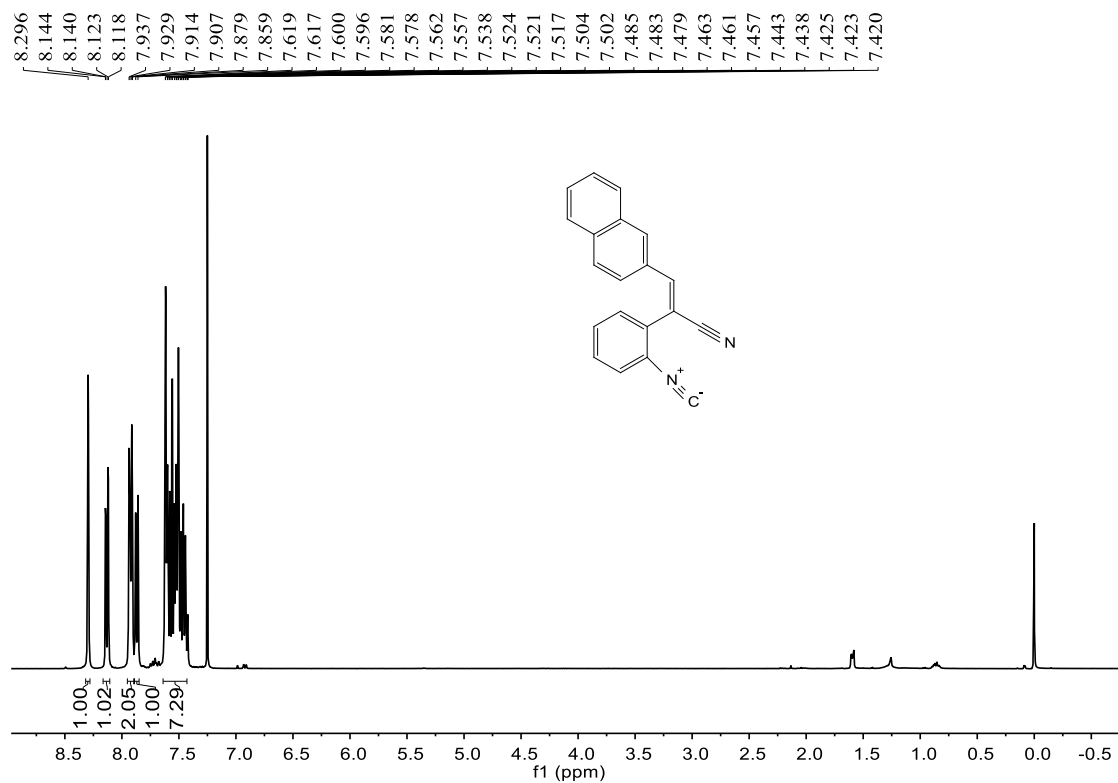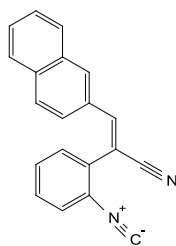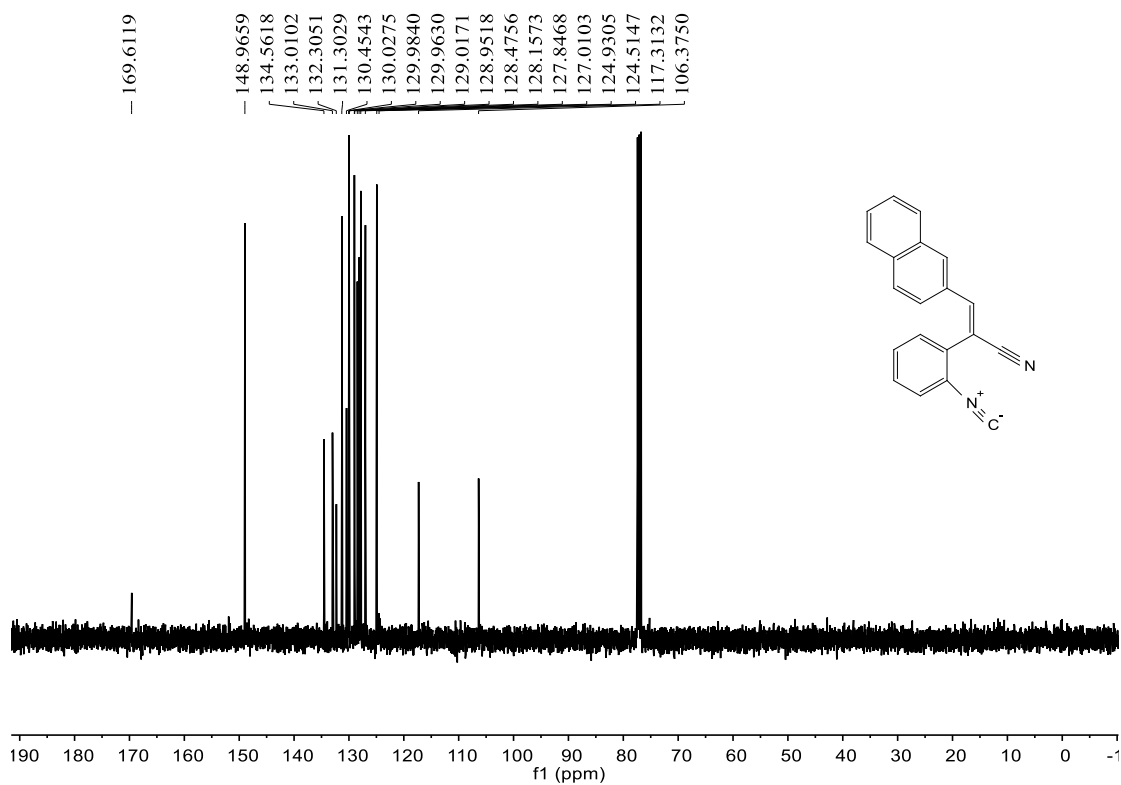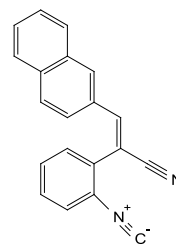

# <sup>1</sup>H NMR and <sup>13</sup>C NMR spectra of compound 1p

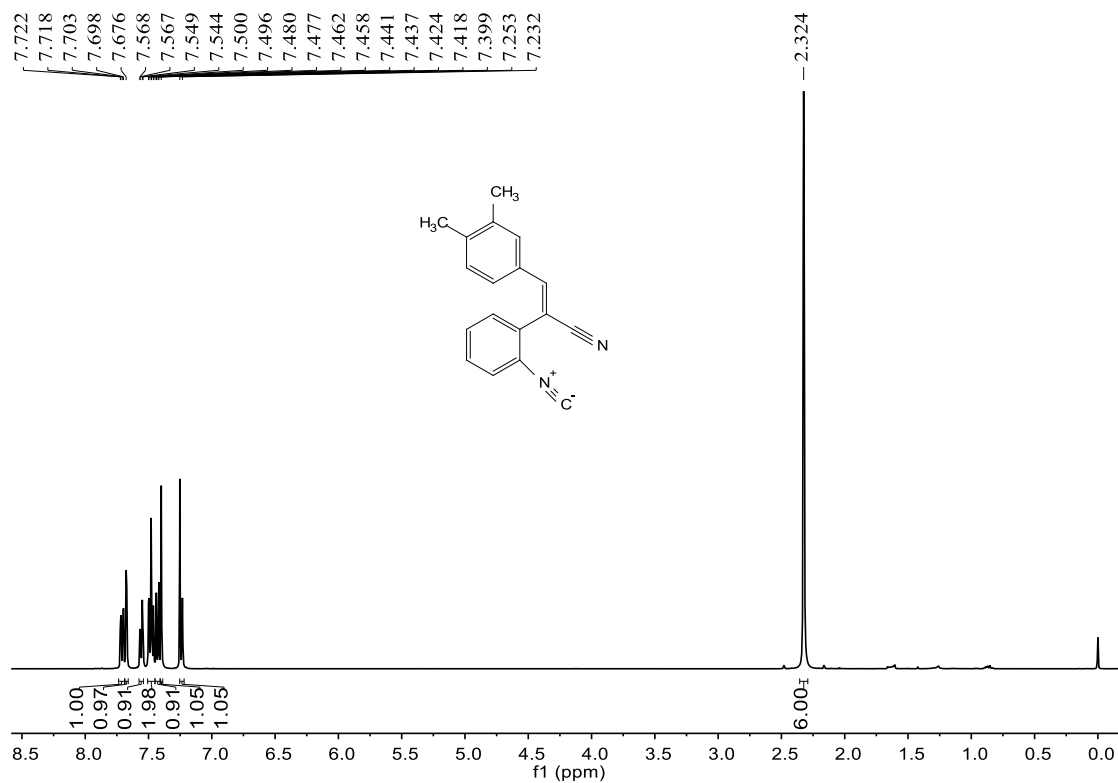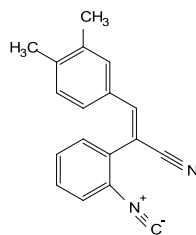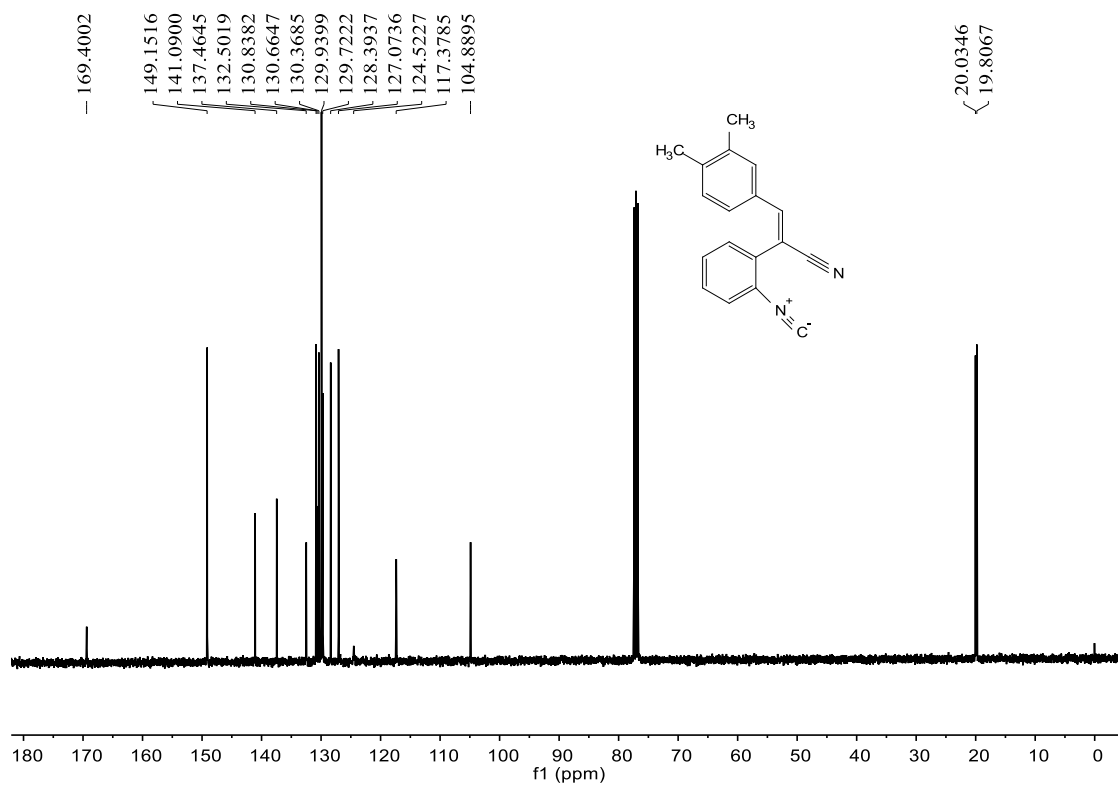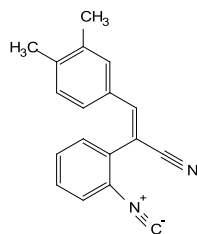

# <sup>1</sup>H NMR and <sup>13</sup>C NMR spectra of compound **1q**

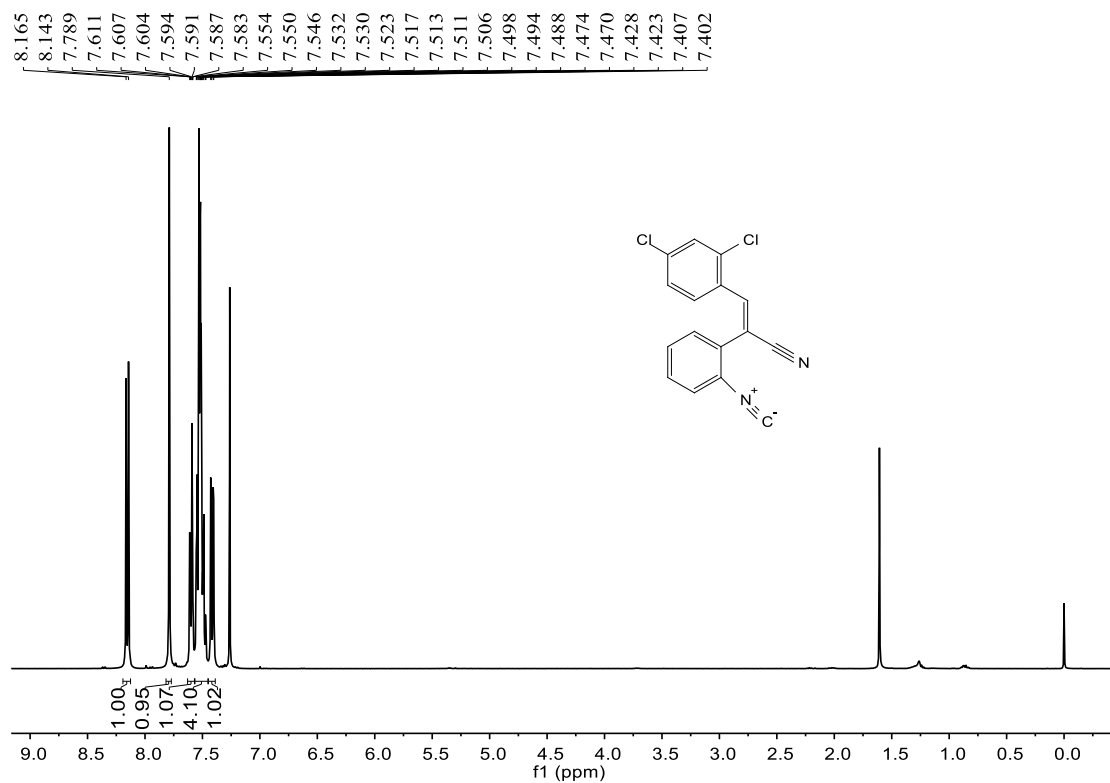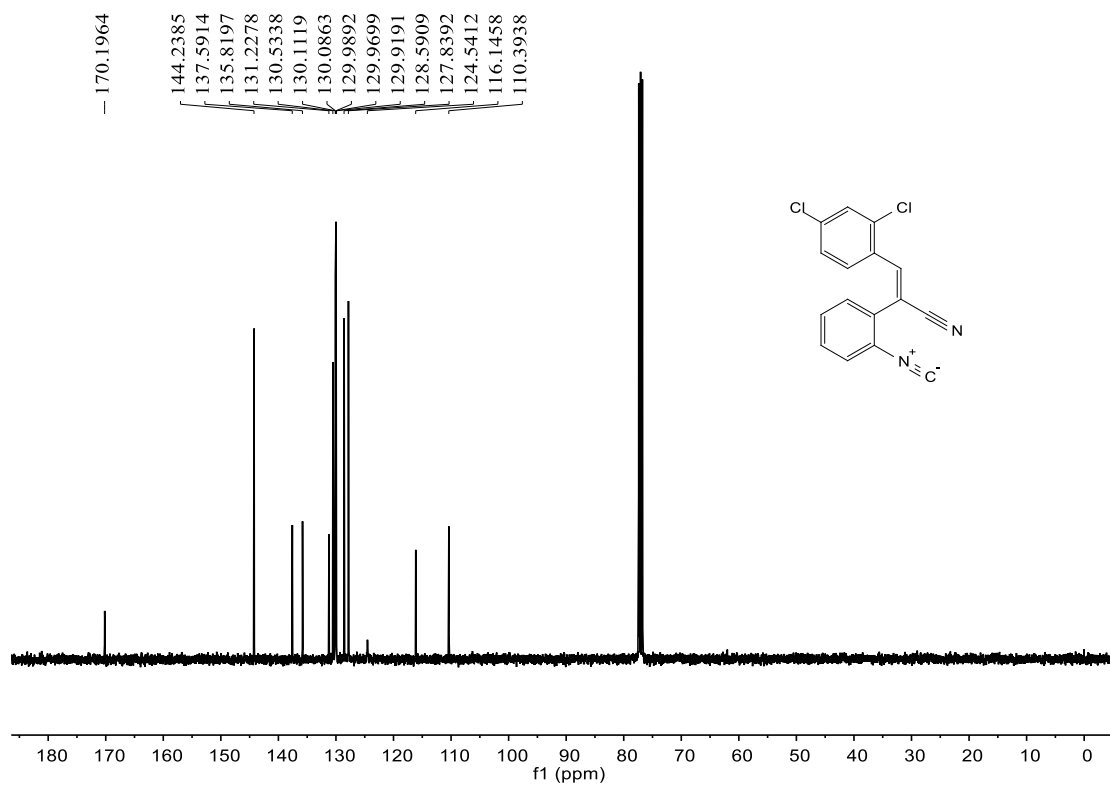

<sup>1</sup>H NMR and <sup>13</sup>C NMR spectra of compound **1r**

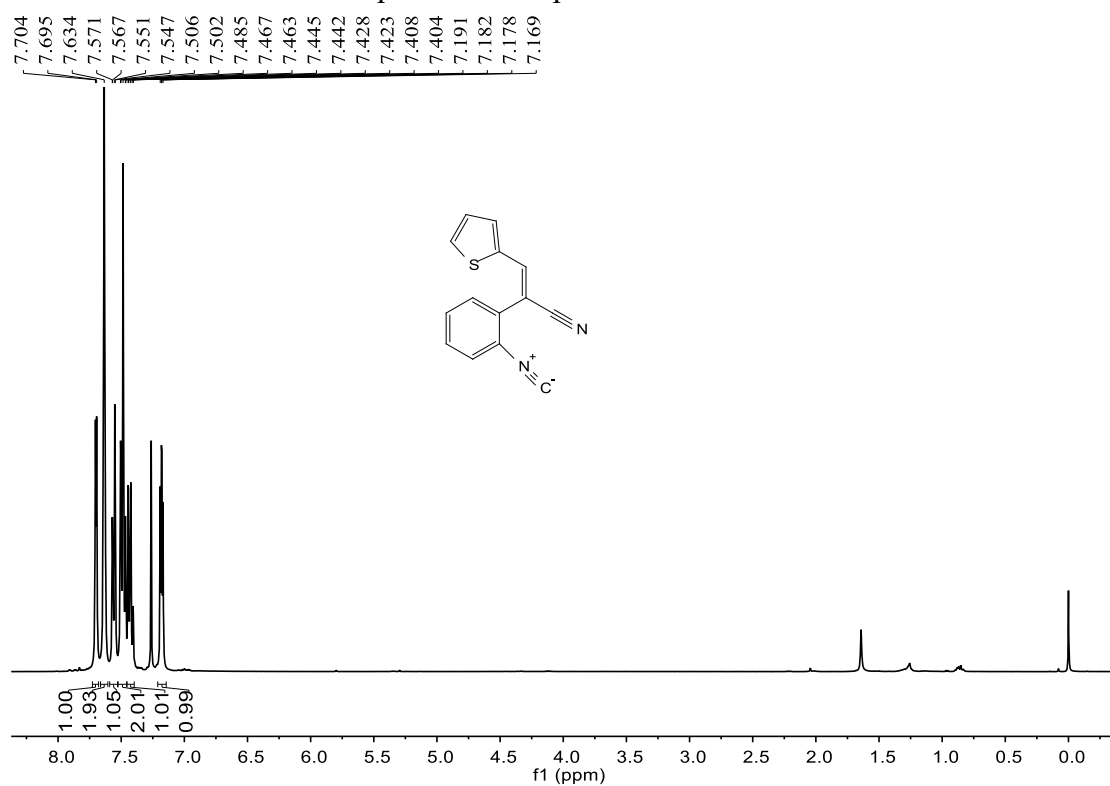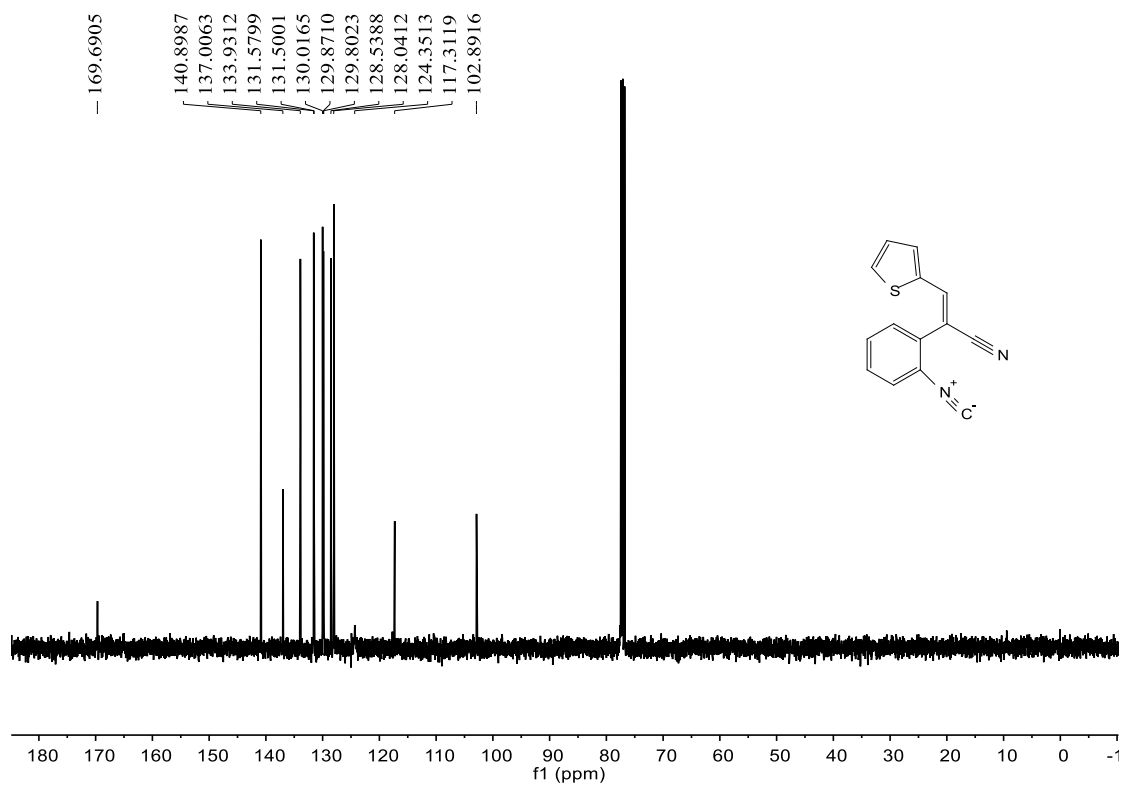

<sup>1</sup>H NMR and <sup>13</sup>C NMR spectra of compound **1s**

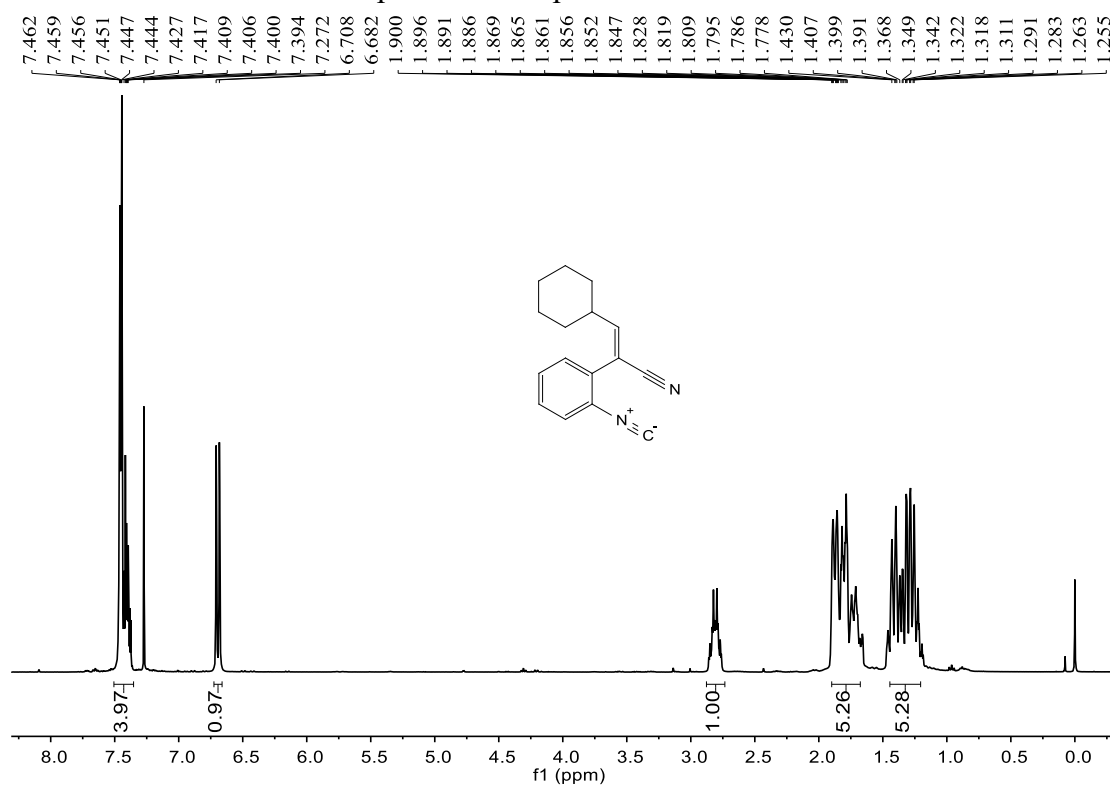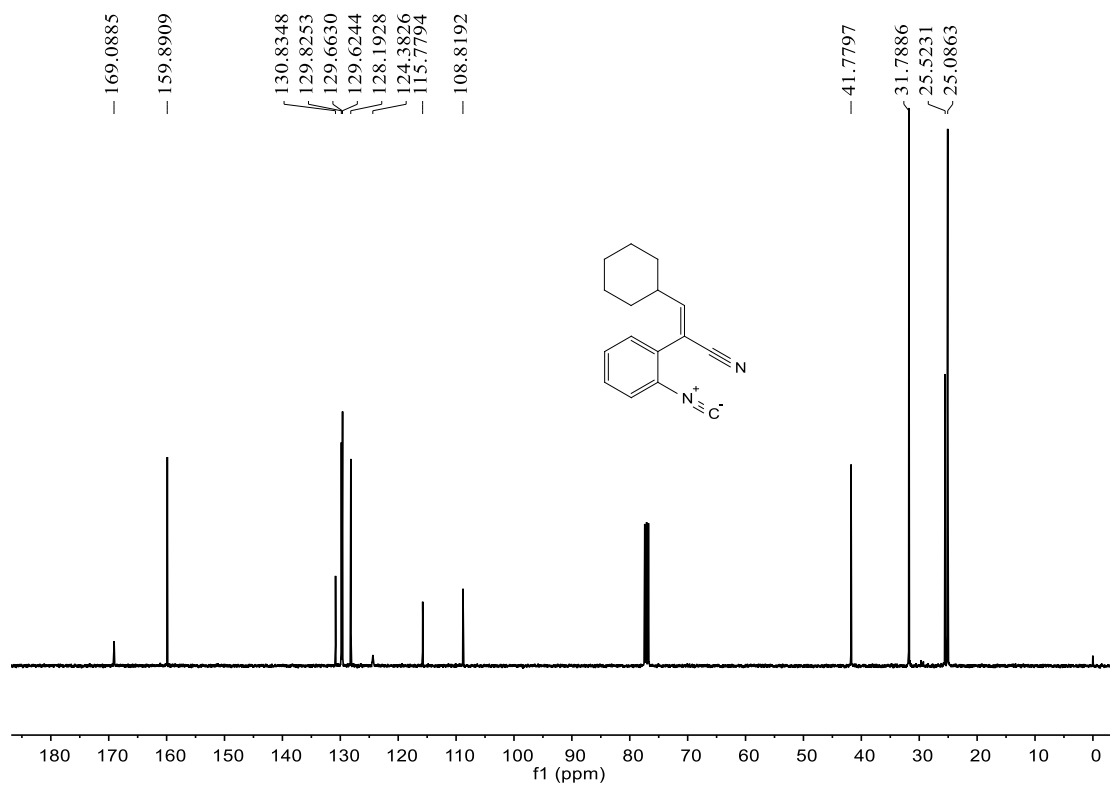

<sup>1</sup>H NMR and <sup>13</sup>C NMR spectra of compound 1t

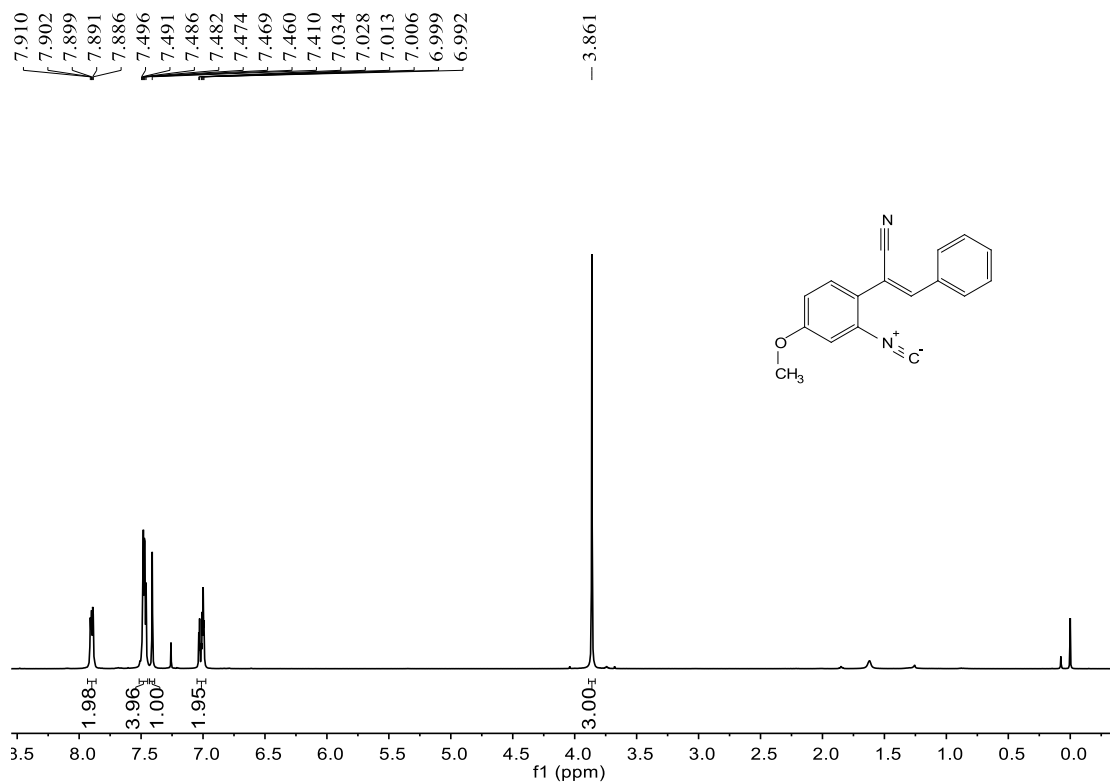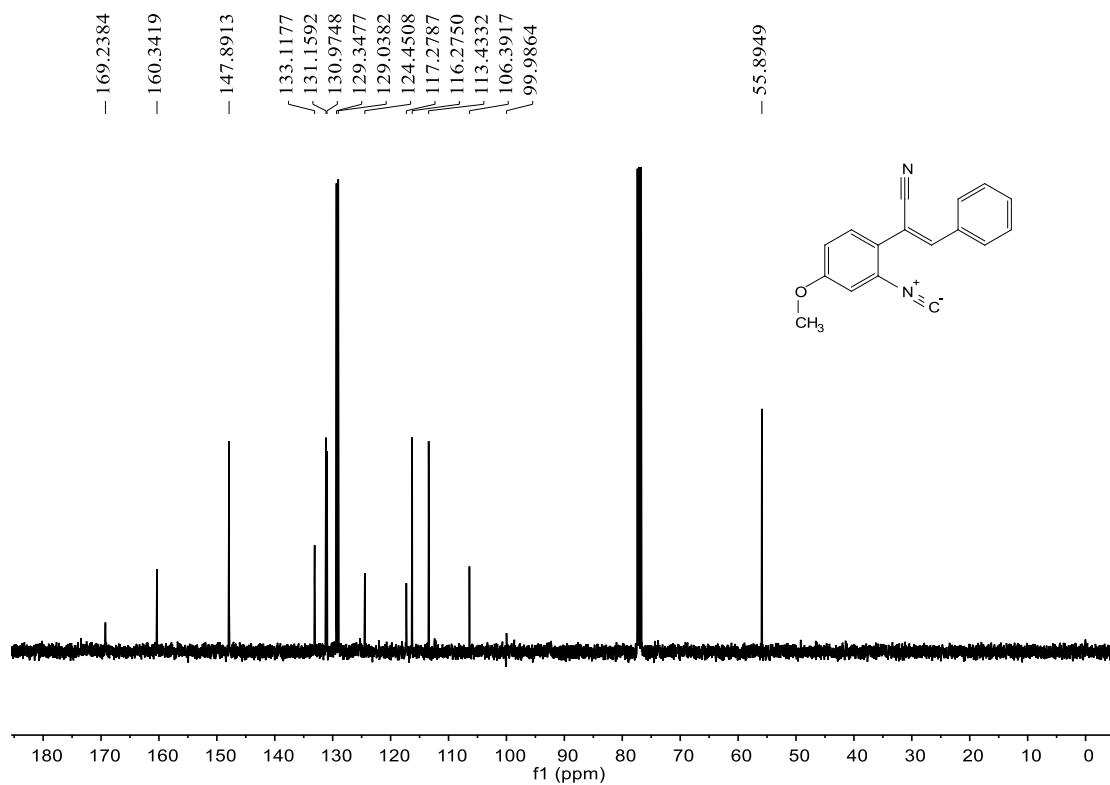

<sup>1</sup>H NMR and <sup>13</sup>C NMR spectra of compound **1u**

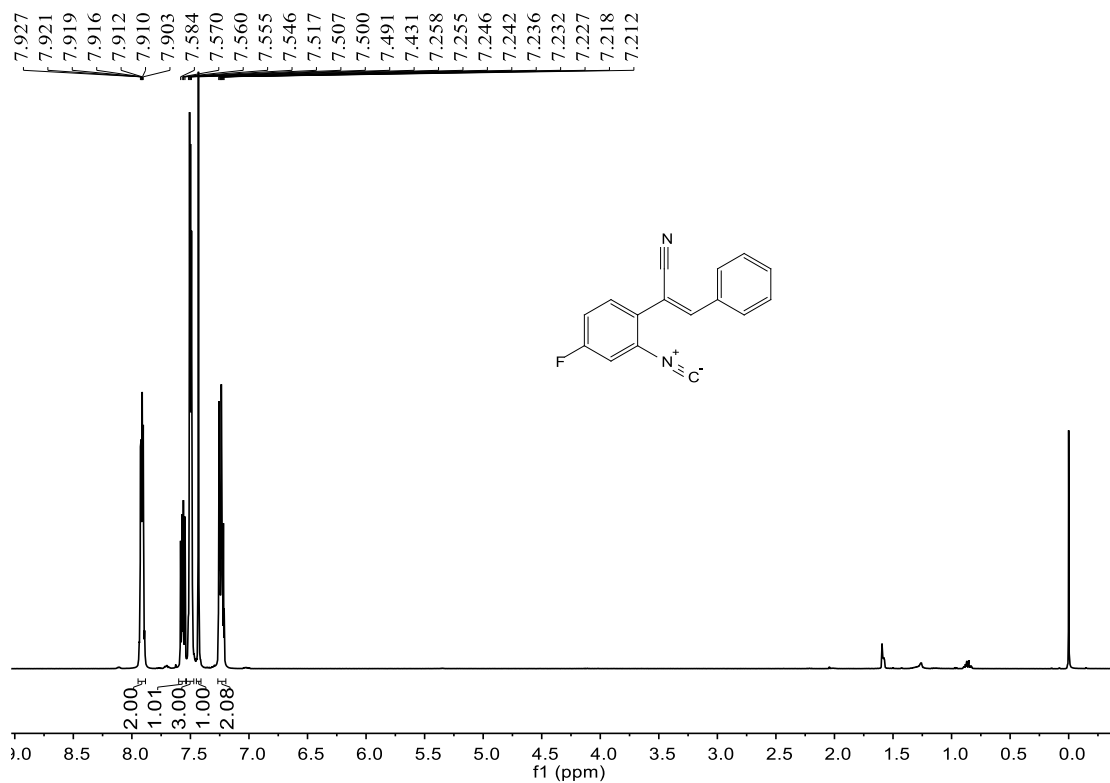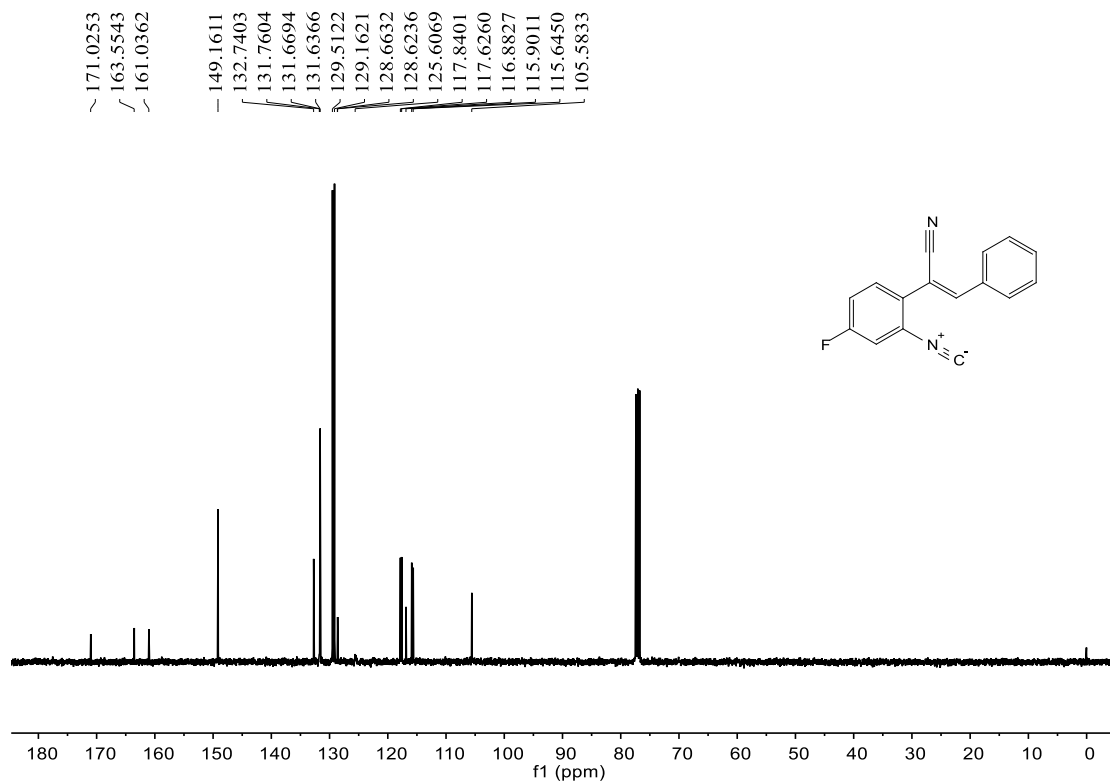

$^1\text{H}$  NMR and  $^{13}\text{C}$  NMR spectra of compound **1v**

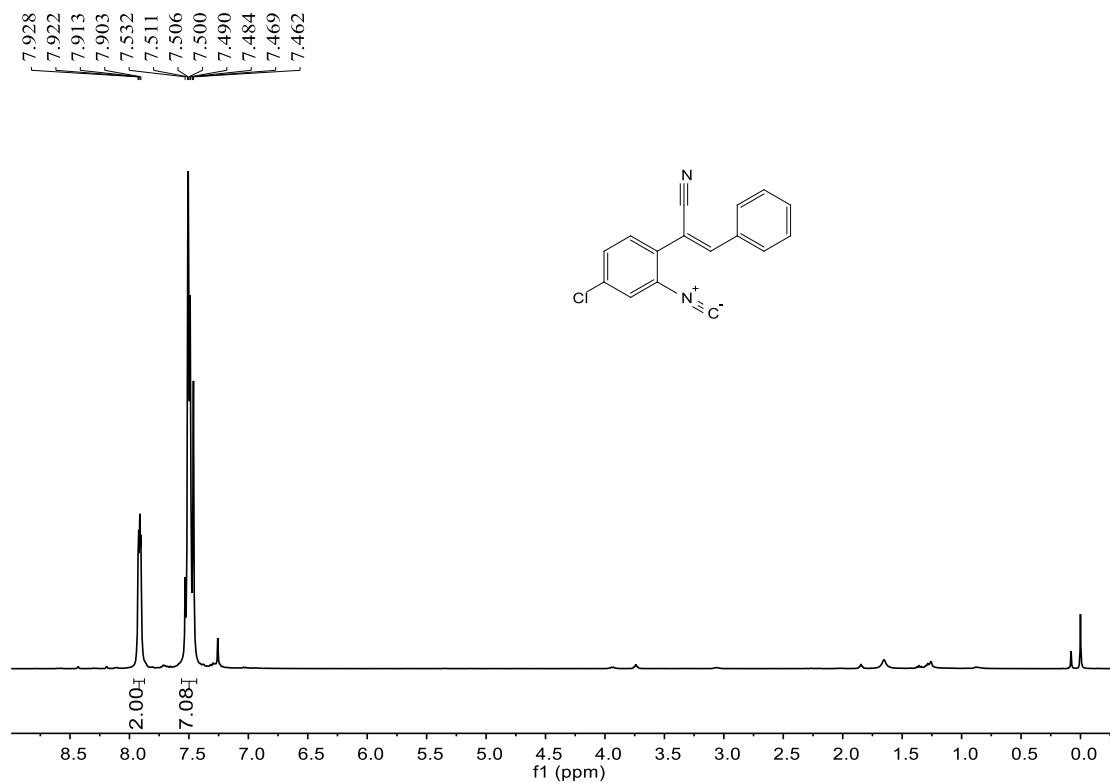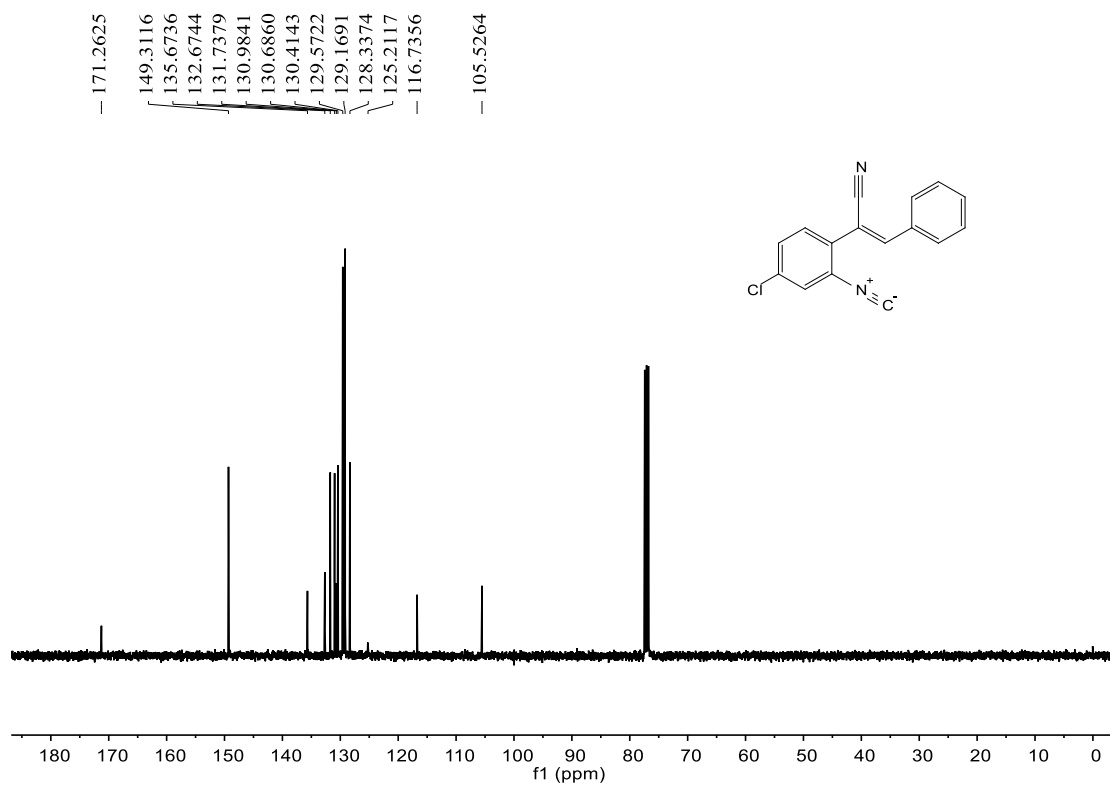



<sup>1</sup>H NMR and <sup>13</sup>C NMR spectra of compound **1w**

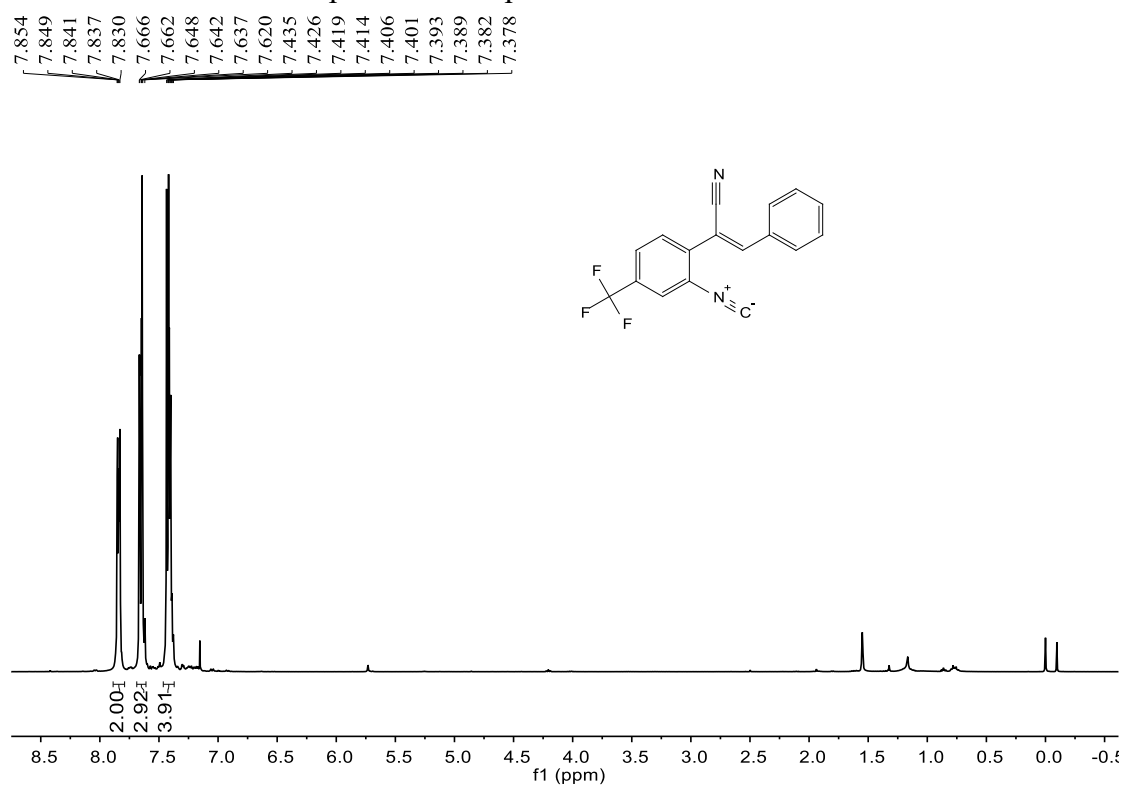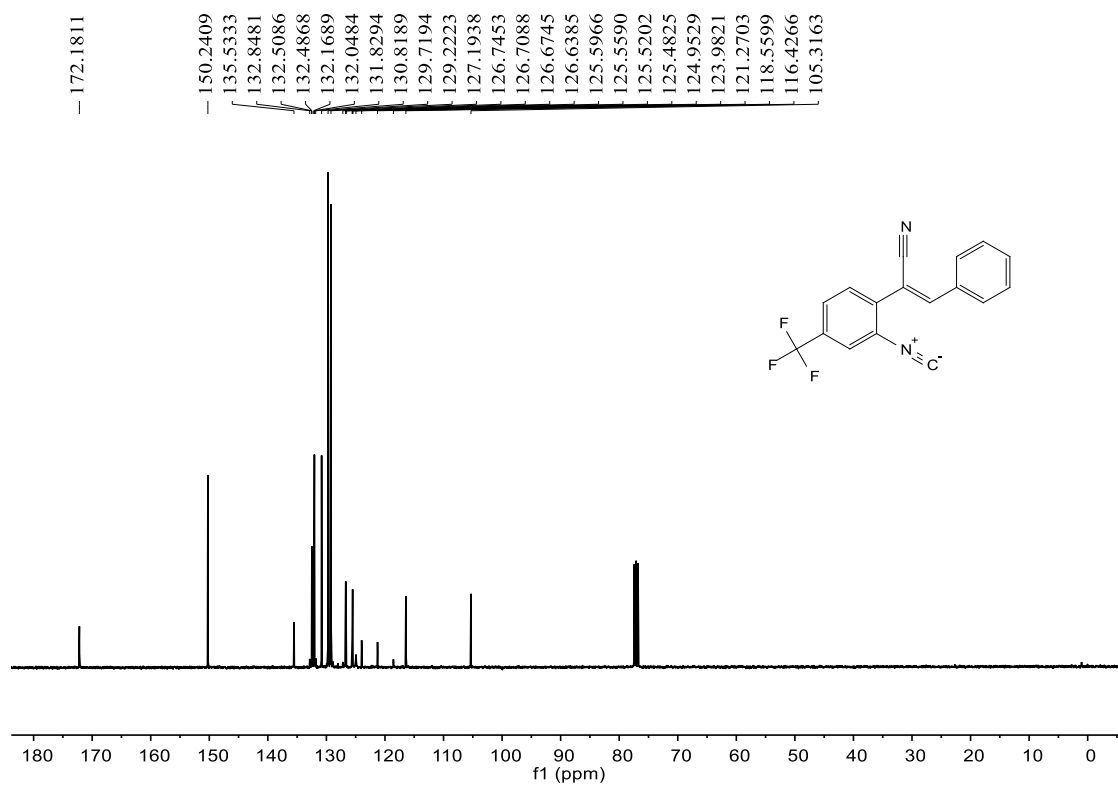

# $^1\text{H}$ NMR and $^{13}\text{C}$ NMR spectra of compound **1x**

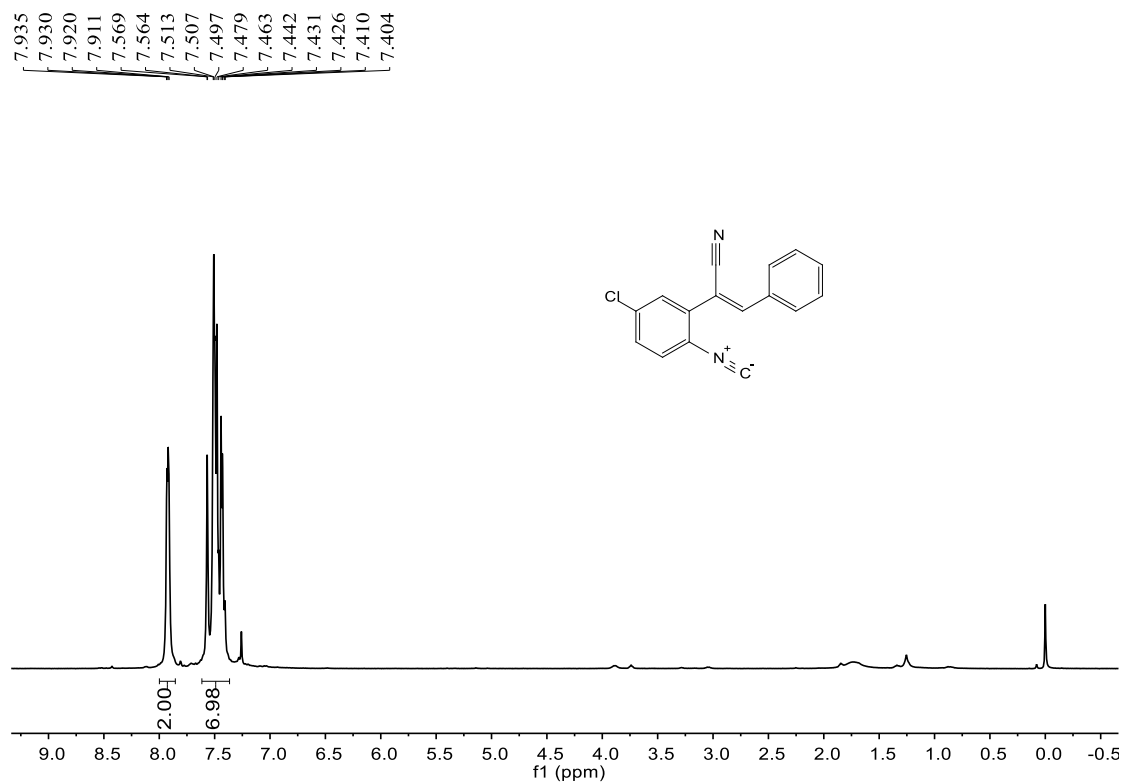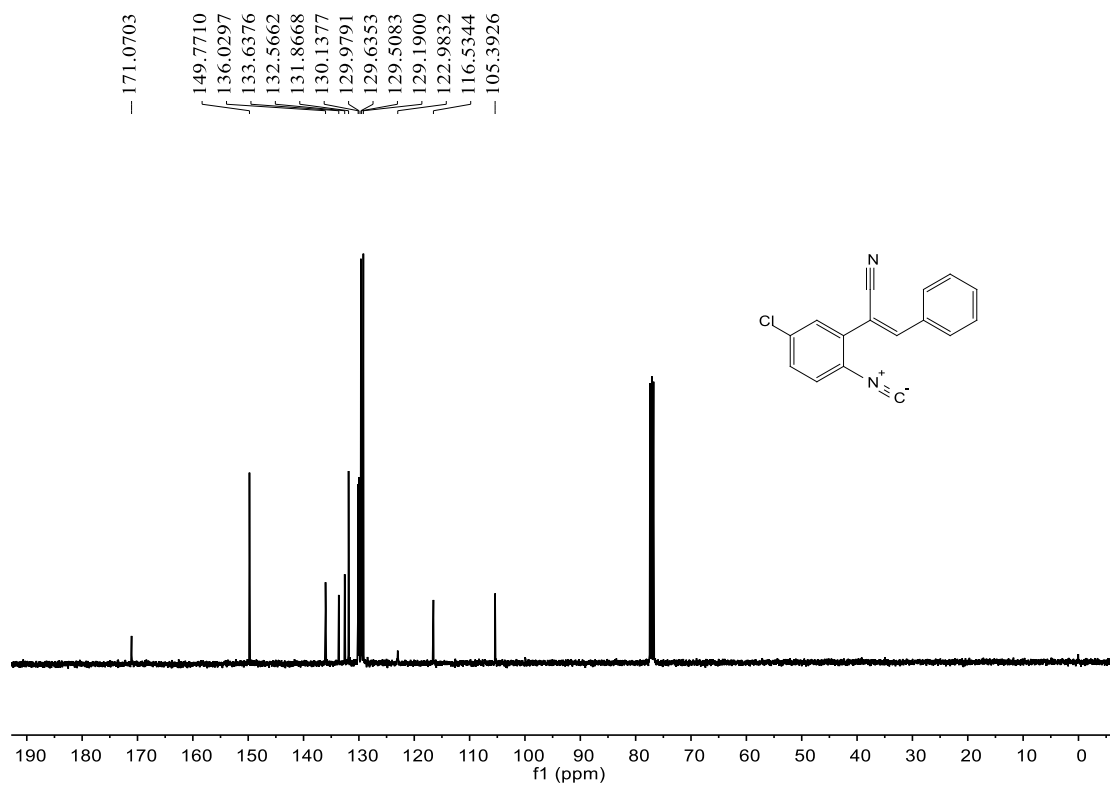

$^1\text{H}$  NMR and  $^{13}\text{C}$  NMR spectra of compound **1y**

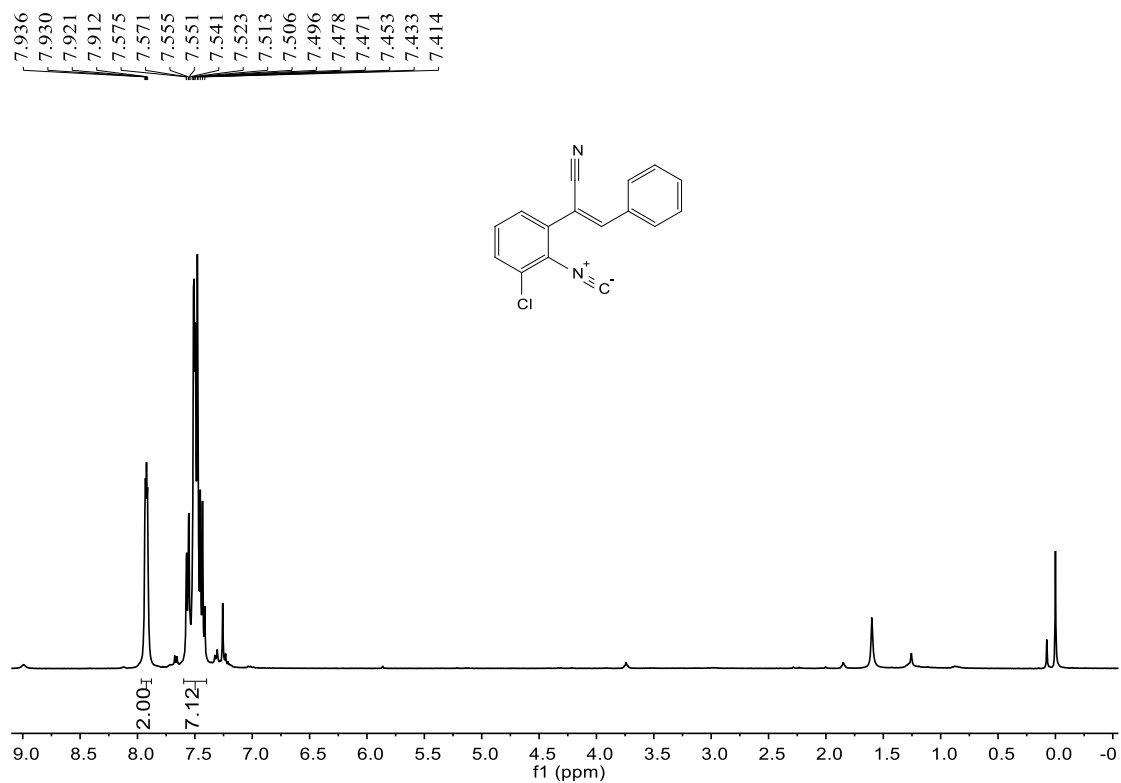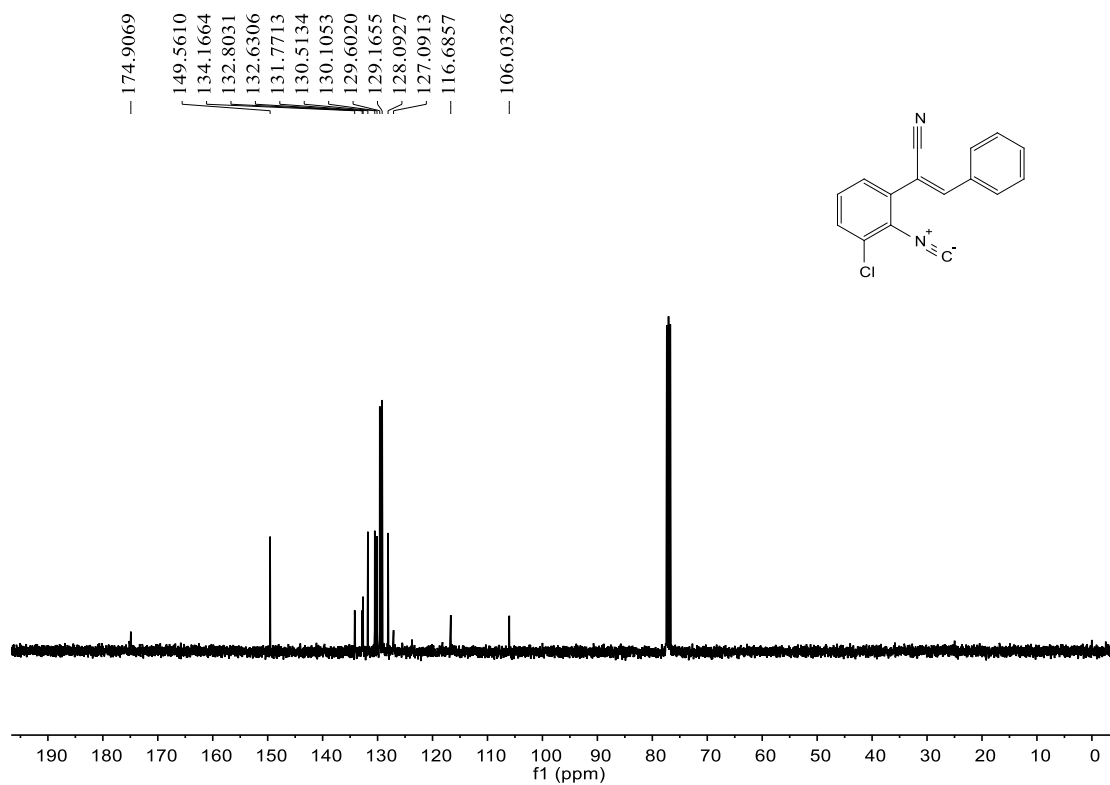

# <sup>1</sup>H NMR and <sup>13</sup>C NMR spectra of compound 1z

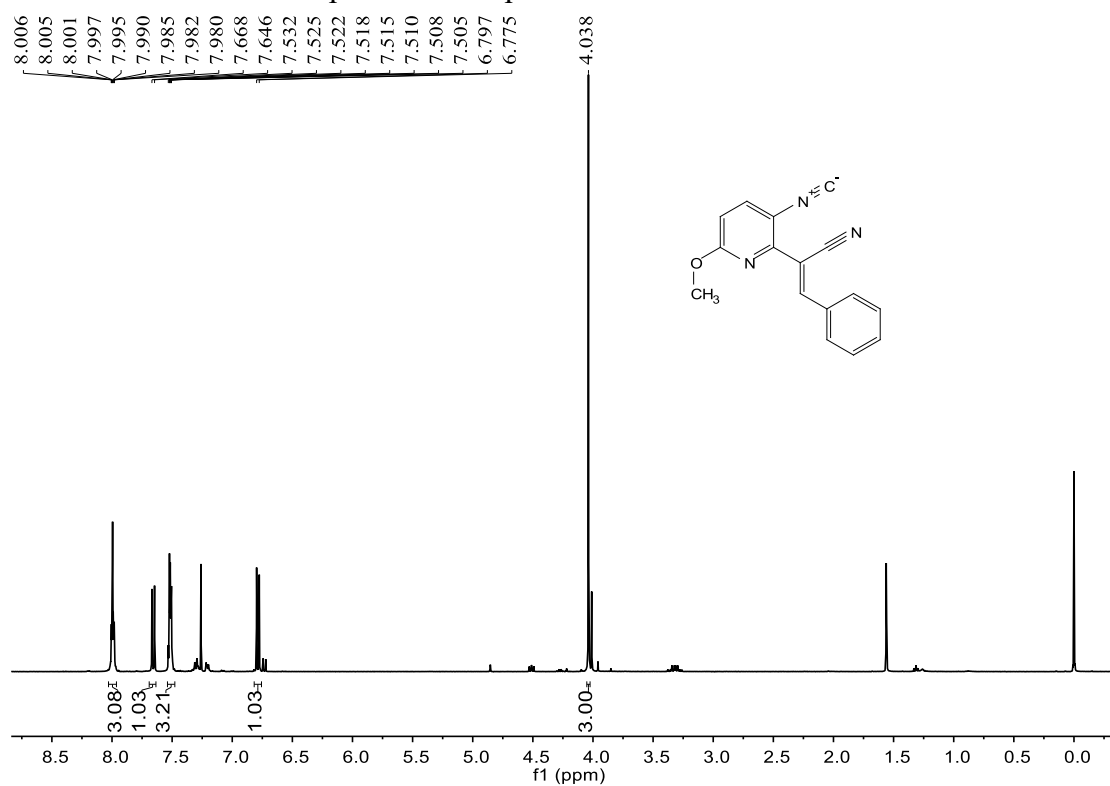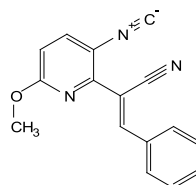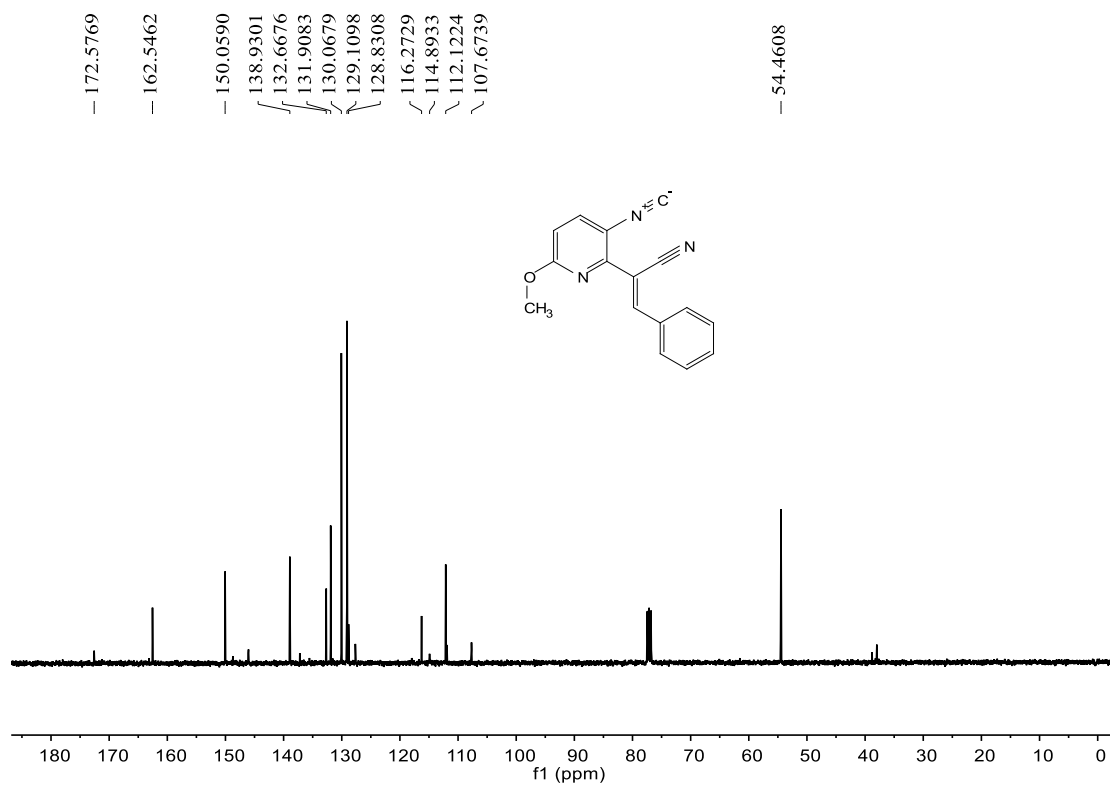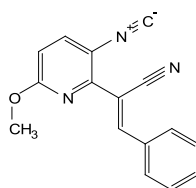

<sup>1</sup>H NMR and <sup>13</sup>C NMR spectra of compound **1aa**

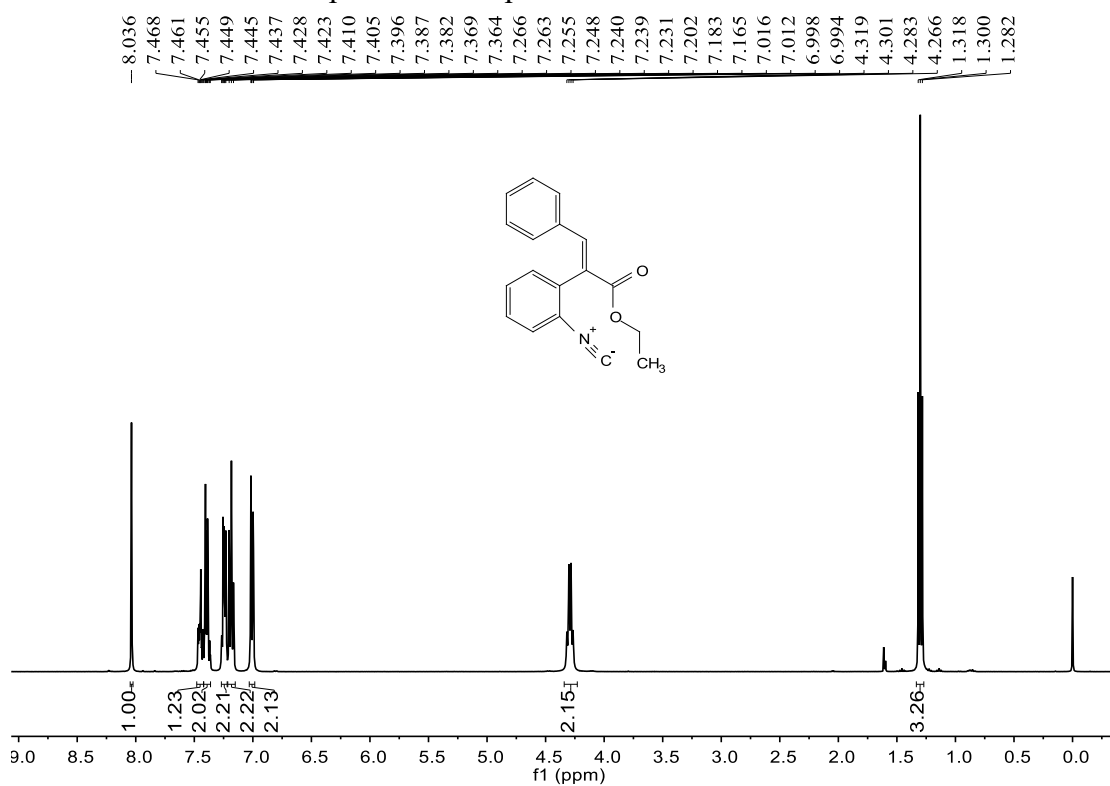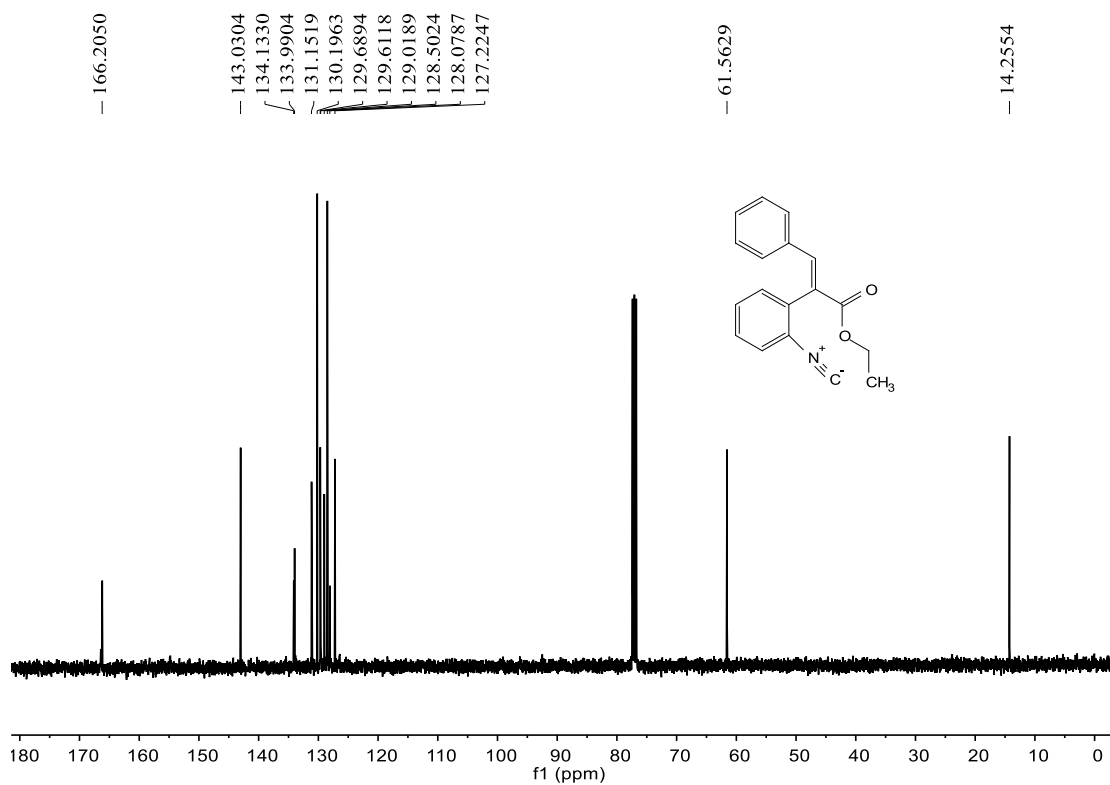

<sup>1</sup>H NMR and <sup>13</sup>C NMR spectra of compound **3aa**

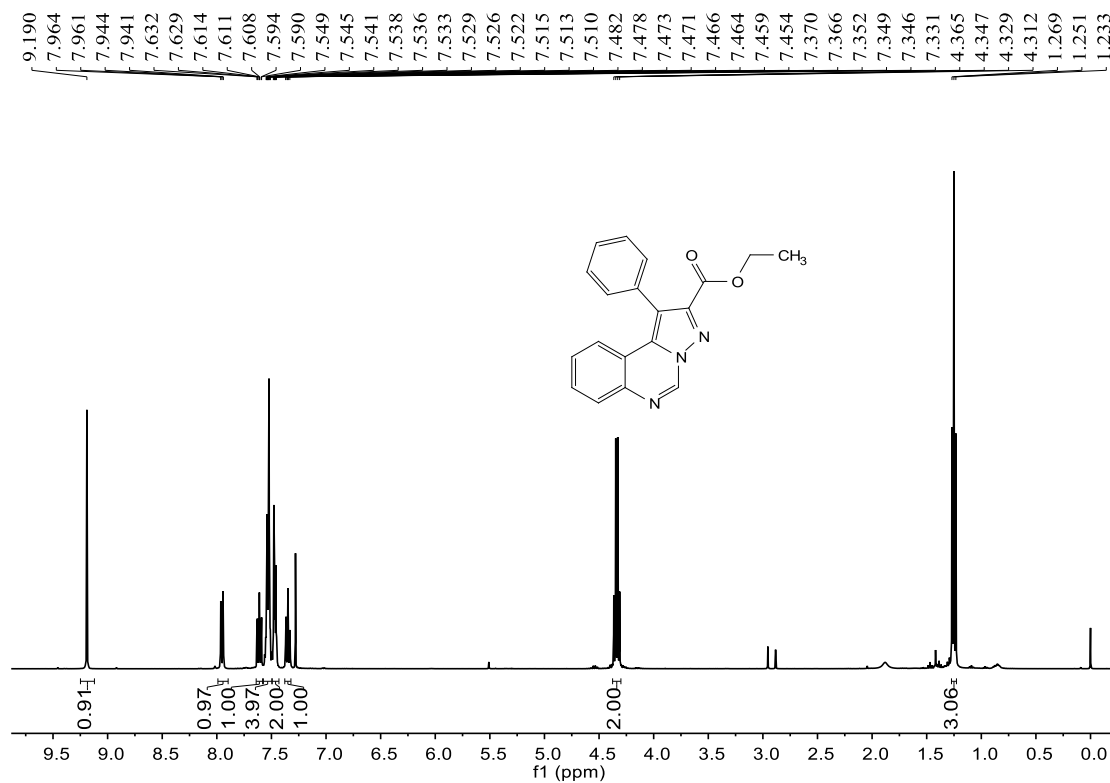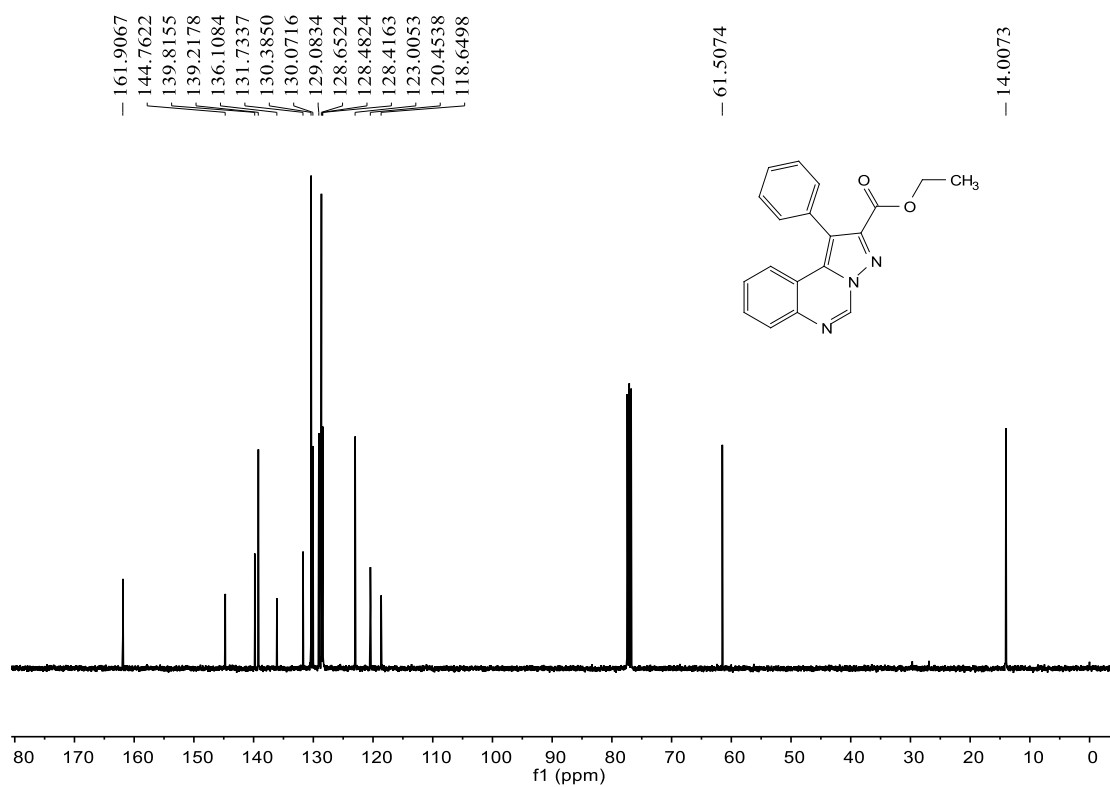

<sup>1</sup>H NMR and <sup>13</sup>C NMR spectra of compound **3ba**

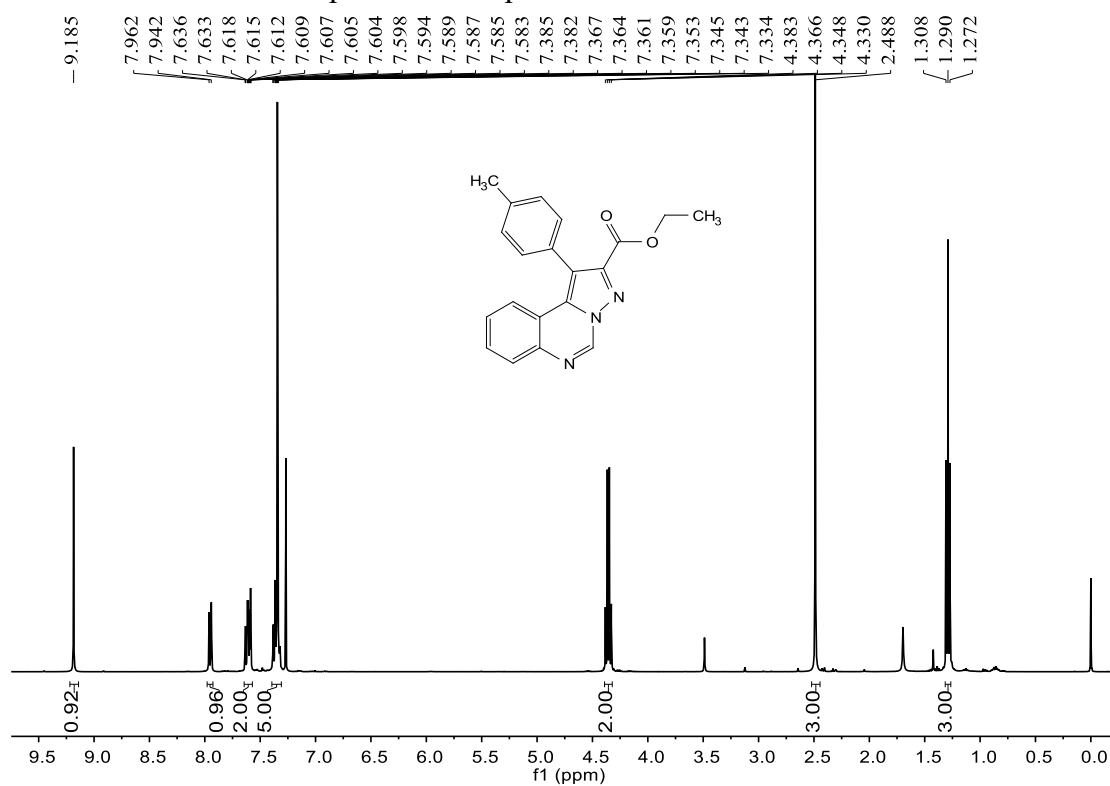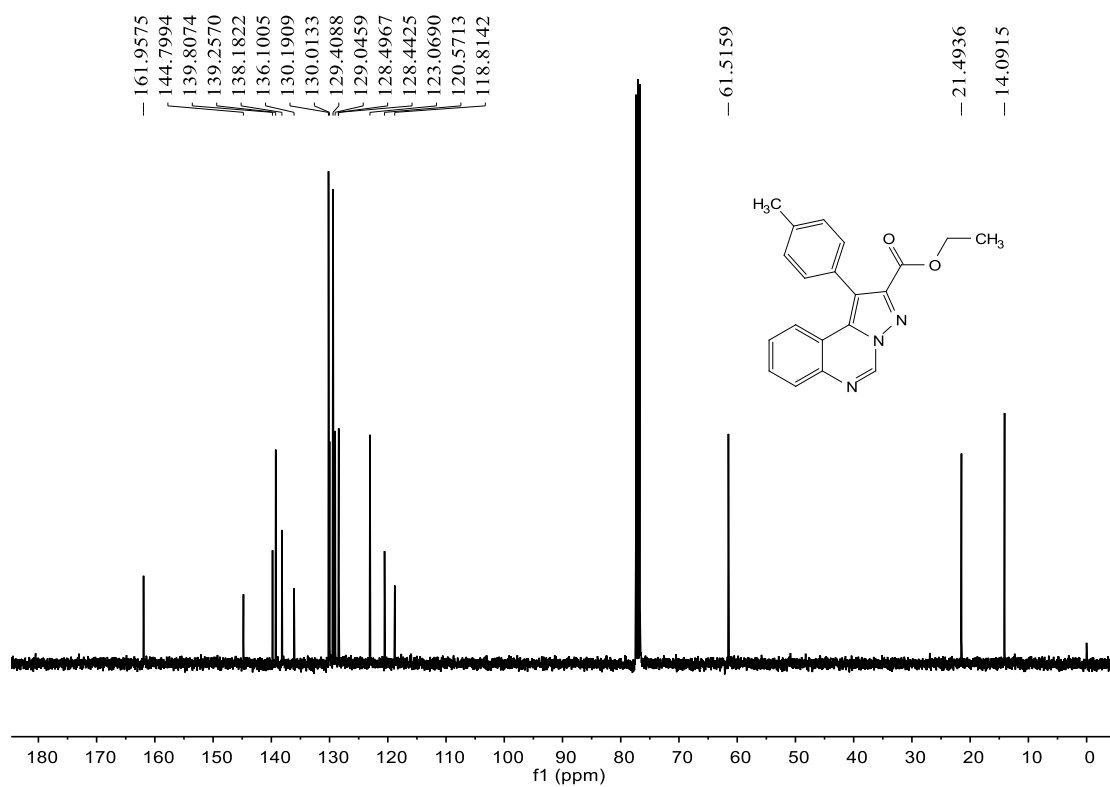

$^1\text{H}$  NMR and  $^{13}\text{C}$  NMR spectra of compound **3ca**

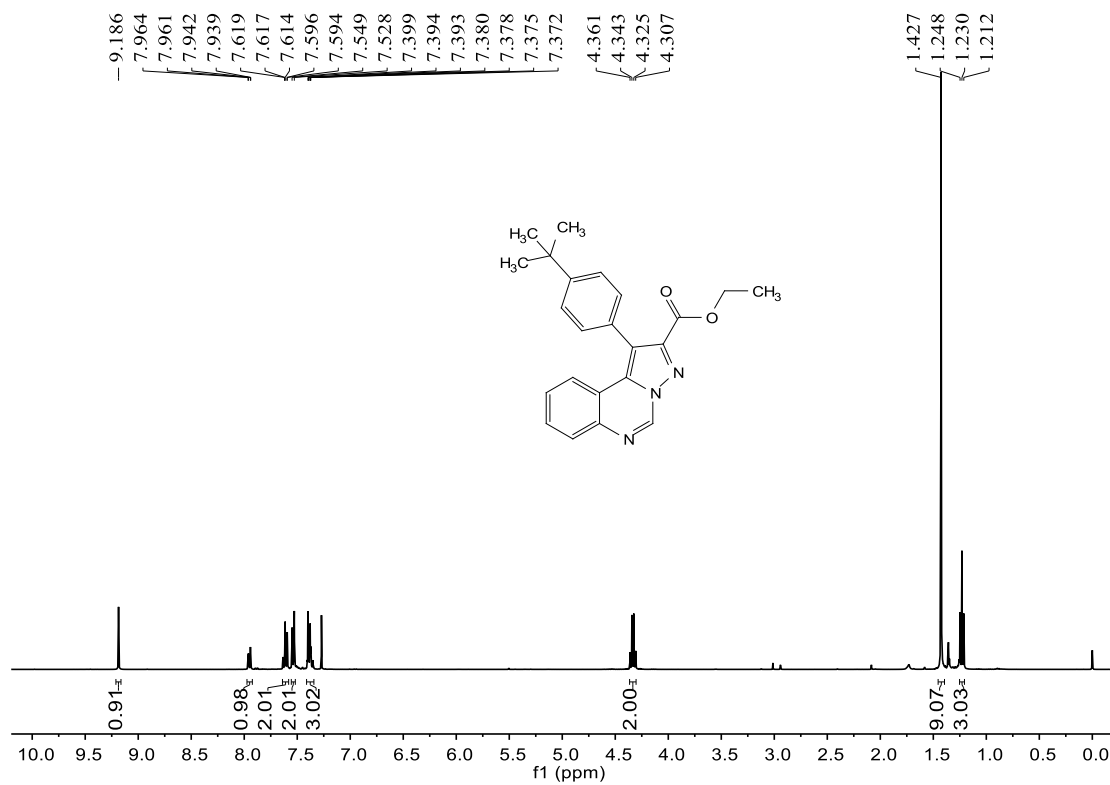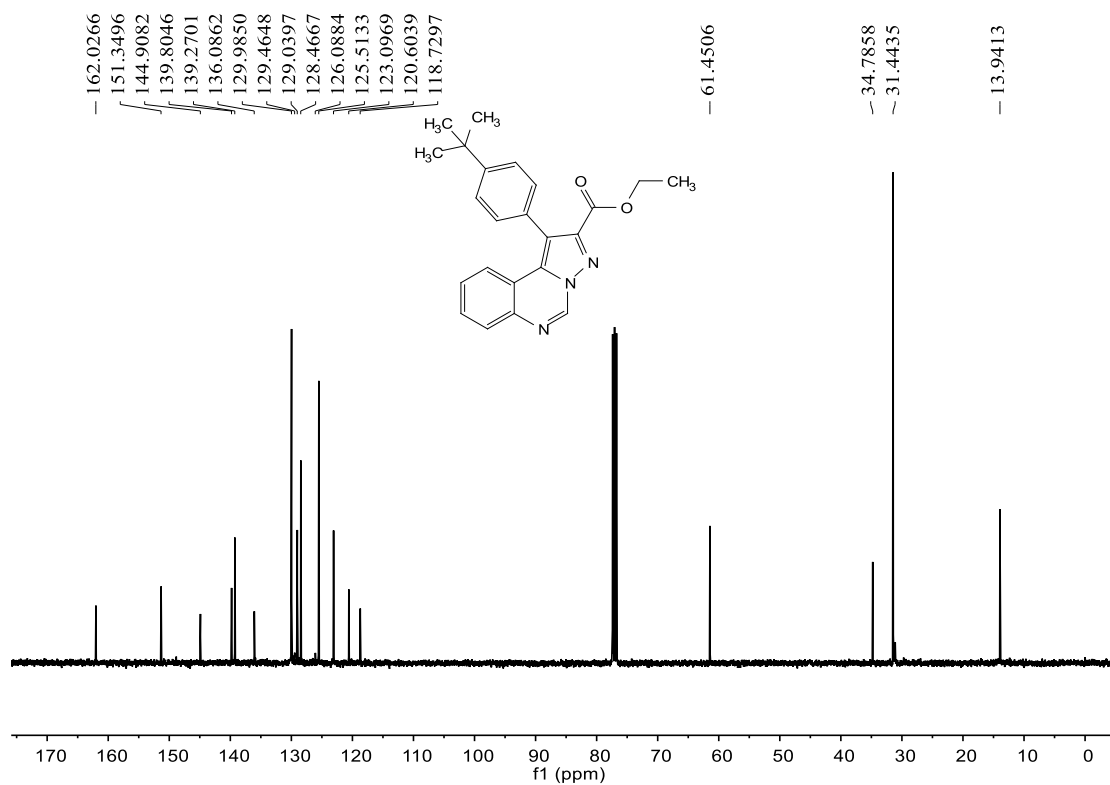



$^1\text{H}$  NMR and  $^{13}\text{C}$  NMR spectra of compound **3da**

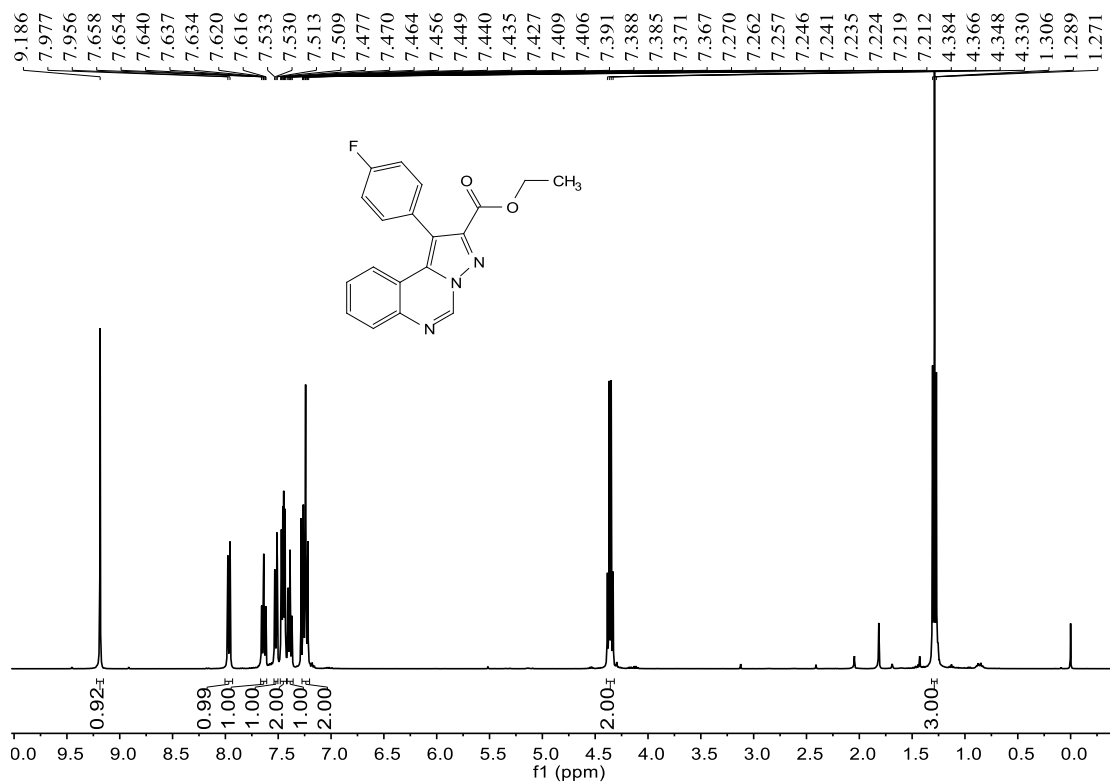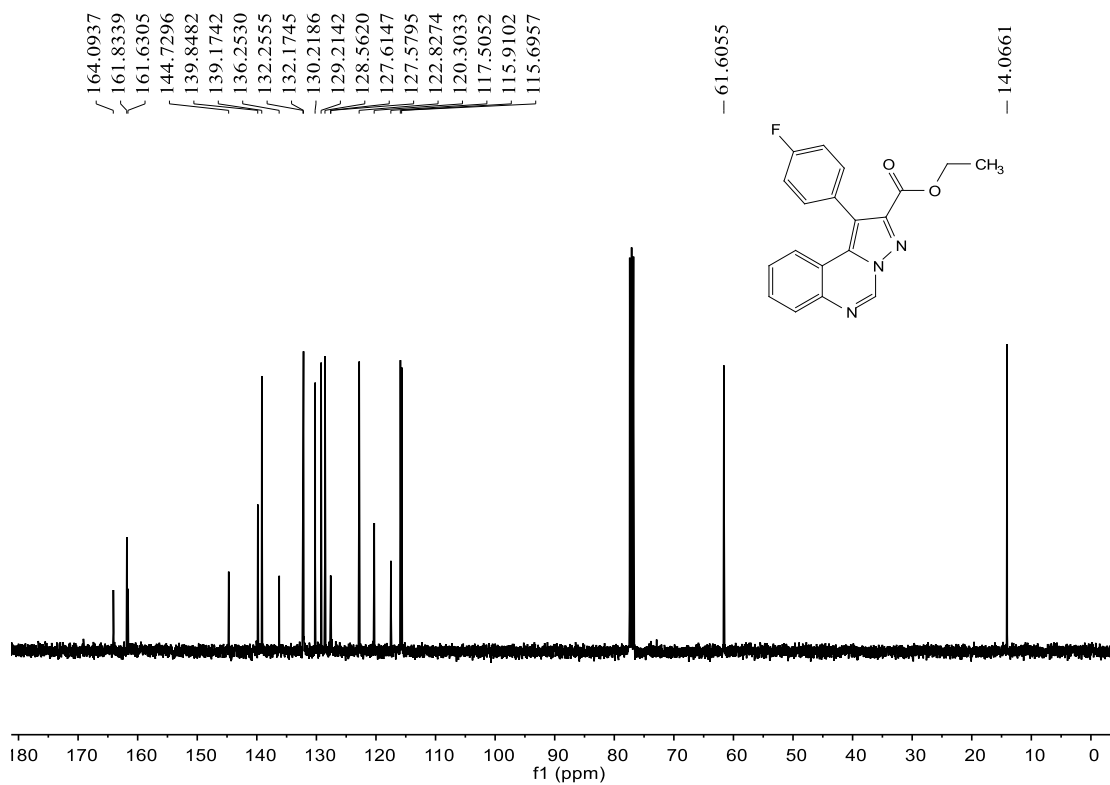

$^1\text{H}$  NMR and  $^{13}\text{C}$  NMR spectra of compound **3ea**

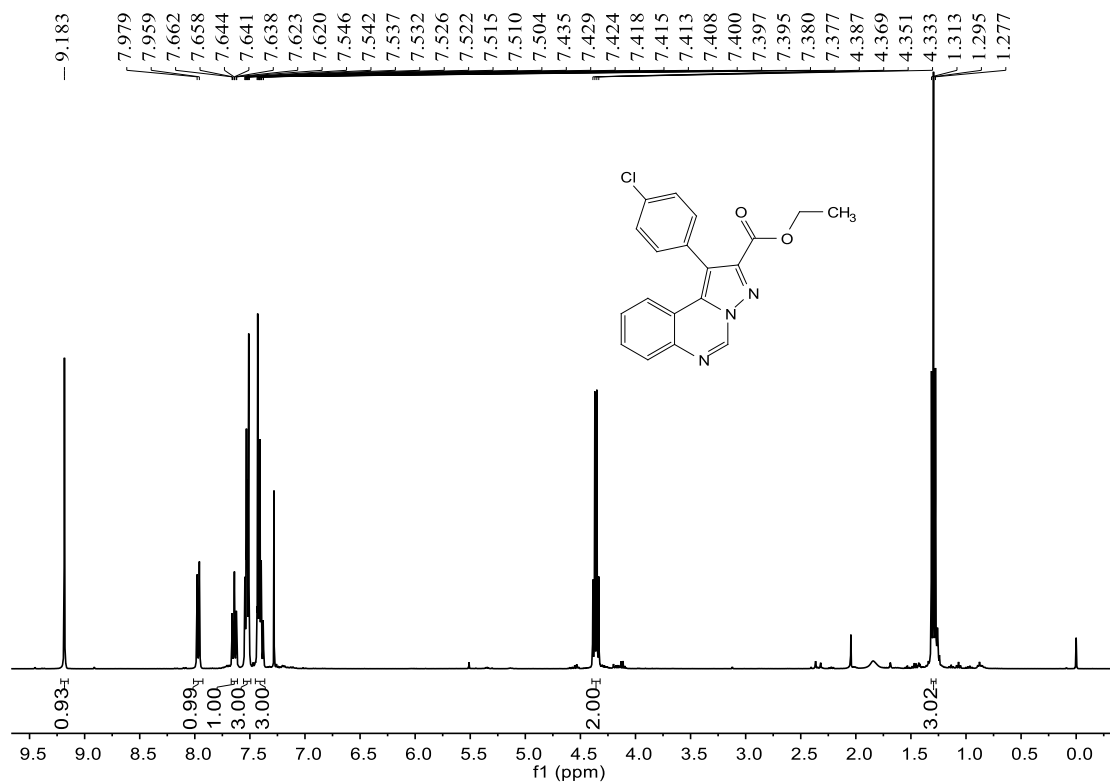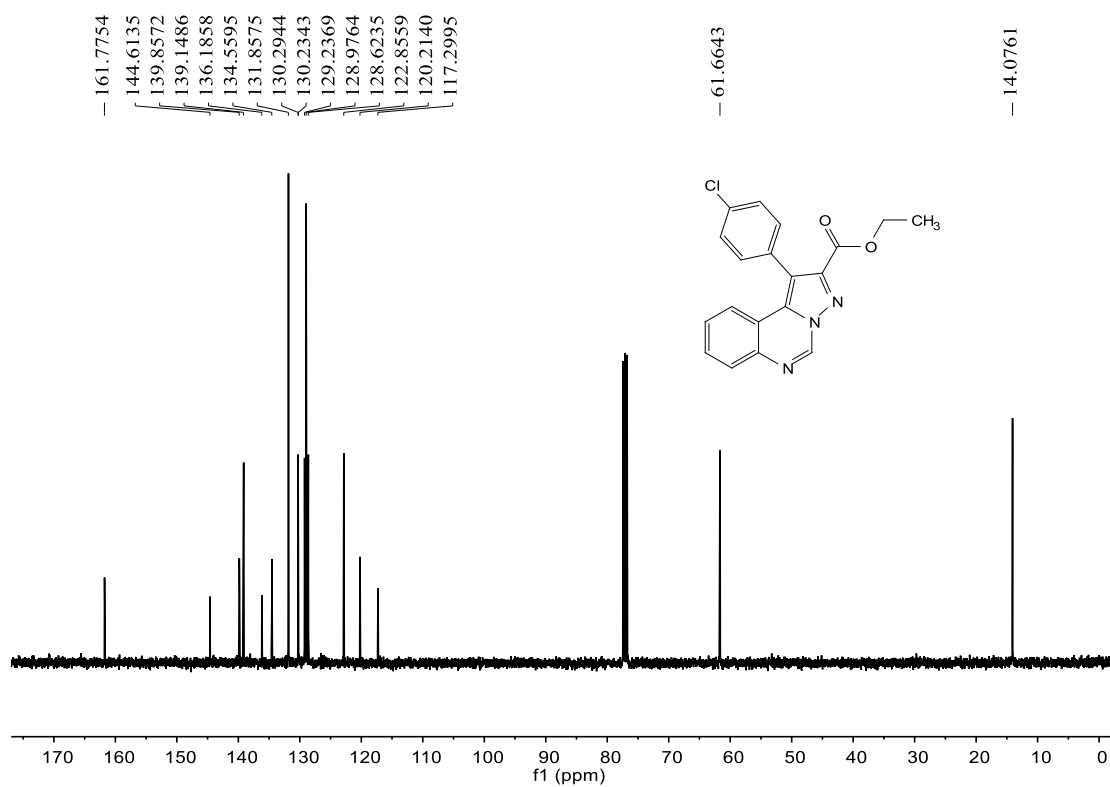

$^1\text{H}$  NMR and  $^{13}\text{C}$  NMR spectra of compound **3fa**

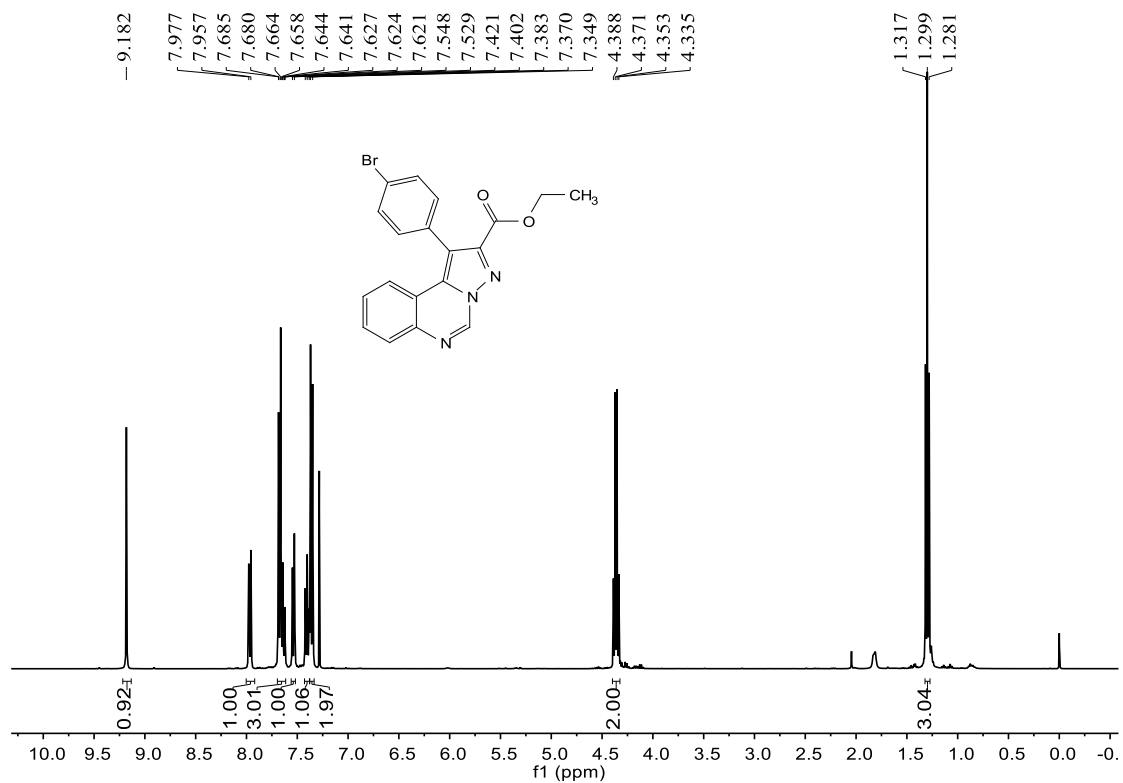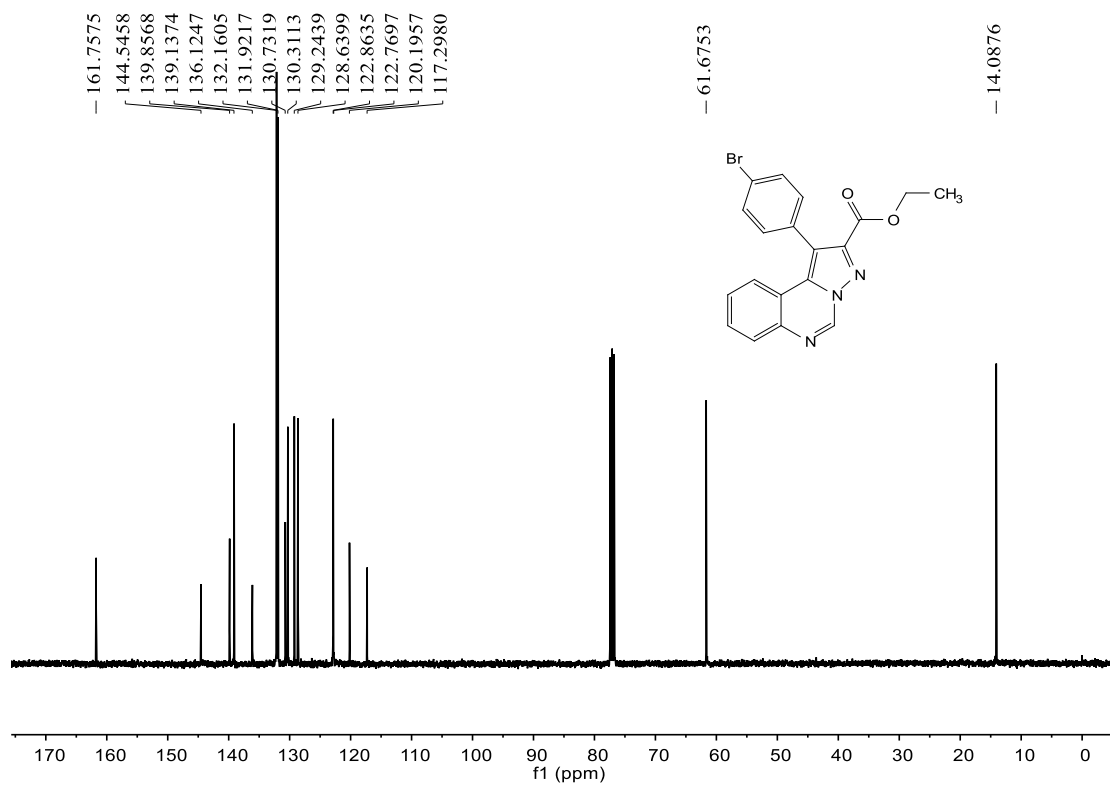

<sup>1</sup>H NMR and <sup>13</sup>C NMR spectra of compound **3ga**

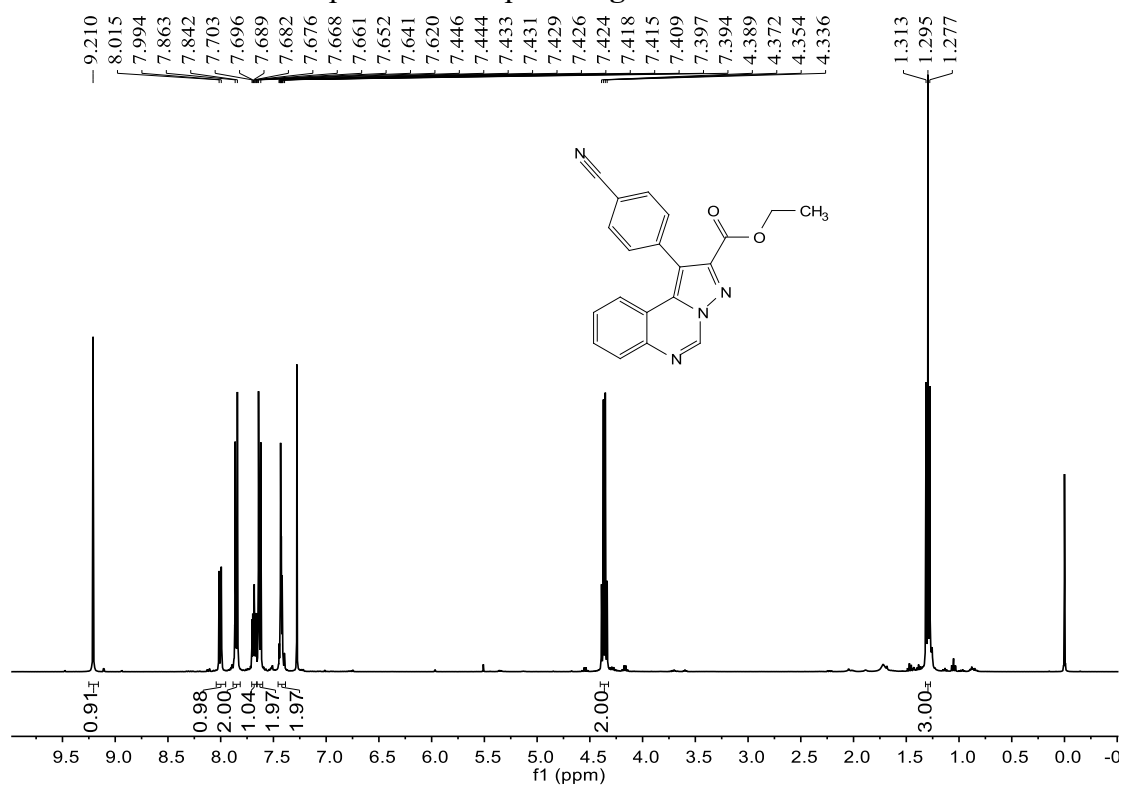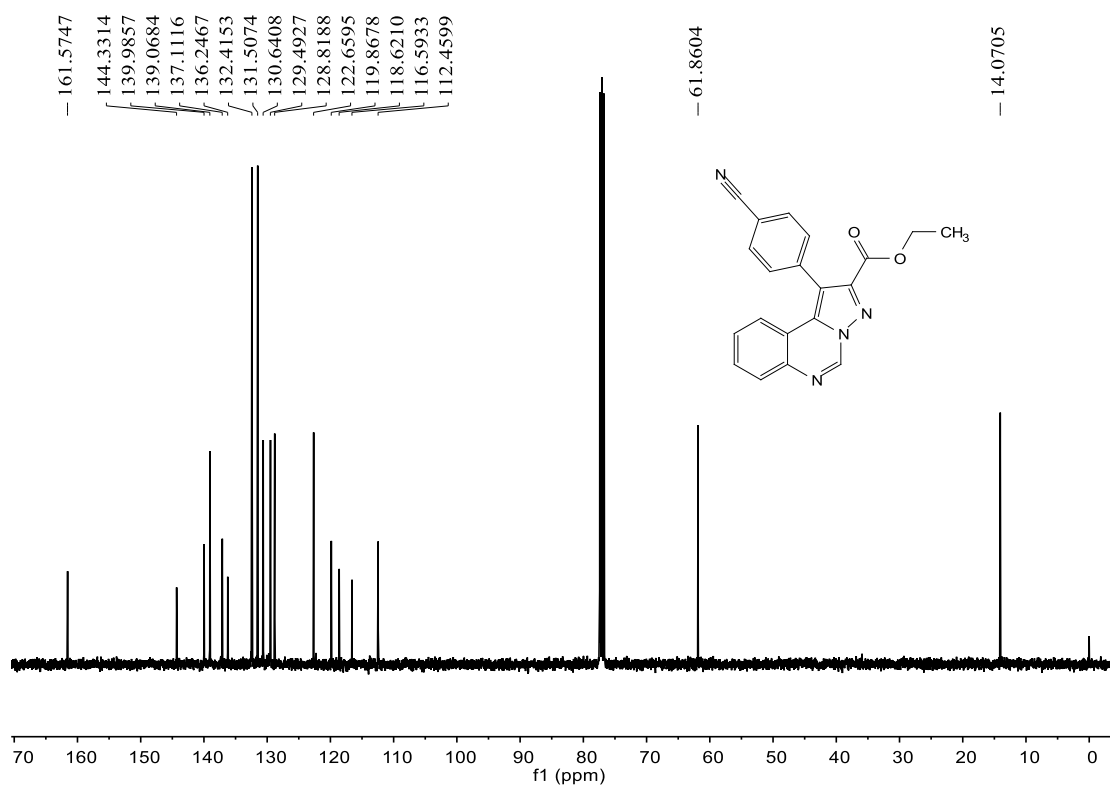

$^1\text{H}$  NMR and  $^{13}\text{C}$  NMR spectra of compound **3ha**

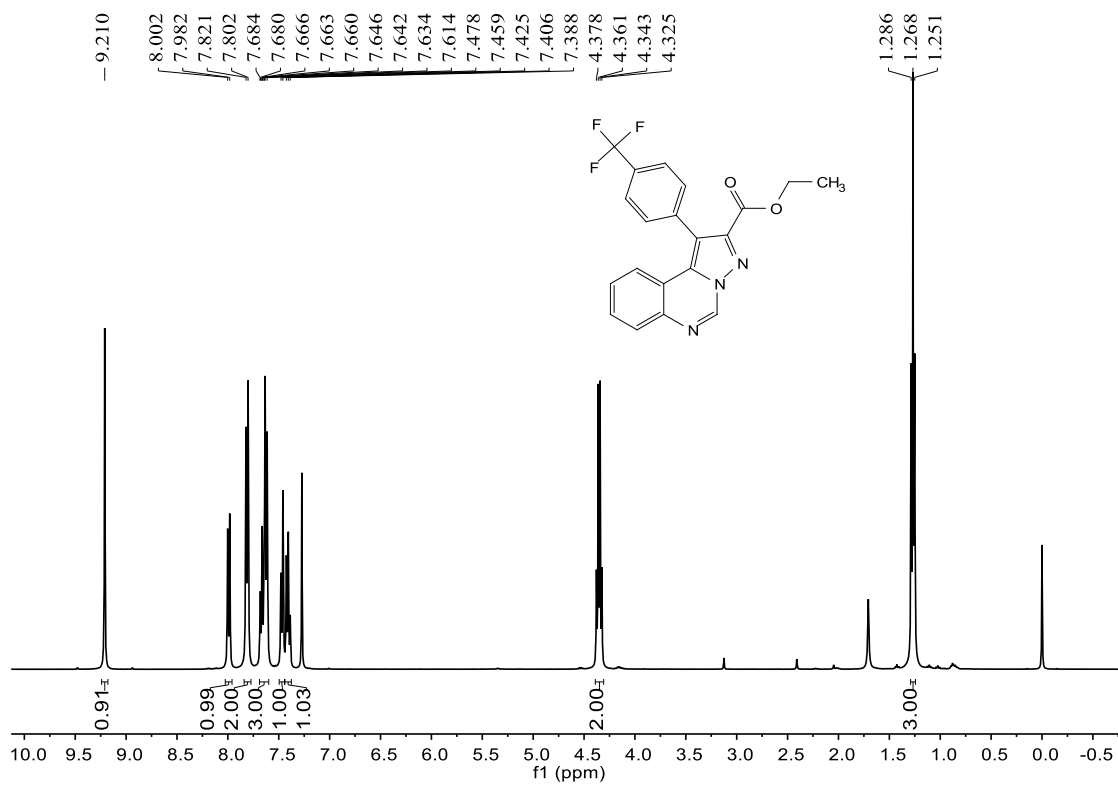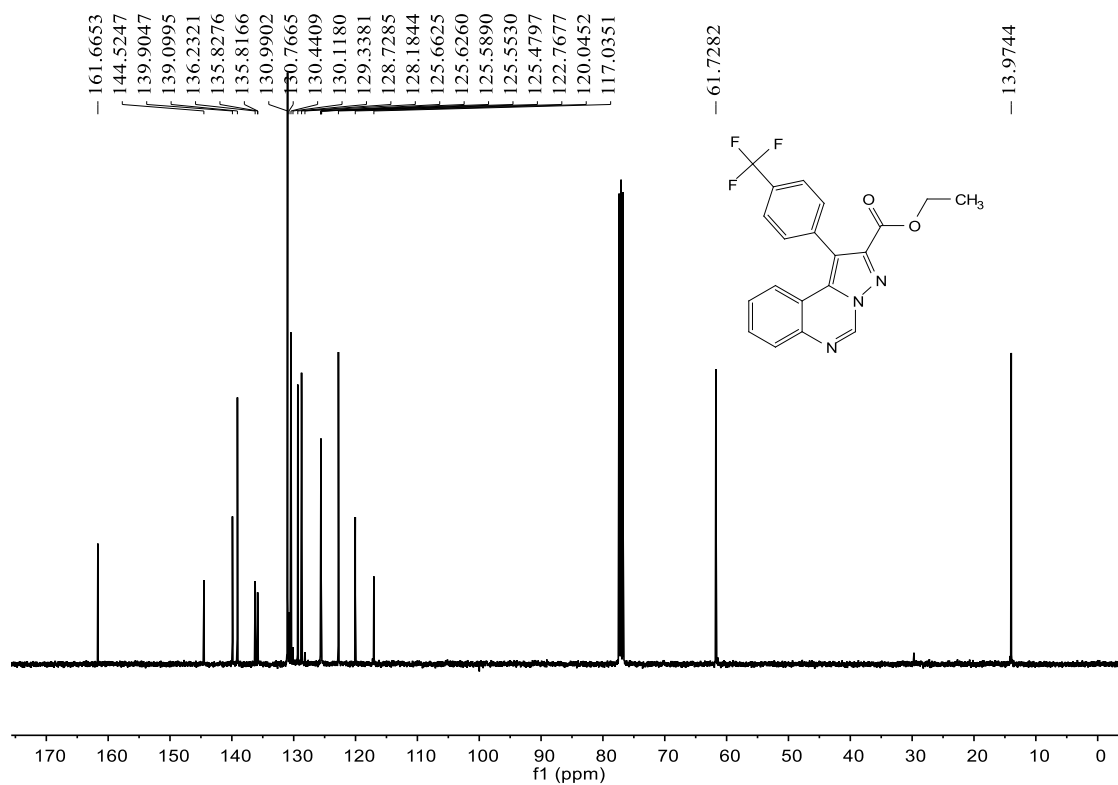

$^1\text{H}$  NMR and  $^{13}\text{C}$  NMR spectra of compound **3ia**

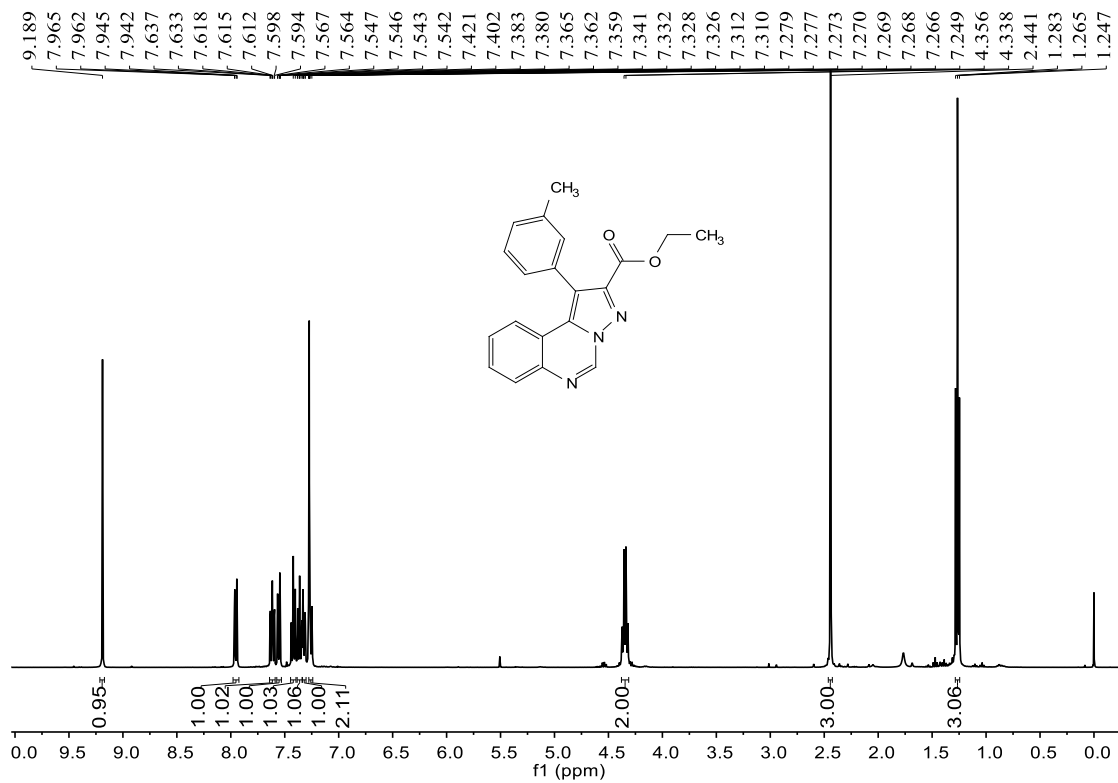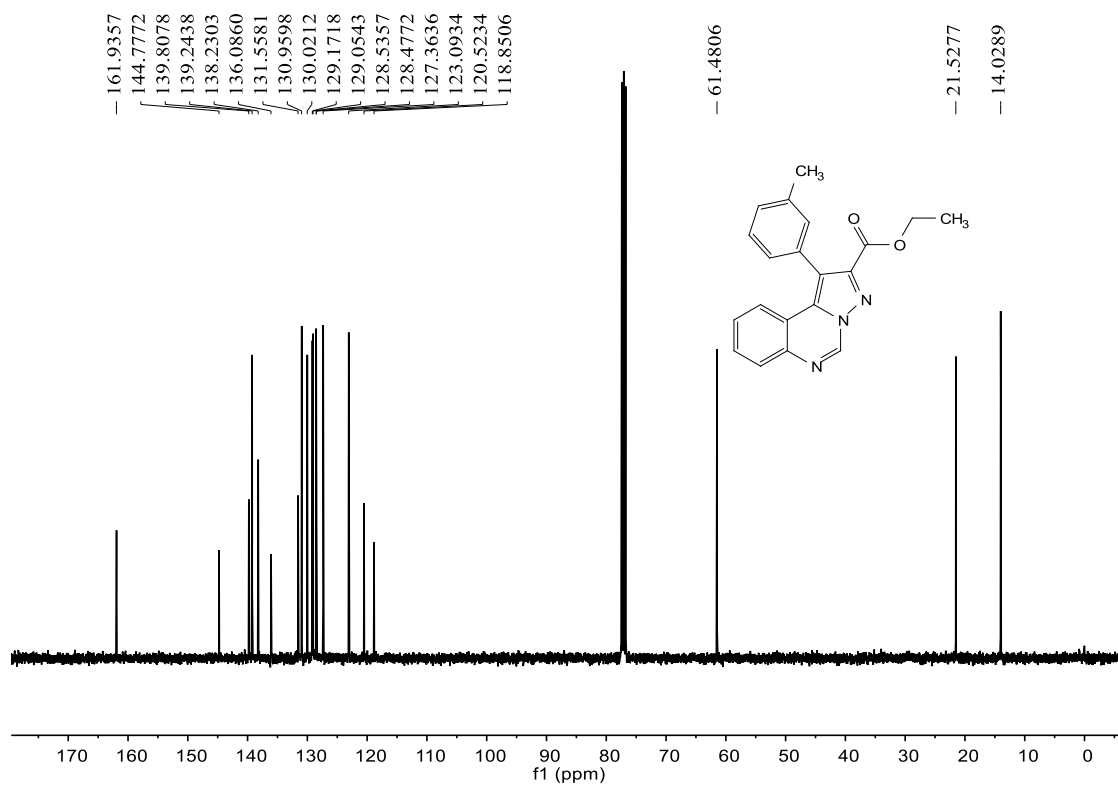

$^1\text{H}$  NMR and  $^{13}\text{C}$  NMR spectra of compound **3ja**

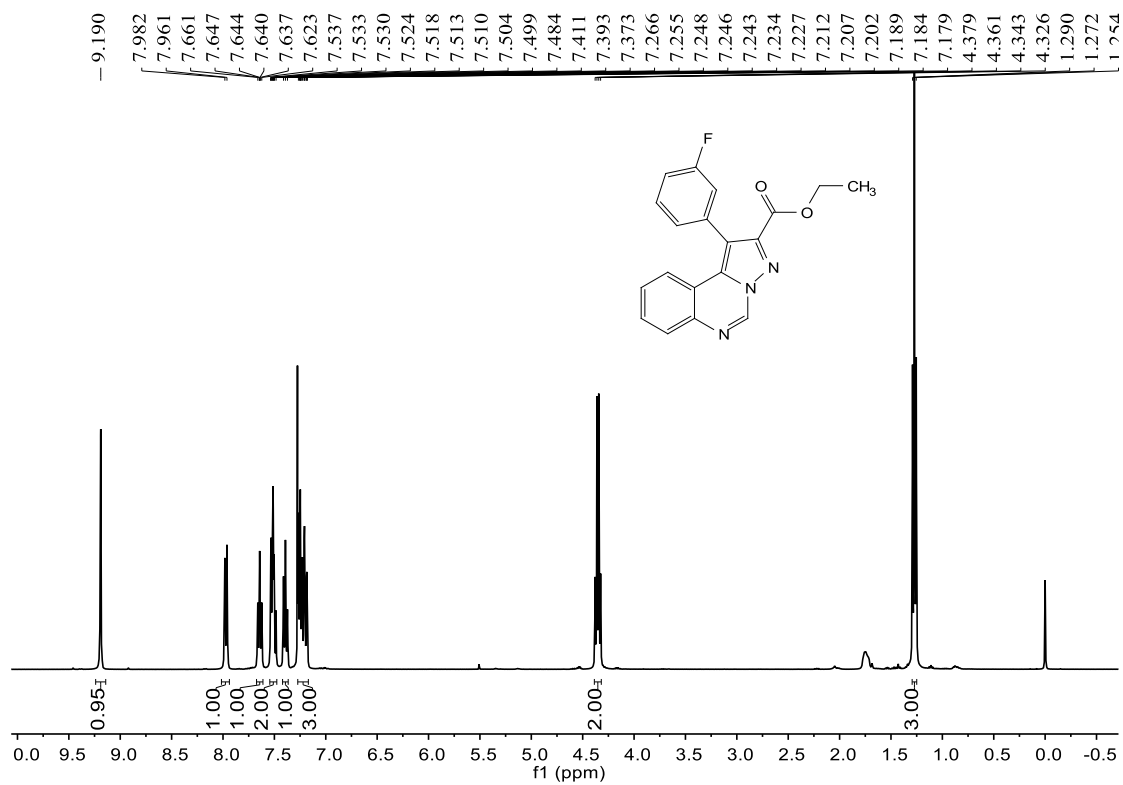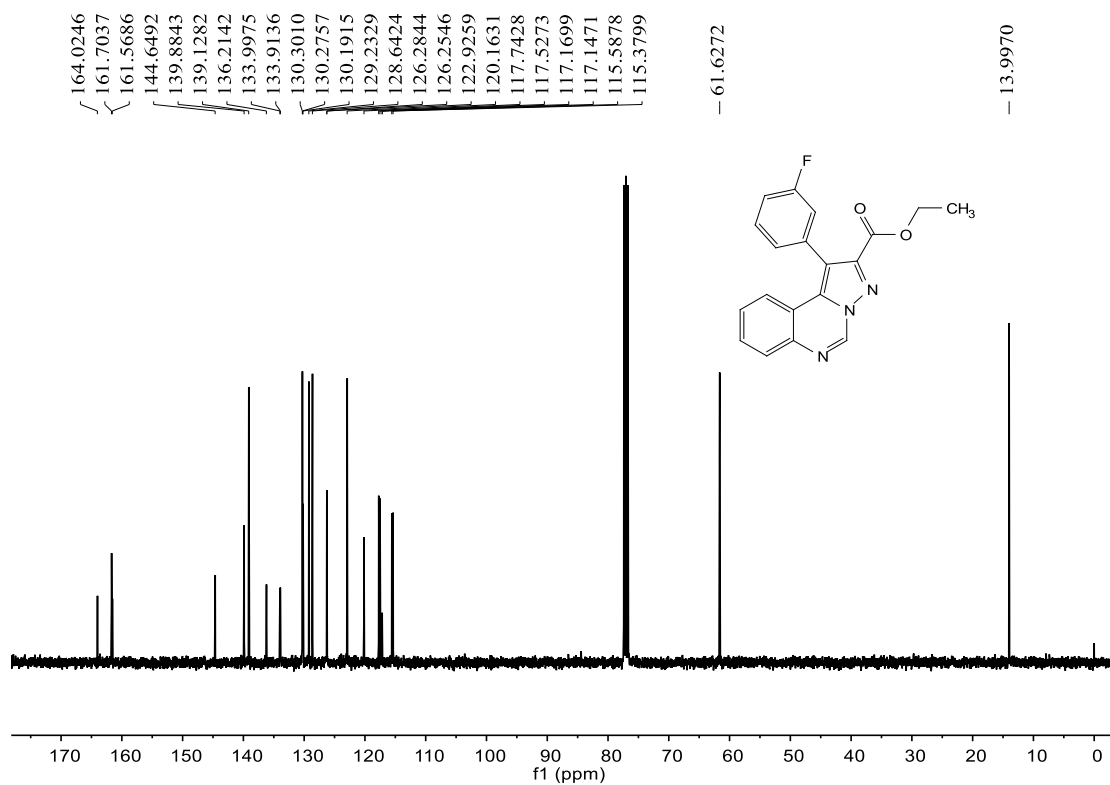

<sup>1</sup>H NMR and <sup>13</sup>C NMR spectra of compound **3ka**

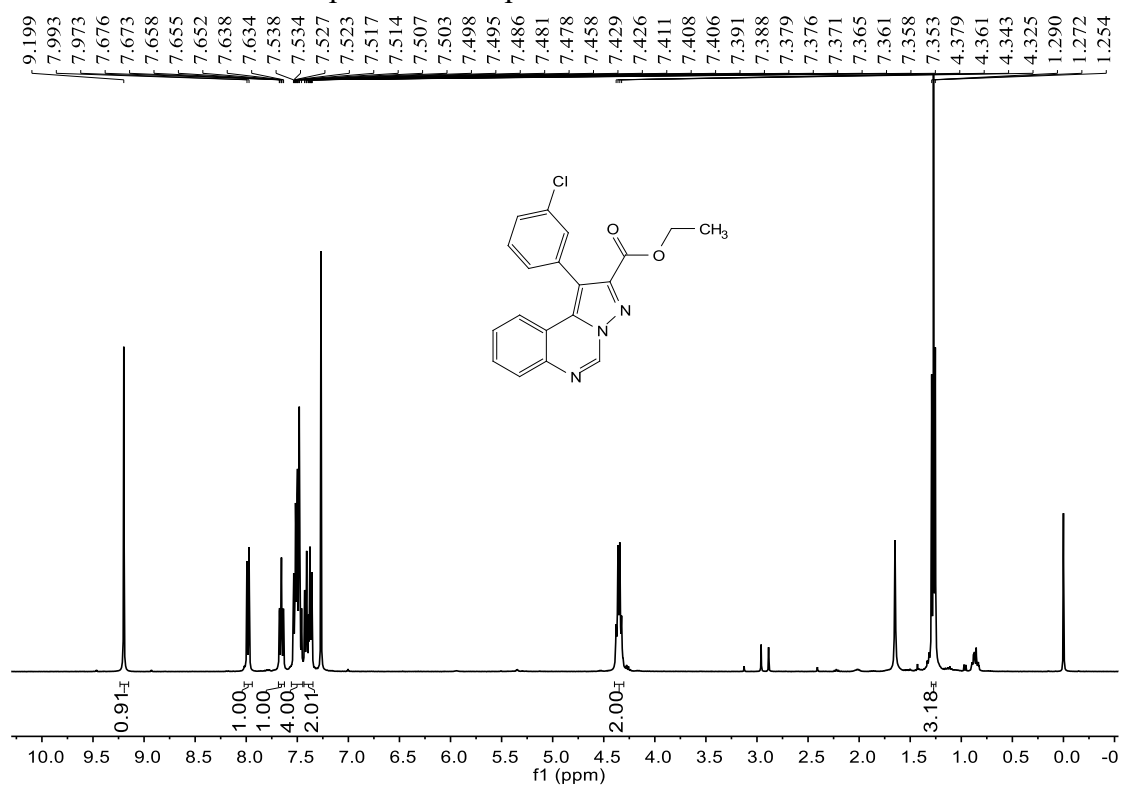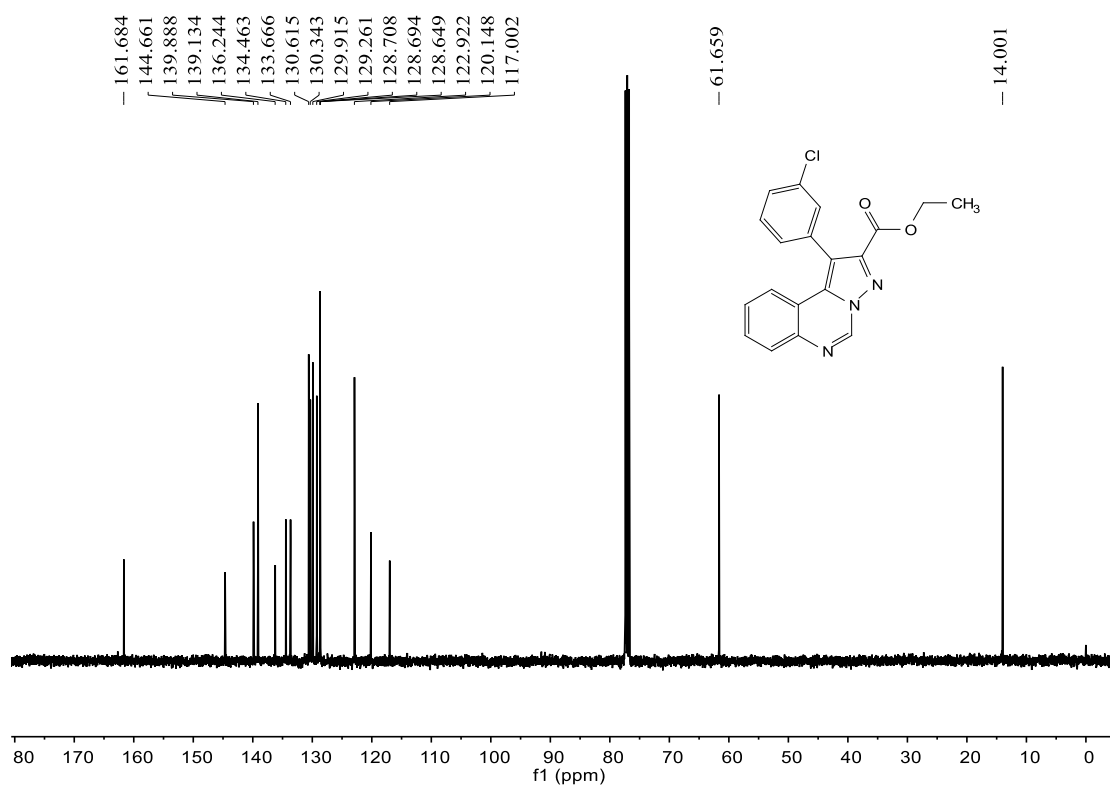



$^1\text{H}$  NMR and  $^{13}\text{C}$  NMR spectra of compound **3la**

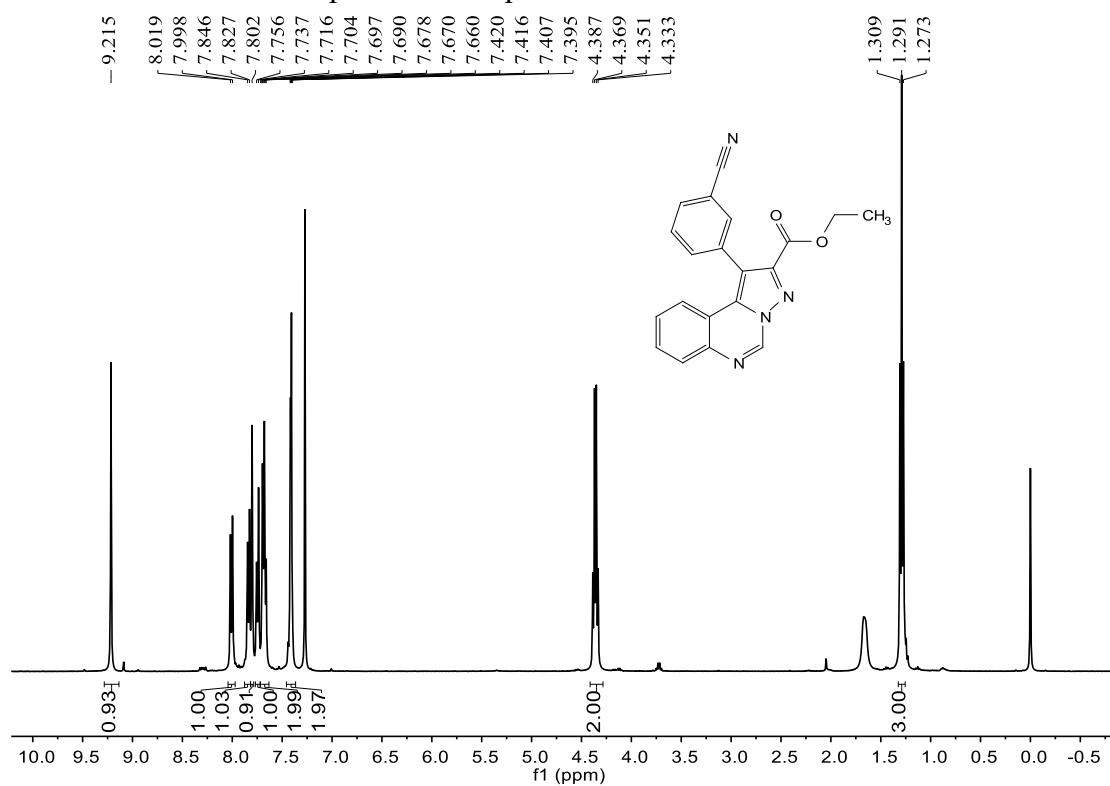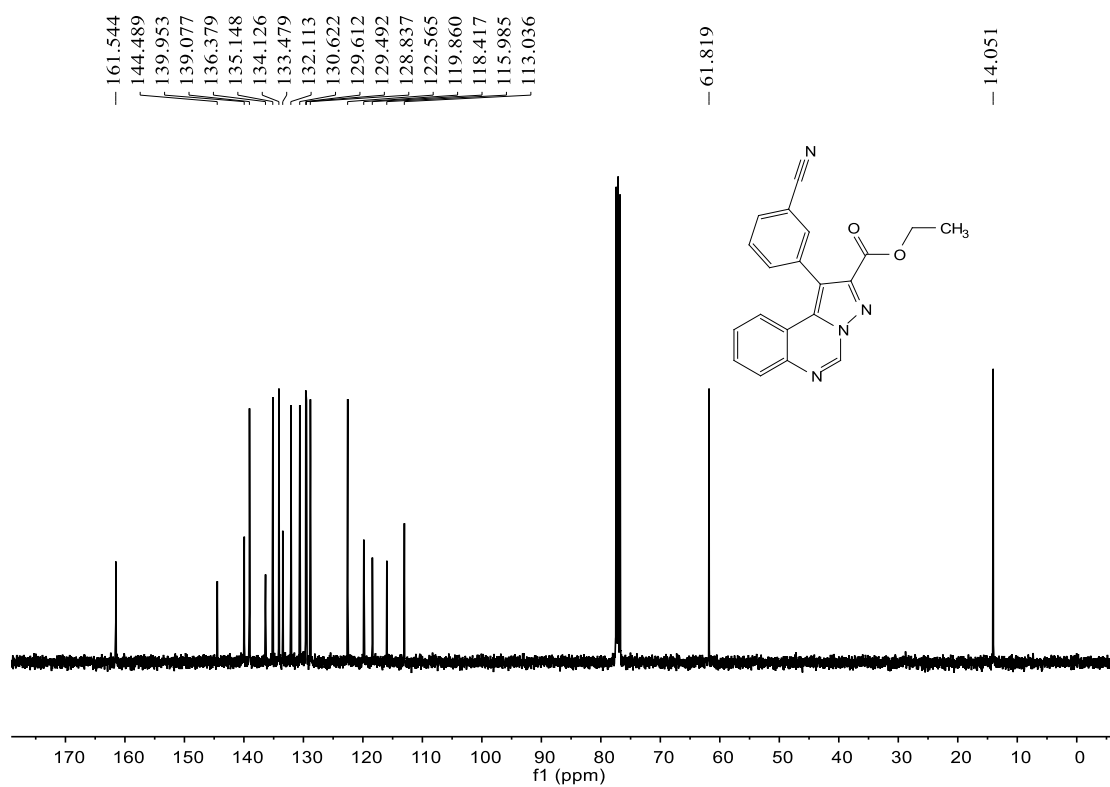

$^1\text{H}$  NMR and  $^{13}\text{C}$  NMR spectra of compound **3ma**

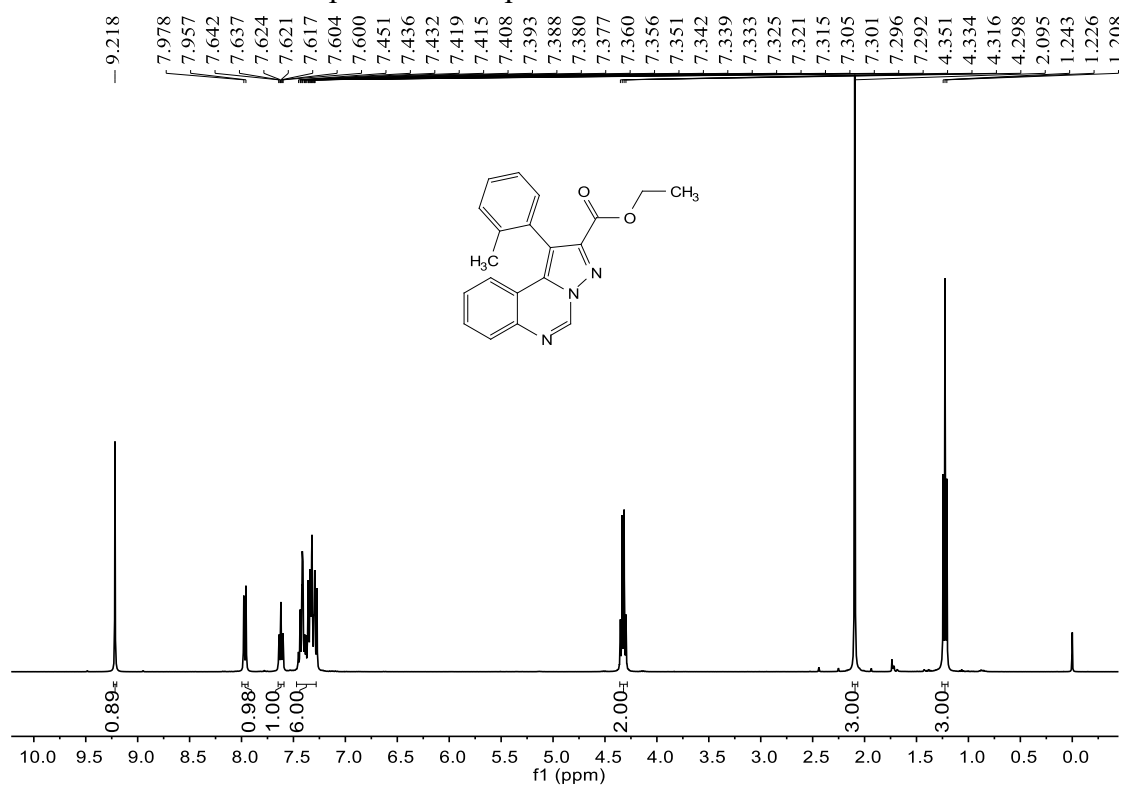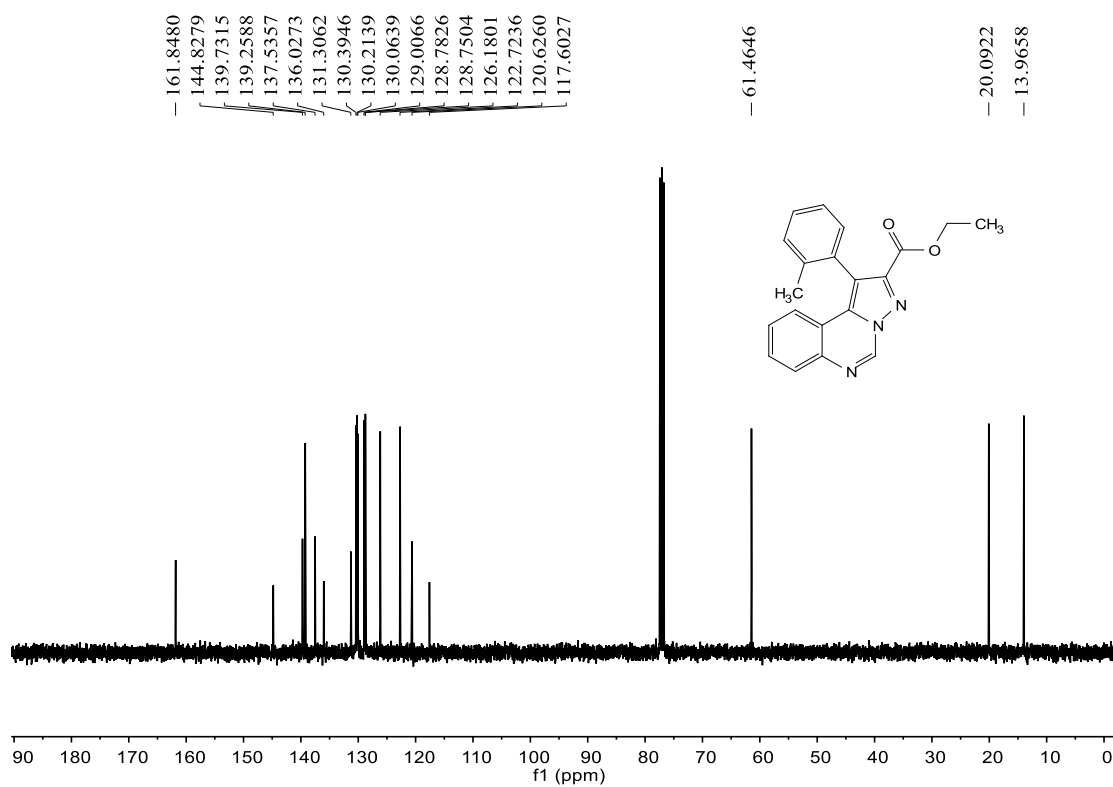

$^1\text{H}$  NMR and  $^{13}\text{C}$  NMR spectra of compound **3na**

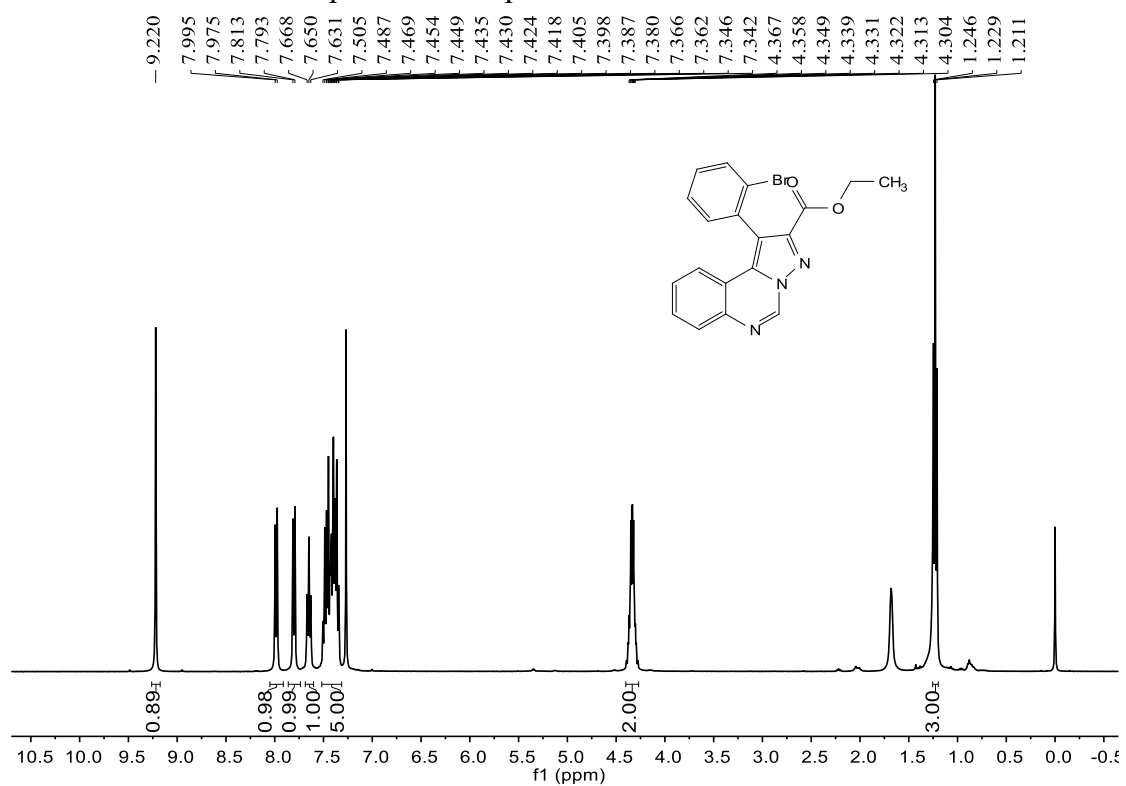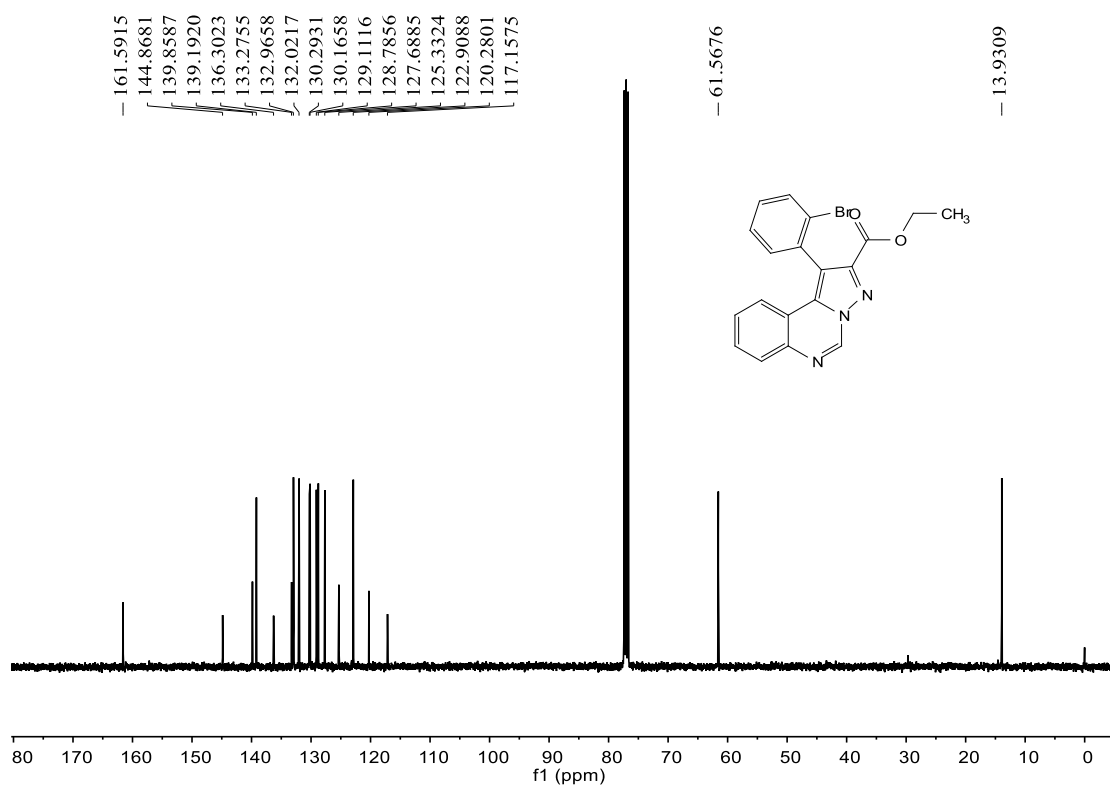

$^1\text{H}$  NMR and  $^{13}\text{C}$  NMR spectra of compound **30a**

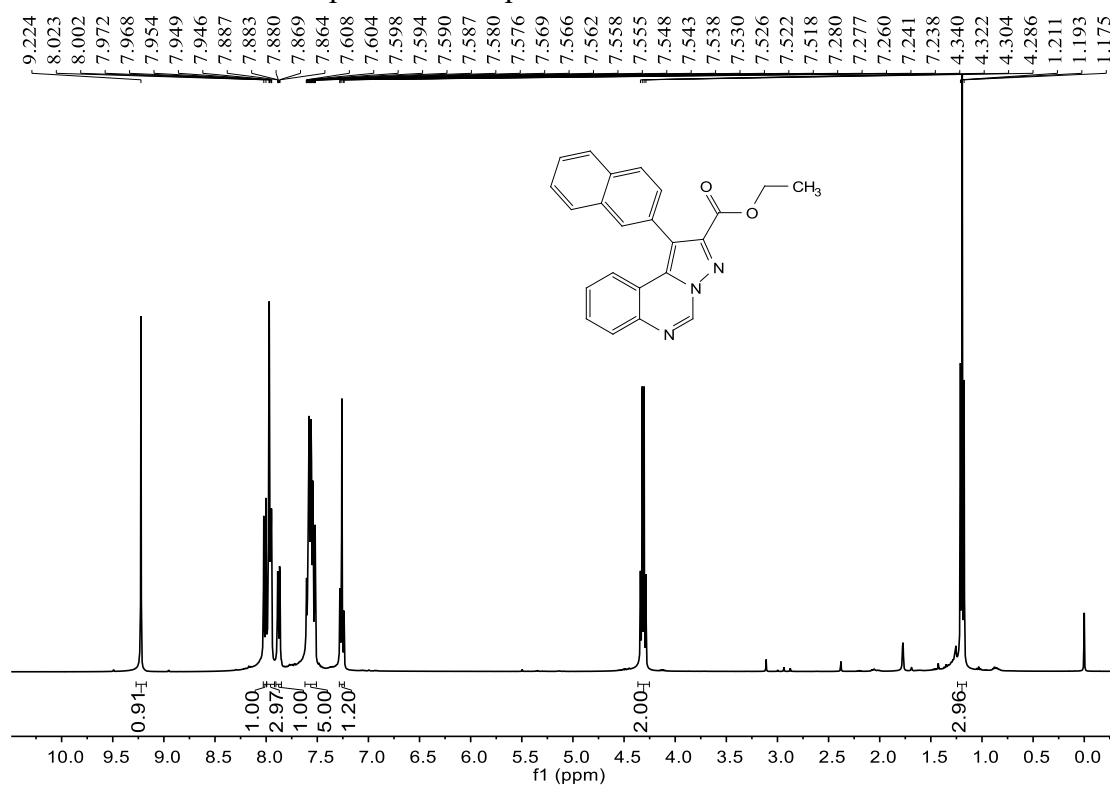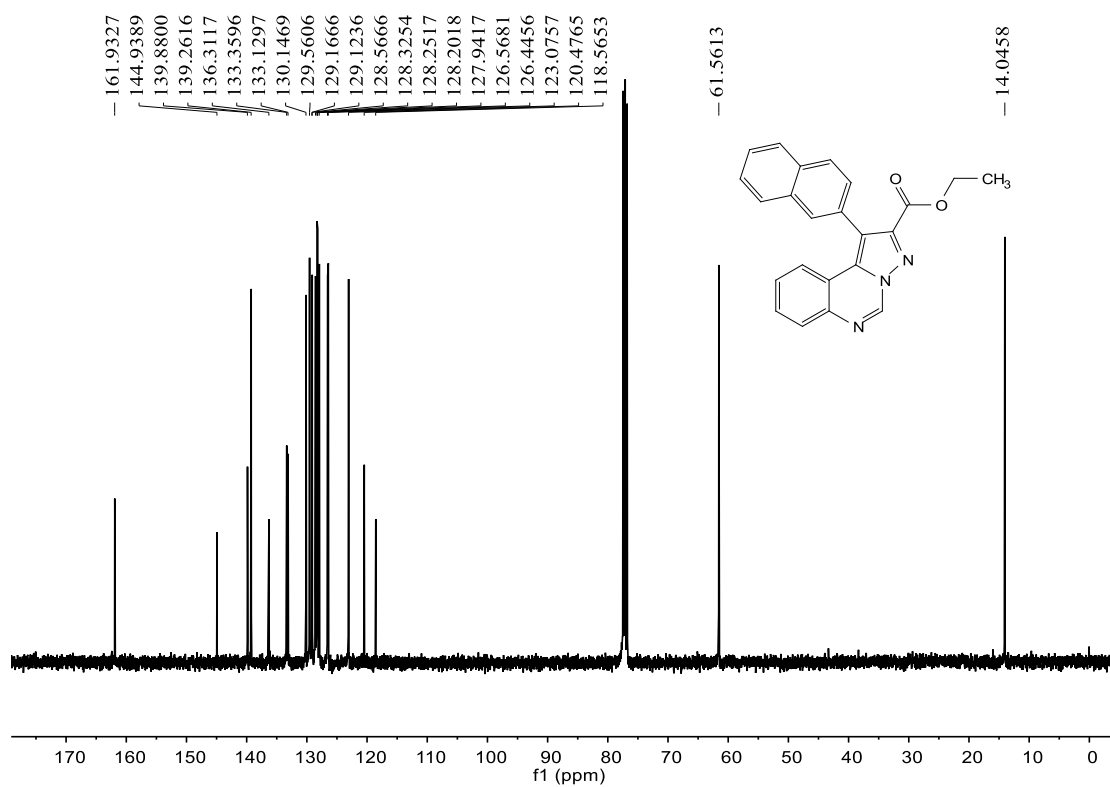

$^1\text{H}$  NMR and  $^{13}\text{C}$  NMR spectra of compound **3pa**

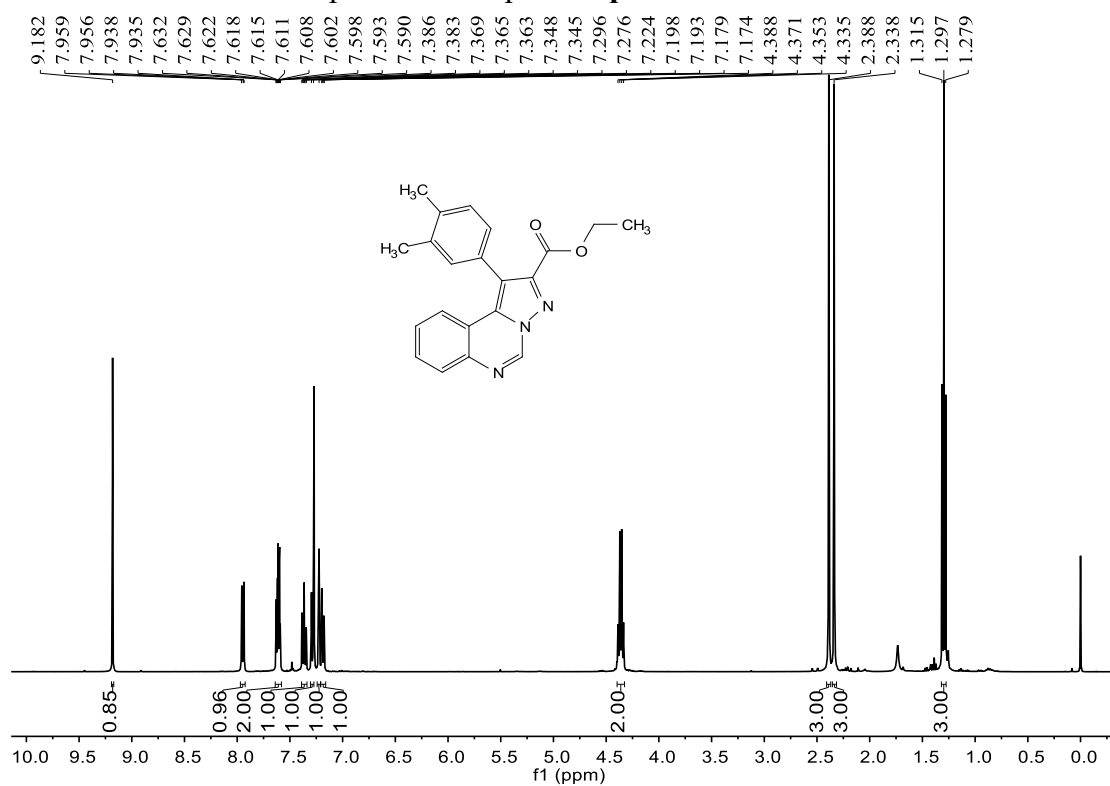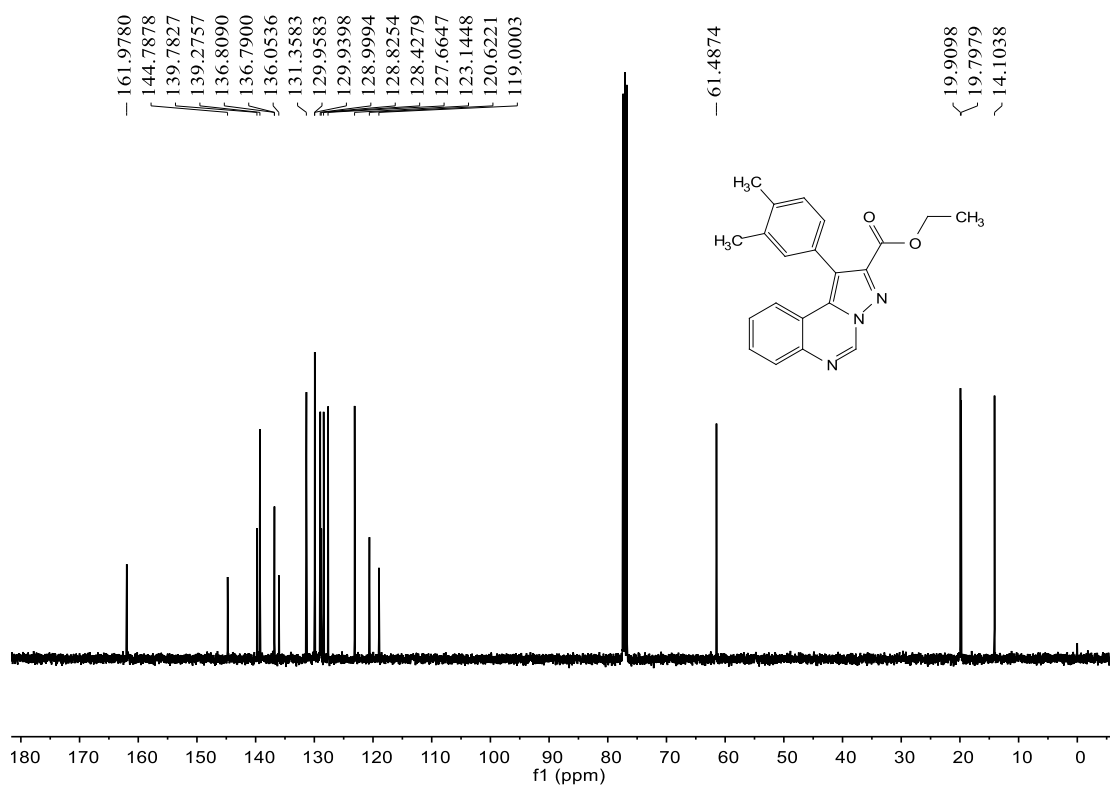

$^1\text{H}$  NMR and  $^{13}\text{C}$  NMR spectra of compound **3qa**

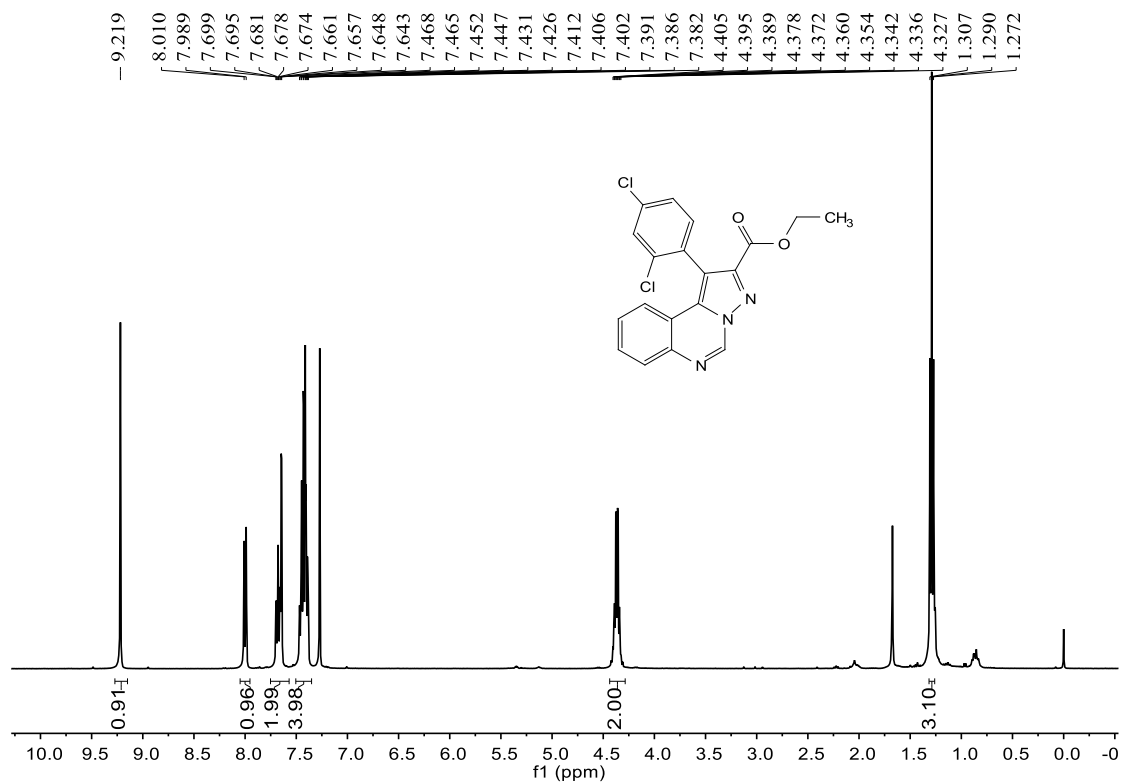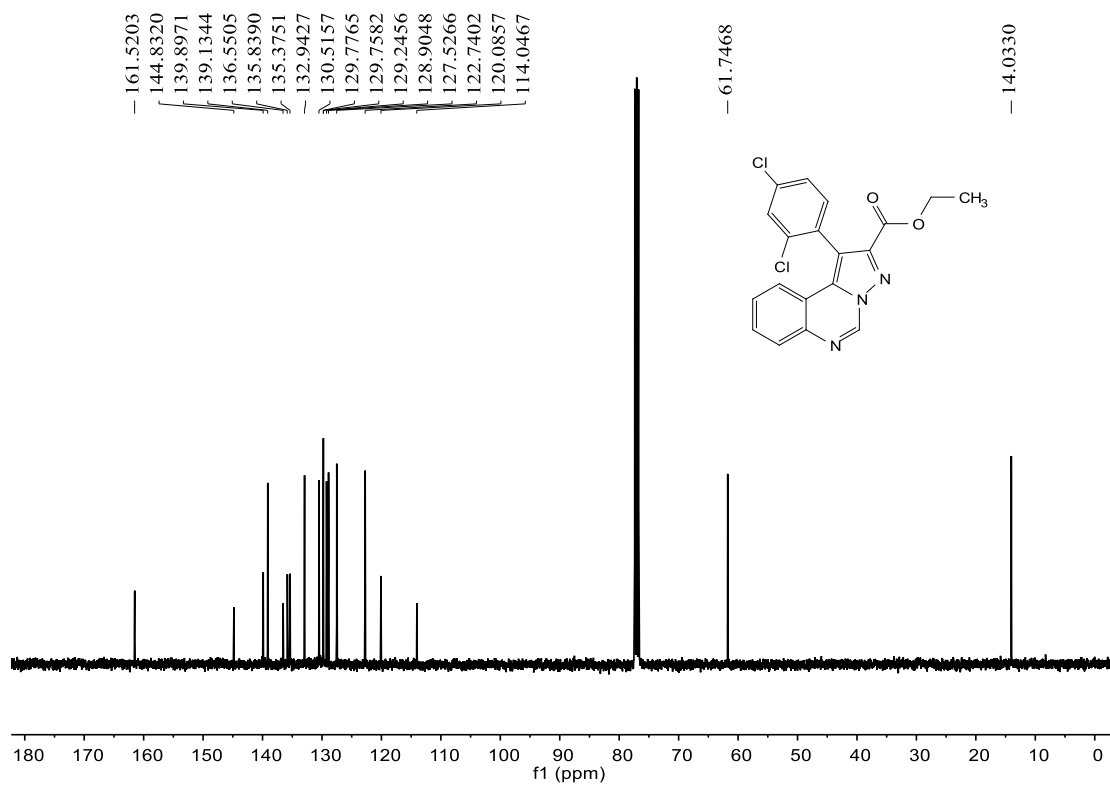

$^1\text{H}$  NMR and  $^{13}\text{C}$  NMR spectra of compound **3ra**

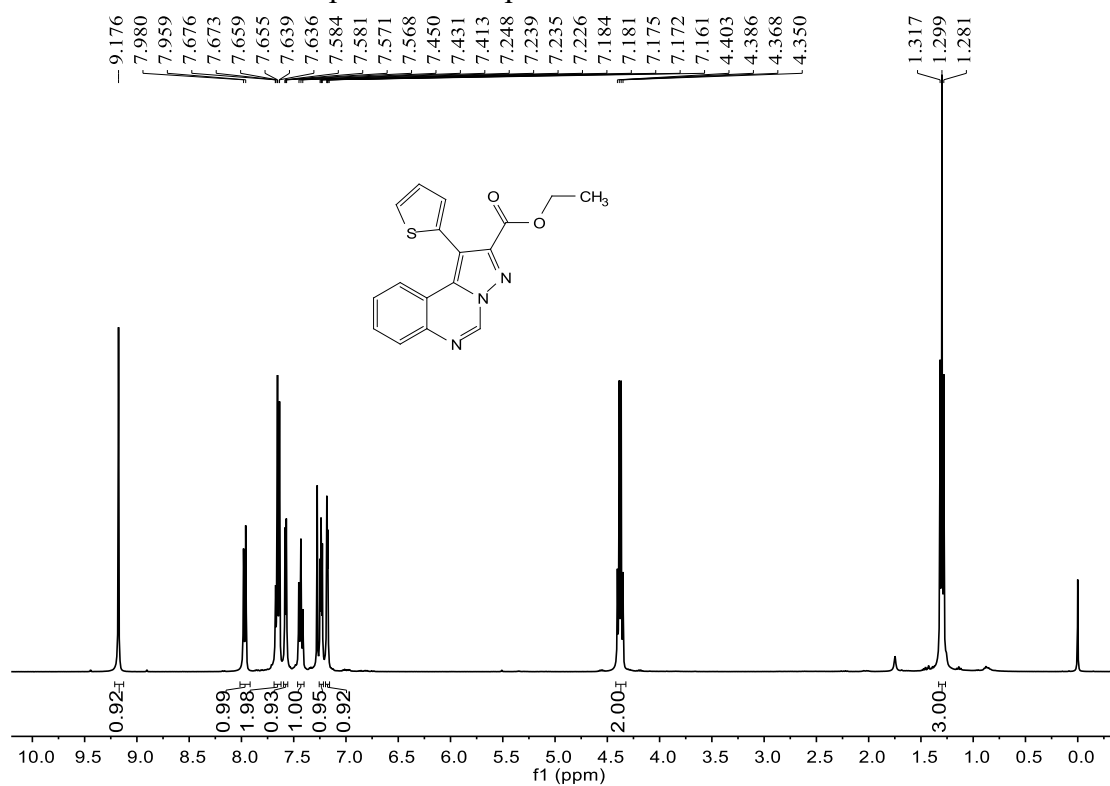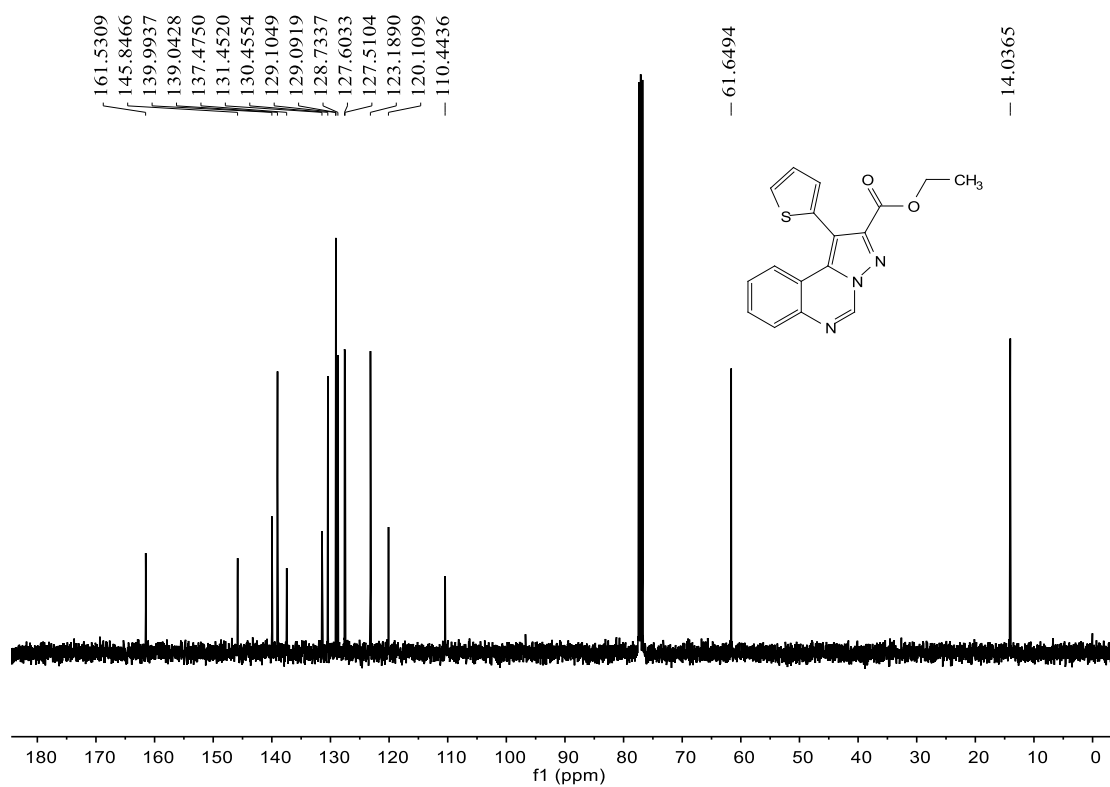

<sup>1</sup>H NMR and <sup>13</sup>C NMR spectra of compound **3sa**

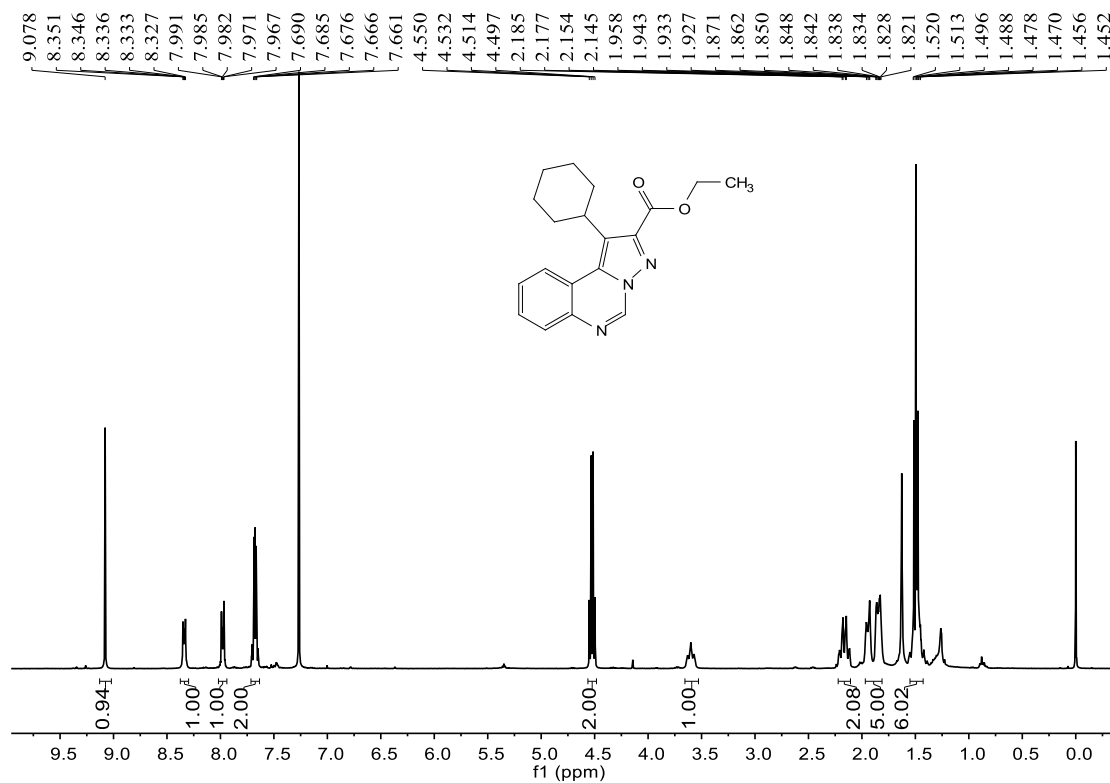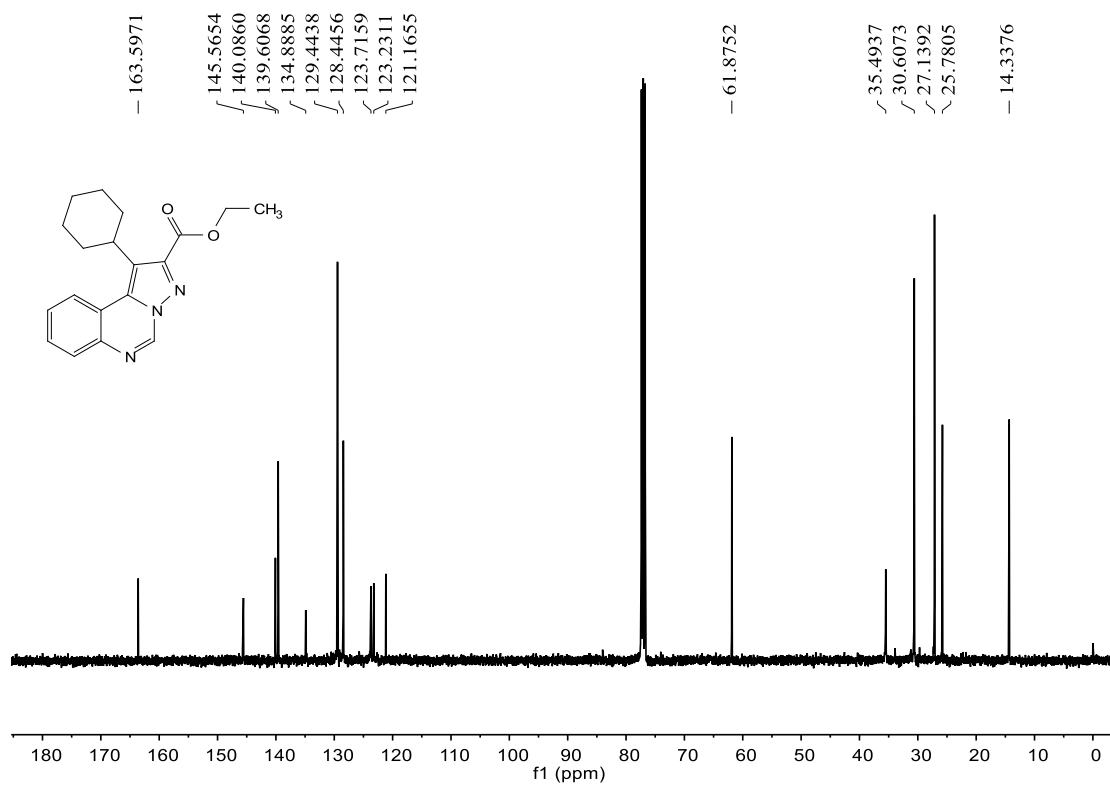



$^1\text{H}$  NMR and  $^{13}\text{C}$  NMR spectra of compound **3ta**

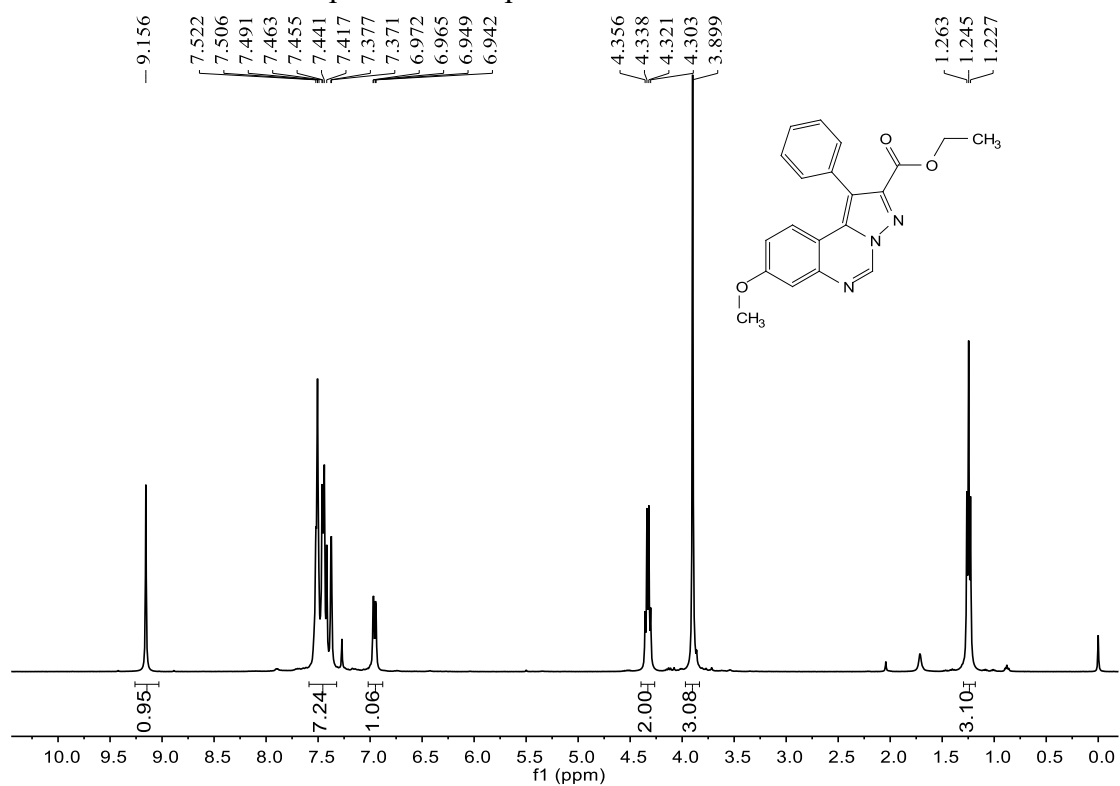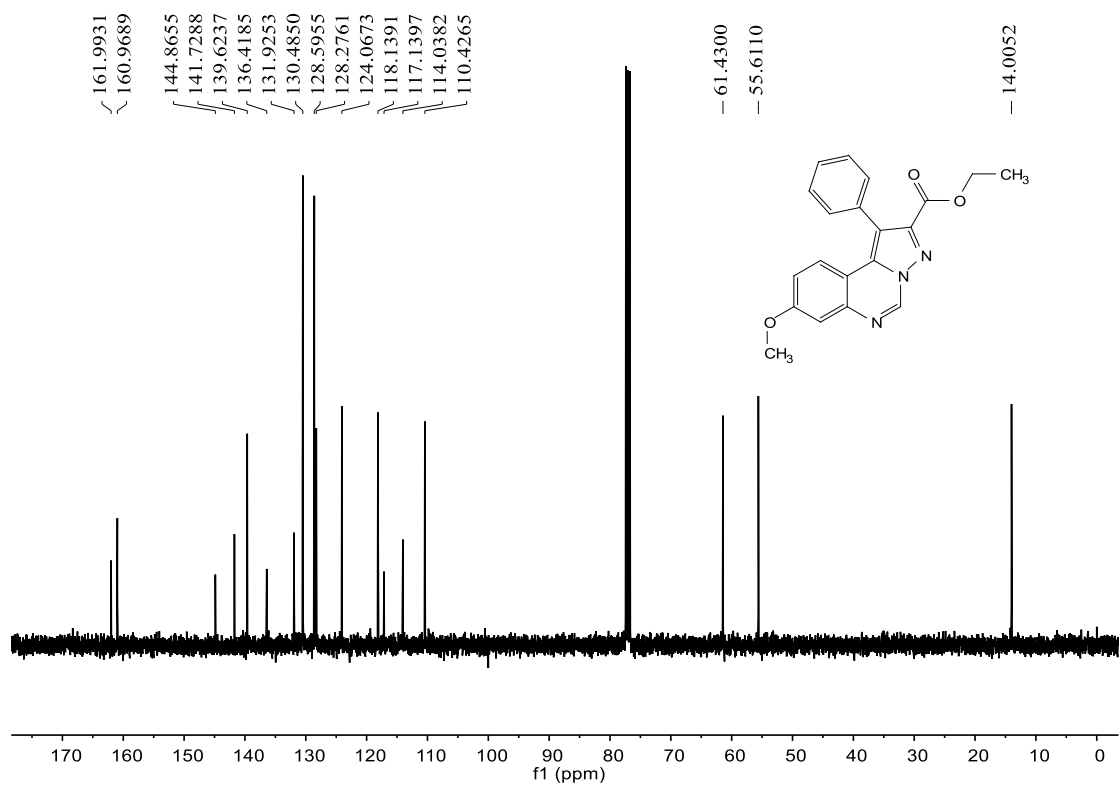

$^1\text{H}$  NMR and  $^{13}\text{C}$  NMR spectra of compound **3ua**

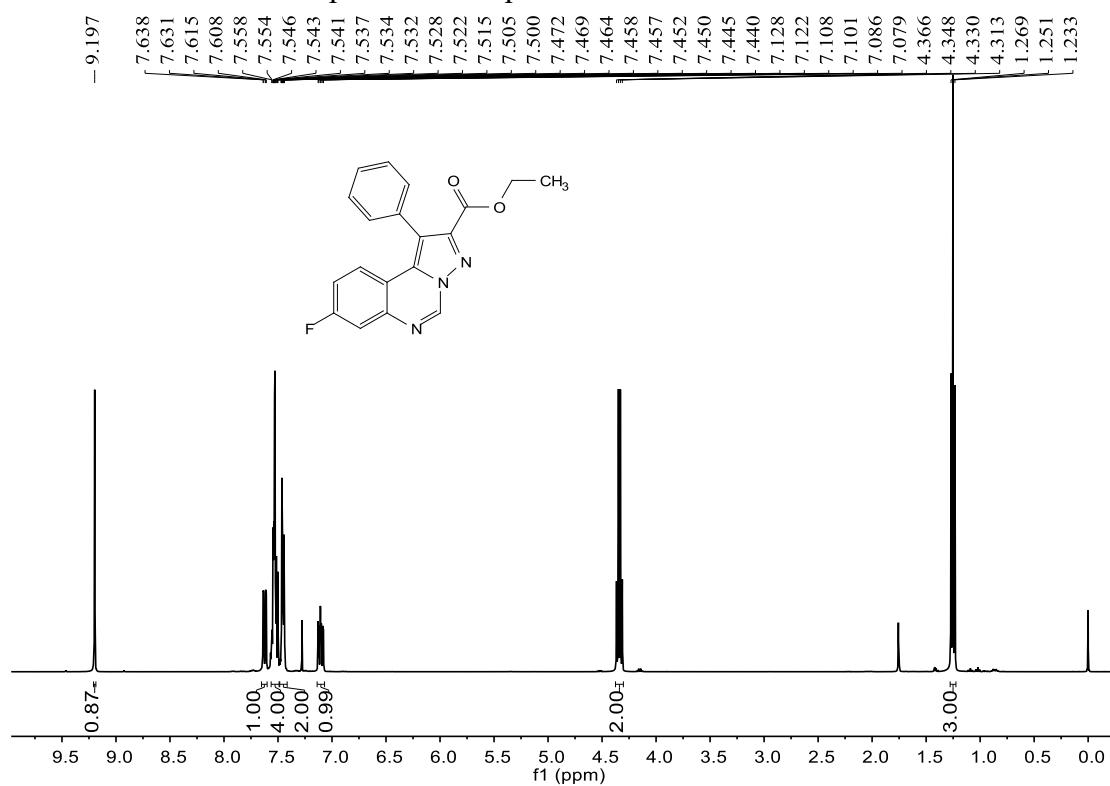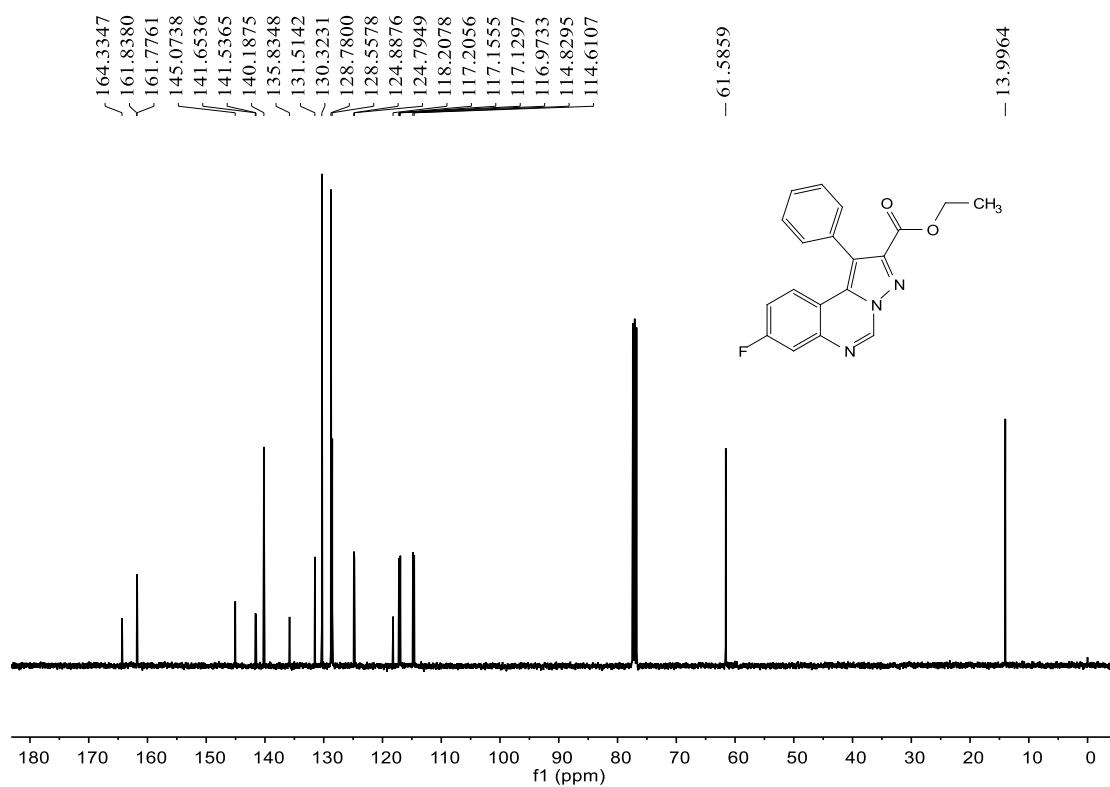

$^1\text{H}$  NMR and  $^{13}\text{C}$  NMR spectra of compound **3va**

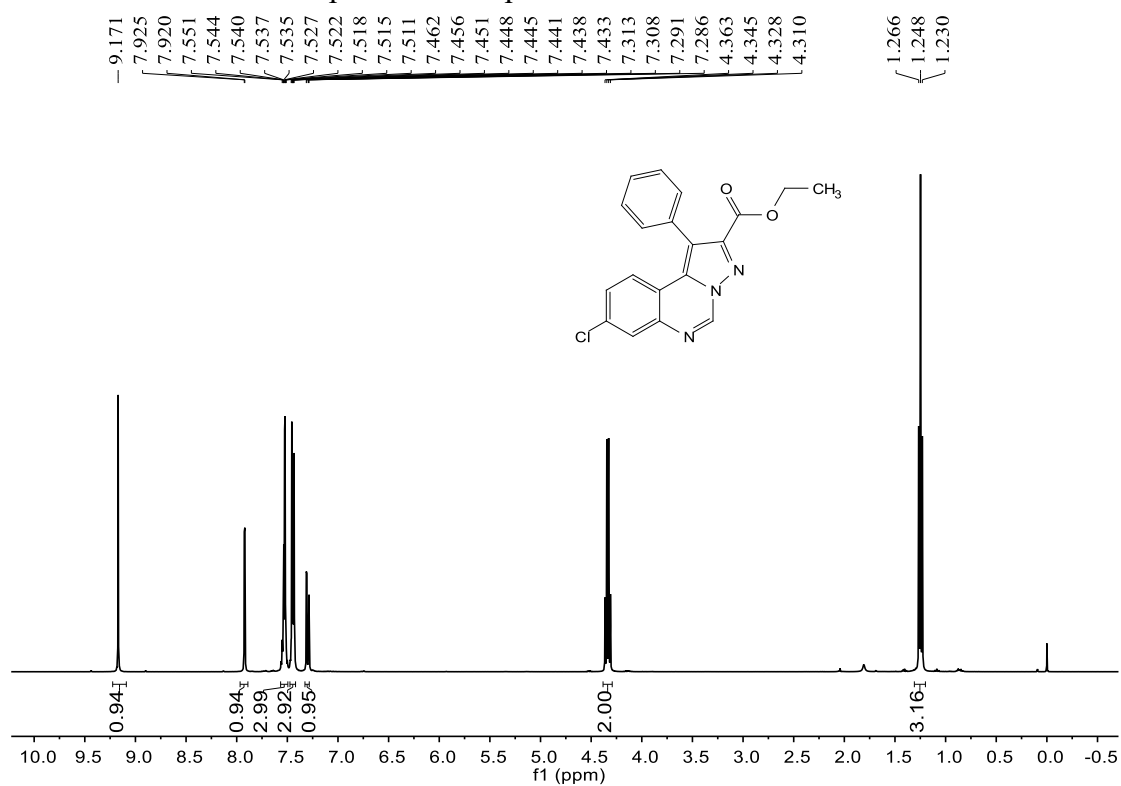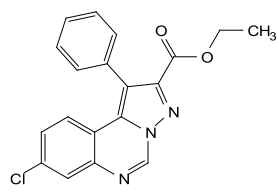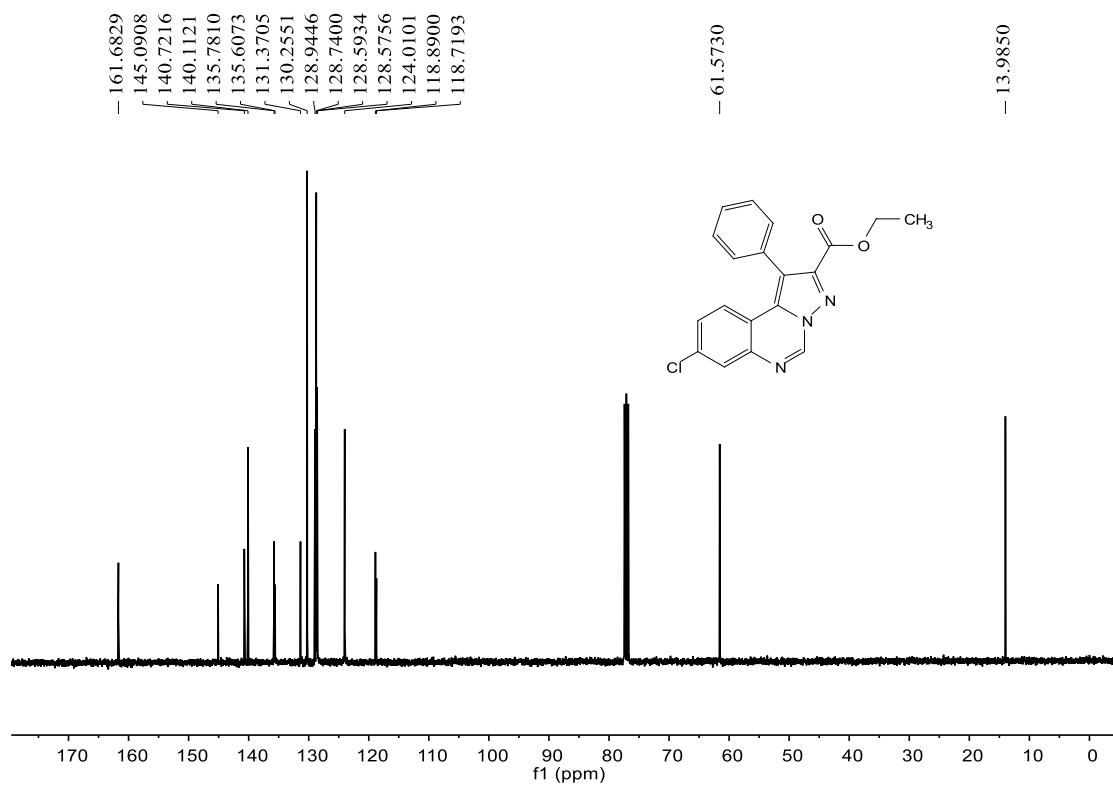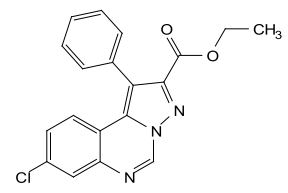

<sup>1</sup>H NMR and <sup>13</sup>C NMR spectra of compound **3wa**

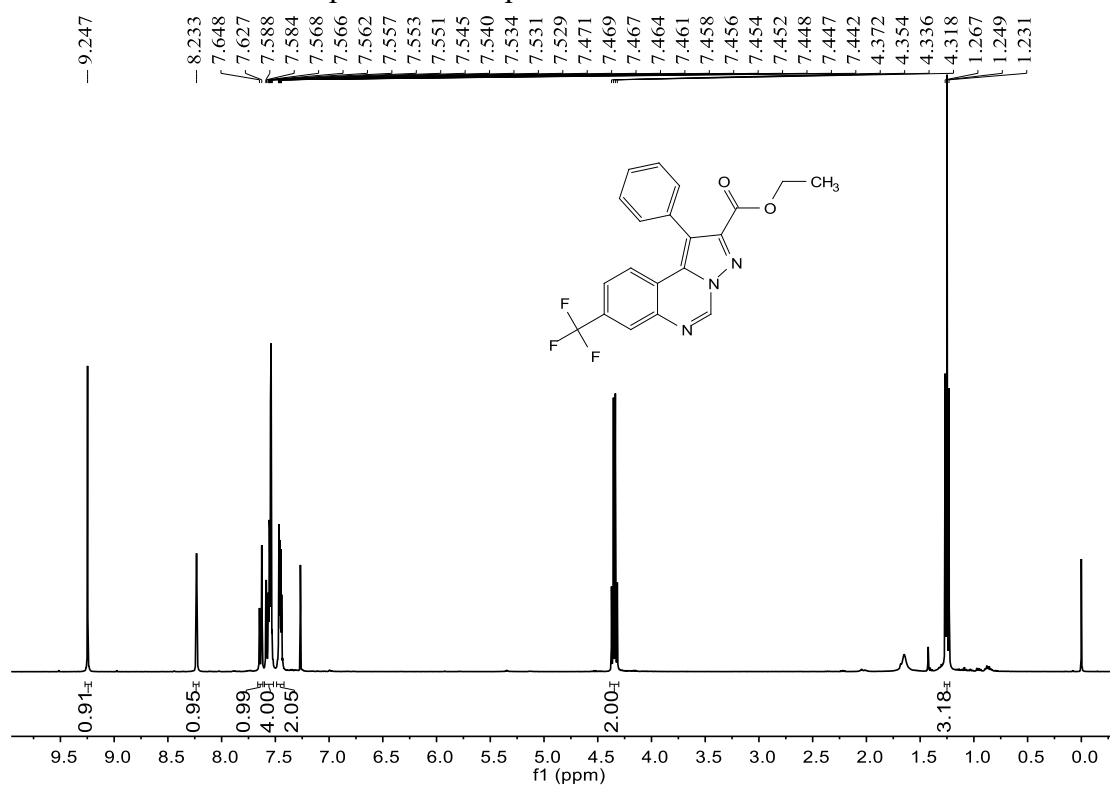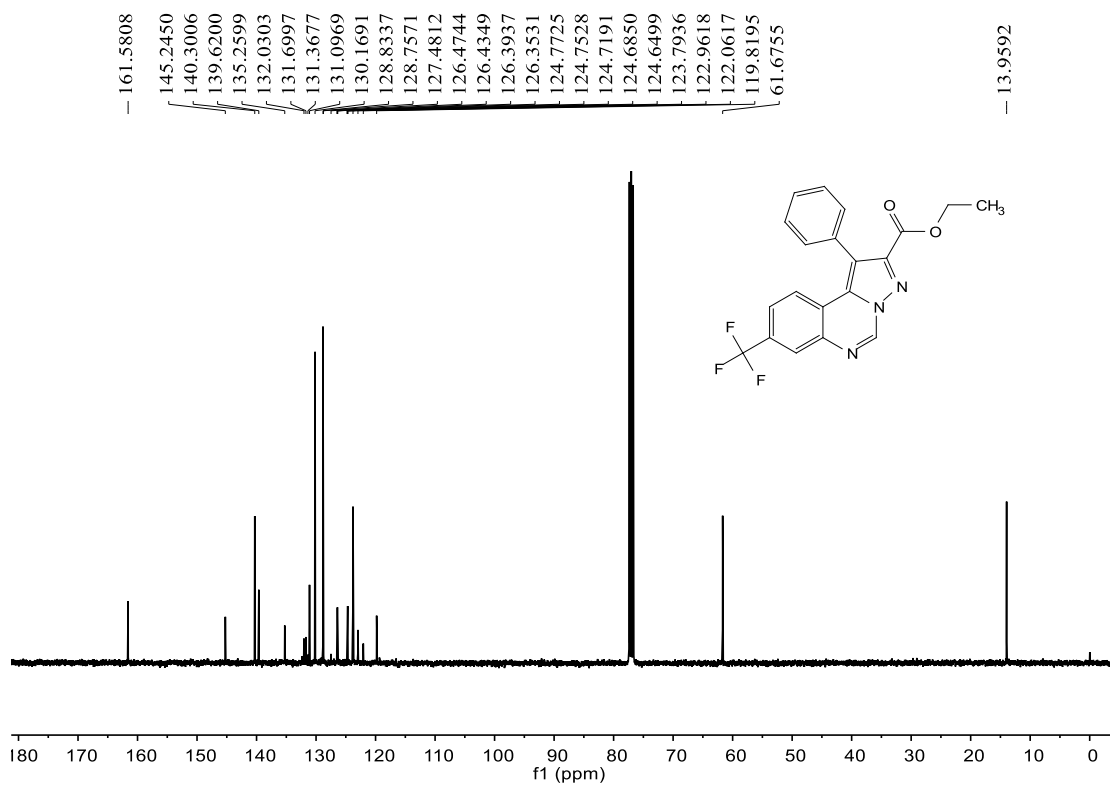

<sup>1</sup>H NMR and <sup>13</sup>C NMR spectra of compound **3xa**

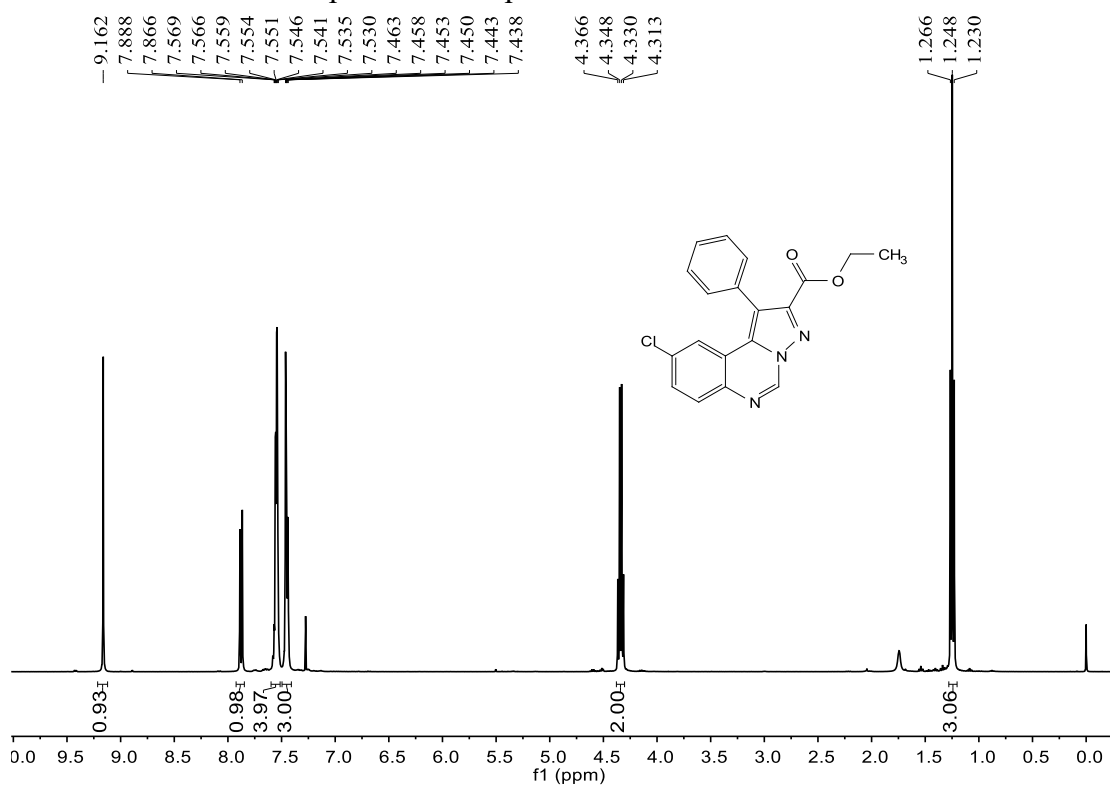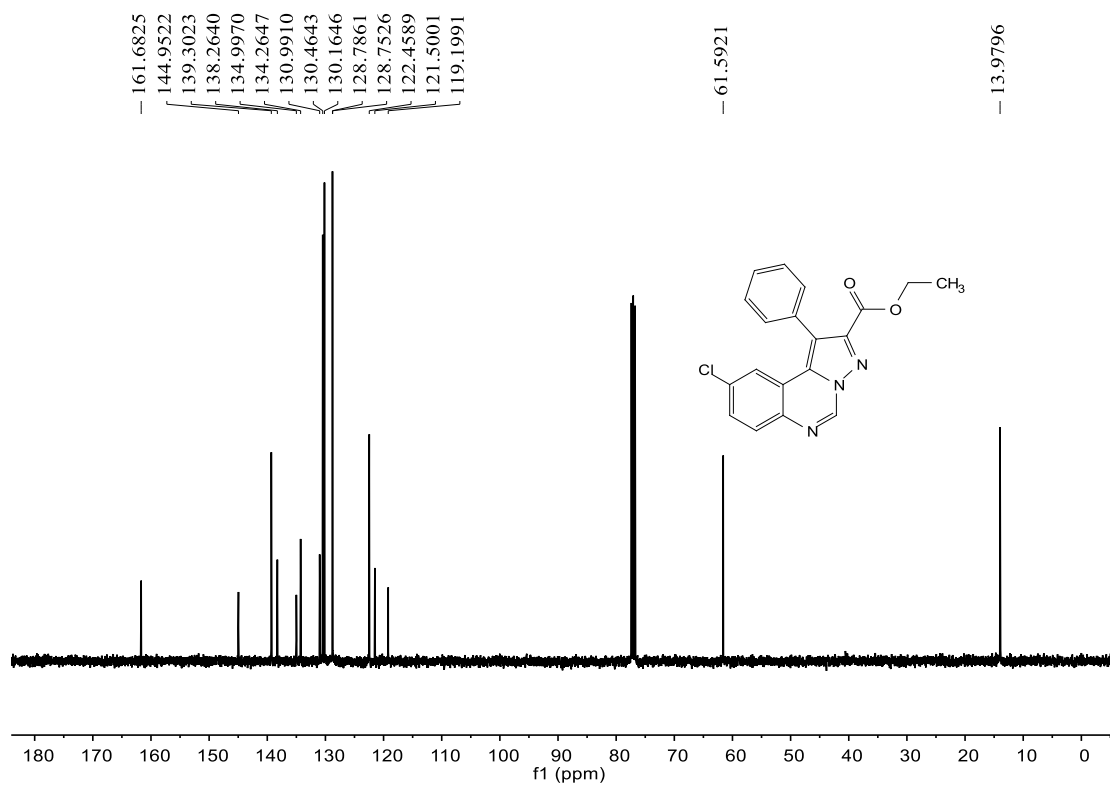

# <sup>1</sup>H NMR and <sup>13</sup>C NMR spectra of compound 3ya

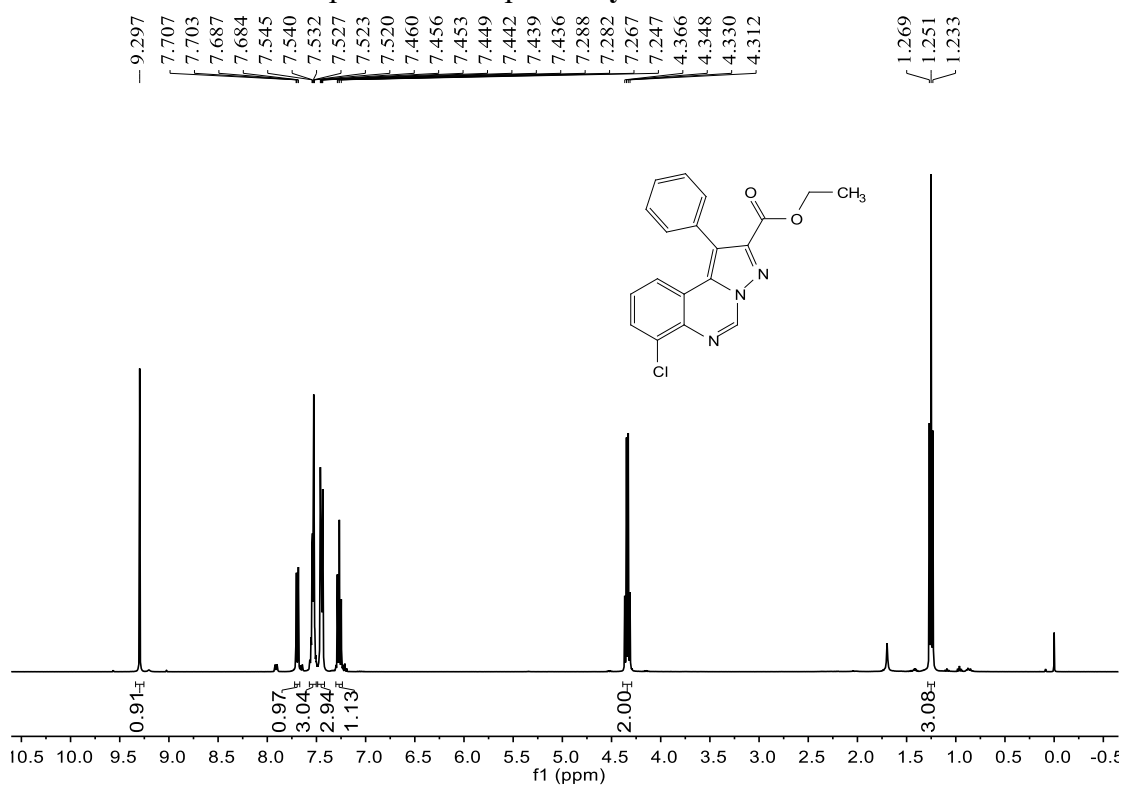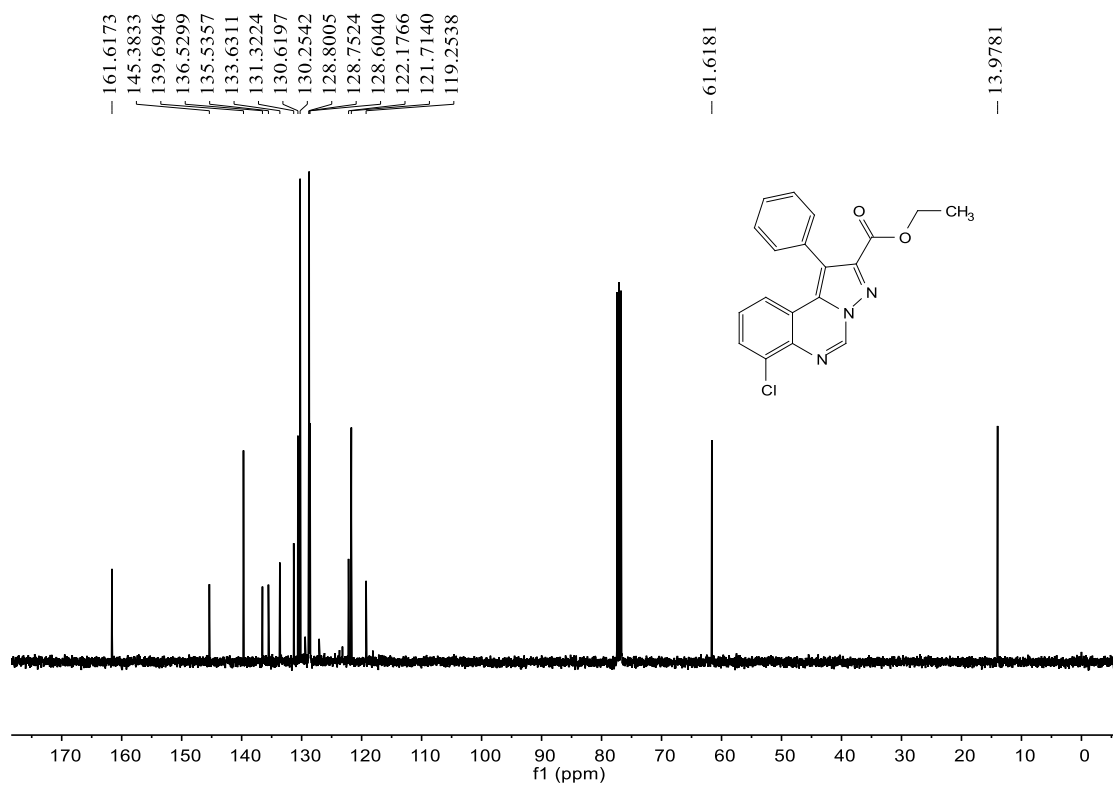

$^1\text{H}$  NMR and  $^{13}\text{C}$  NMR spectra of compound **3za**

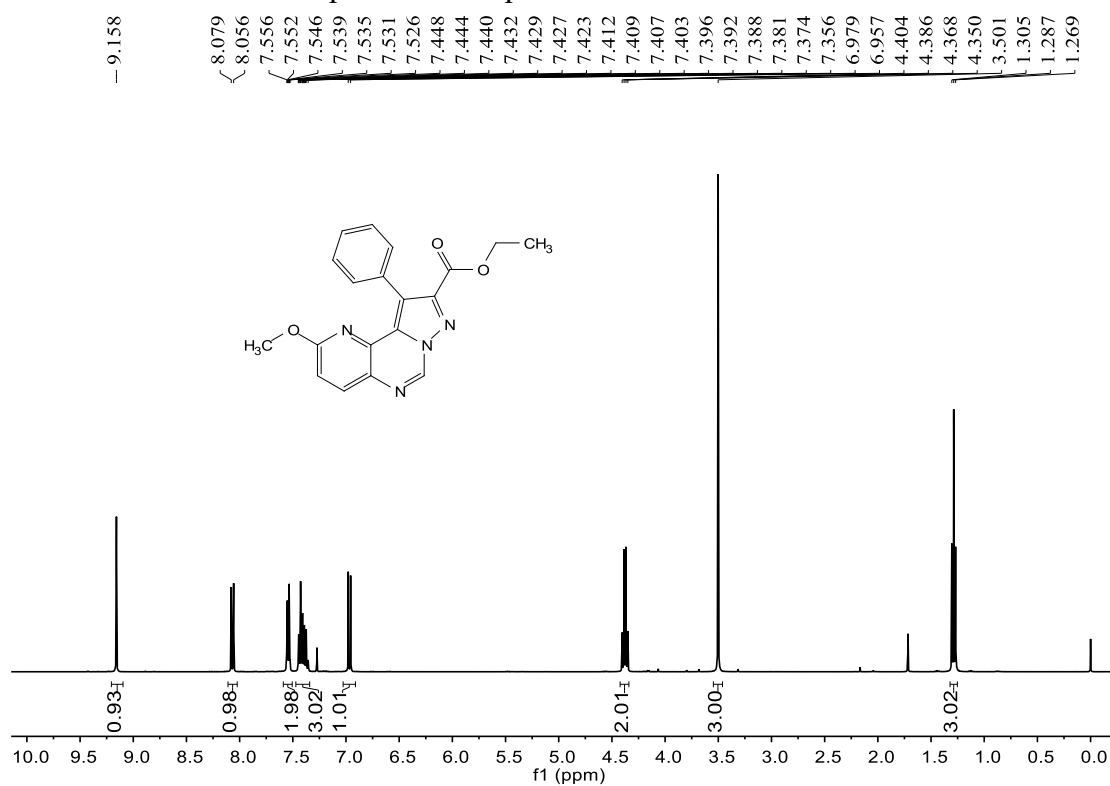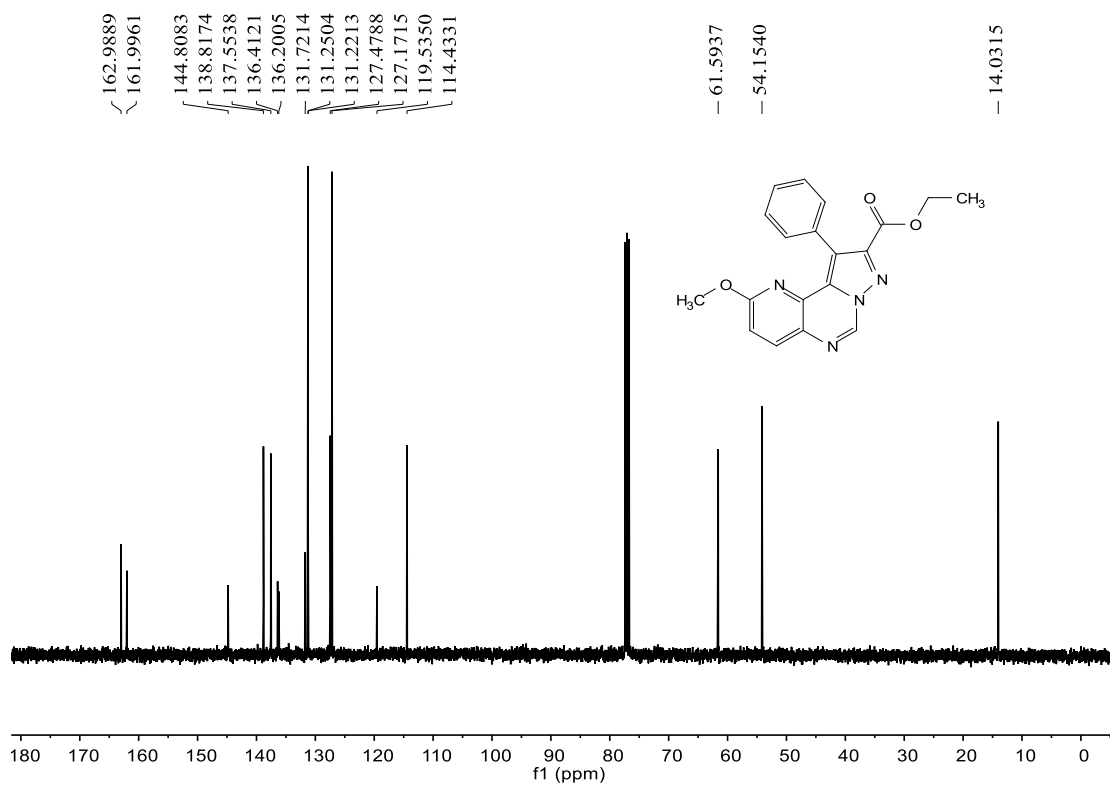

# <sup>1</sup>H NMR and <sup>13</sup>C NMR spectra of compound **3ab**

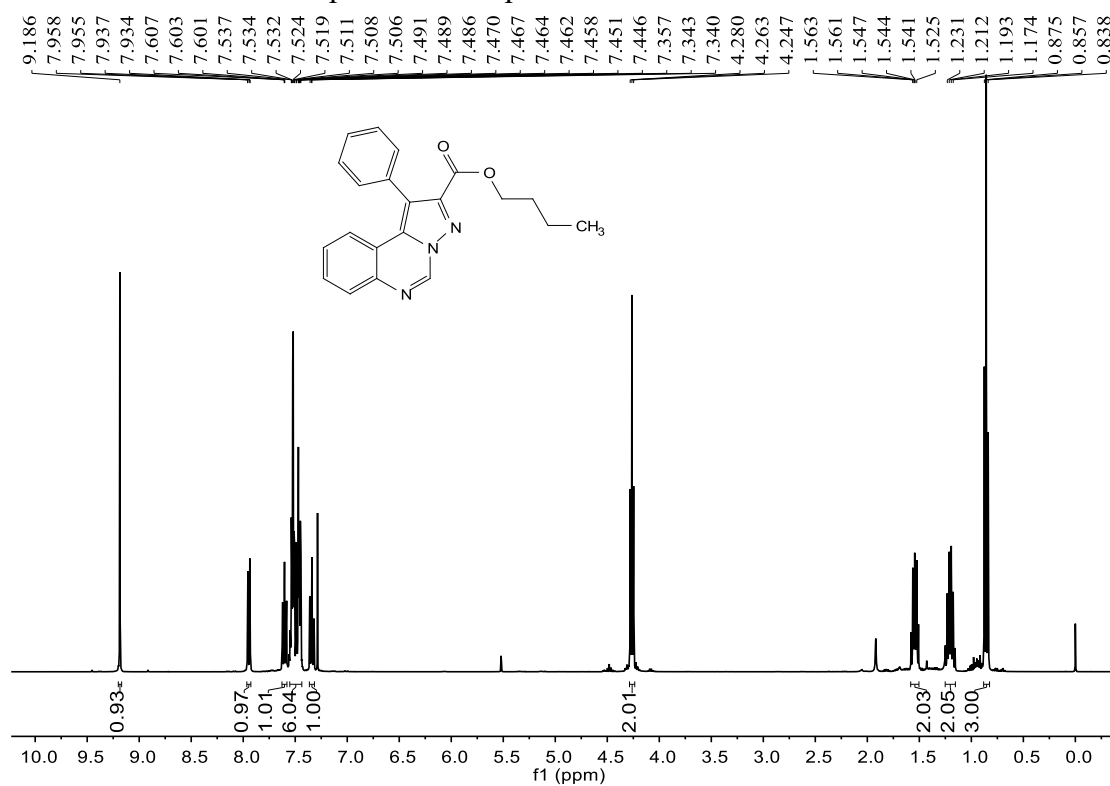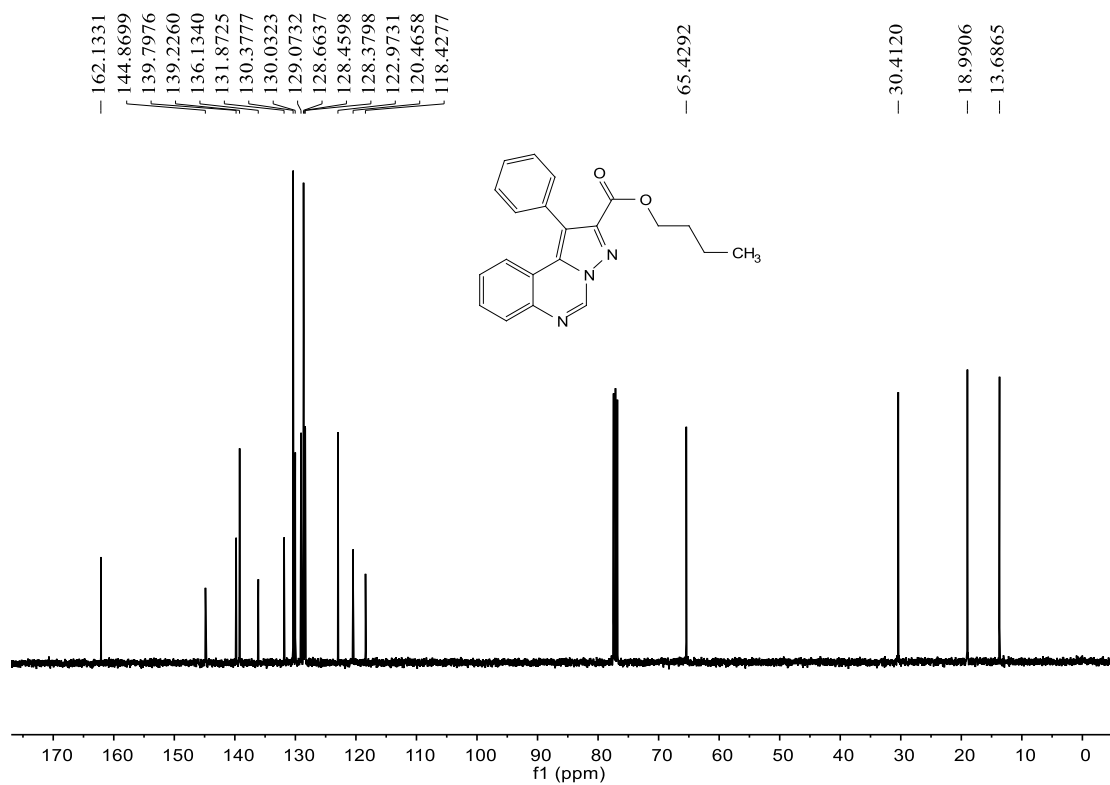



<sup>1</sup>H NMR and <sup>13</sup>C NMR spectra of compound **3ac**

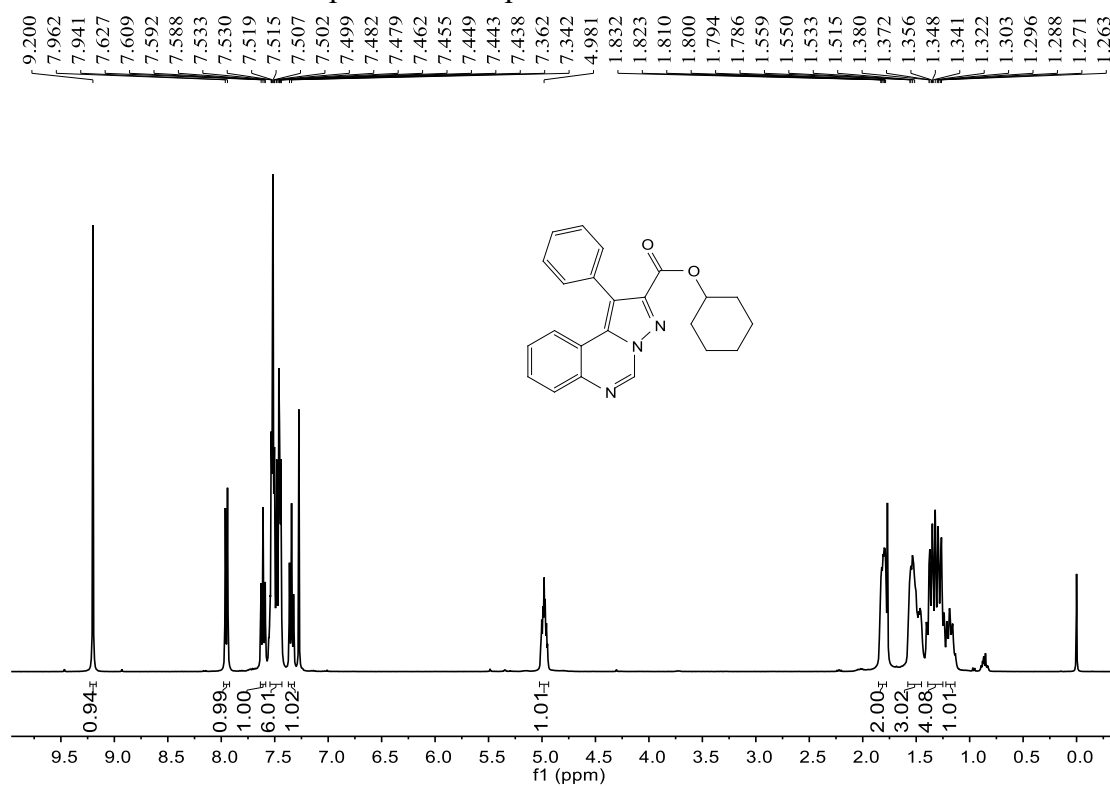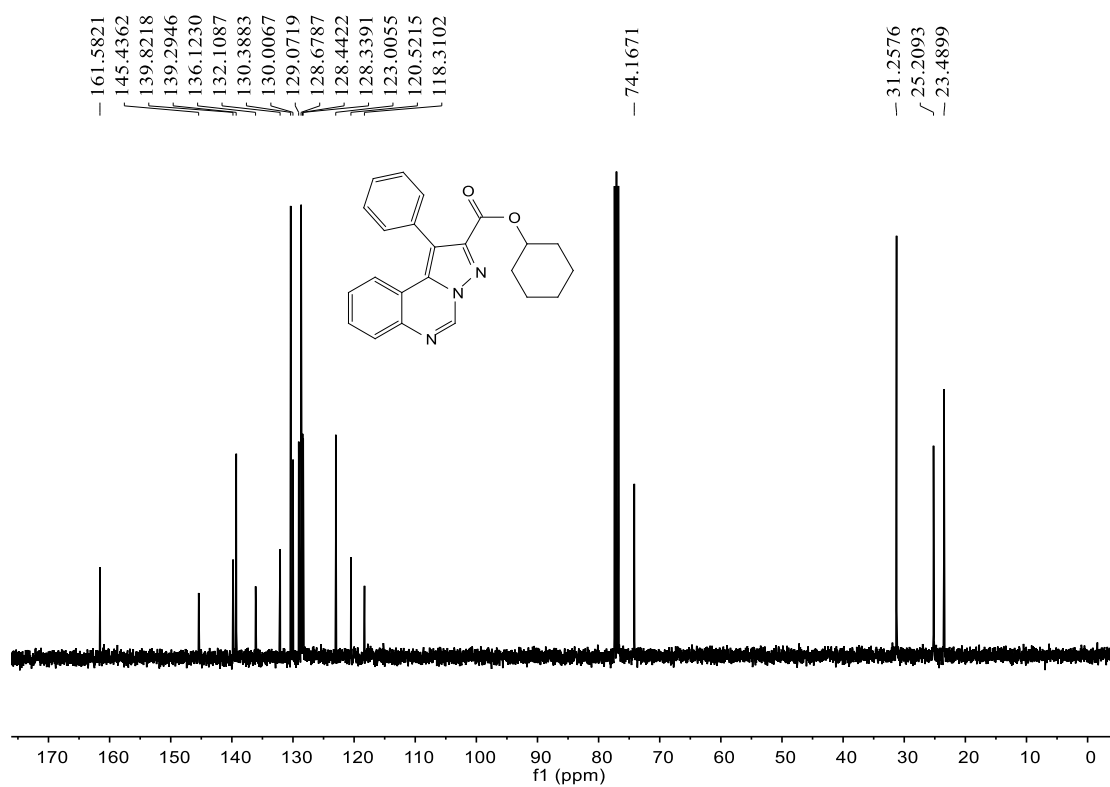

<sup>1</sup>H NMR and <sup>13</sup>C NMR spectra of compound **3ad**

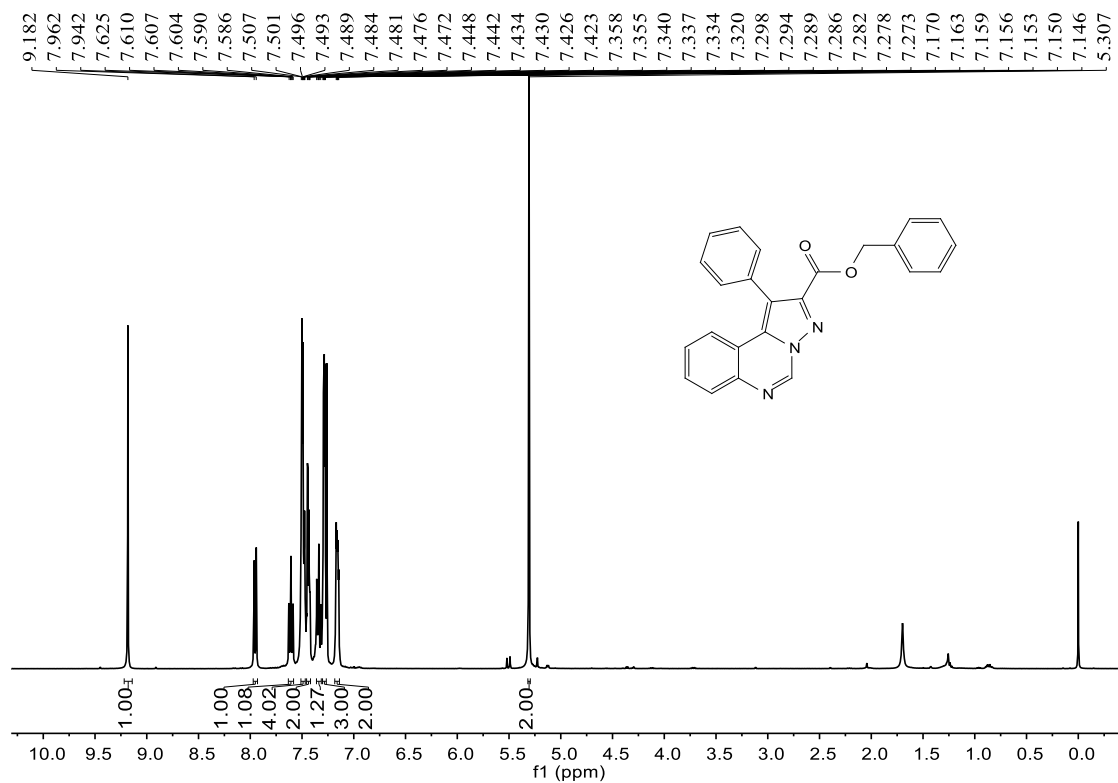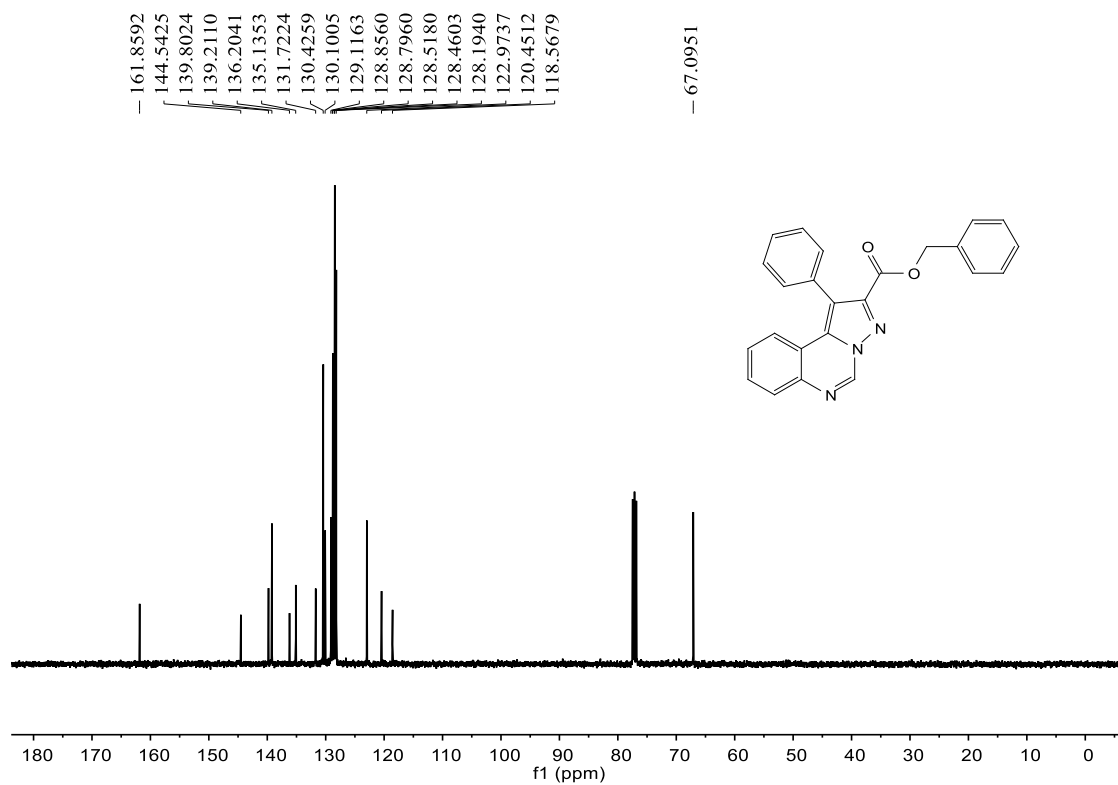

$^1\text{H}$  NMR and  $^{13}\text{C}$  NMR spectra of compound **3ae**

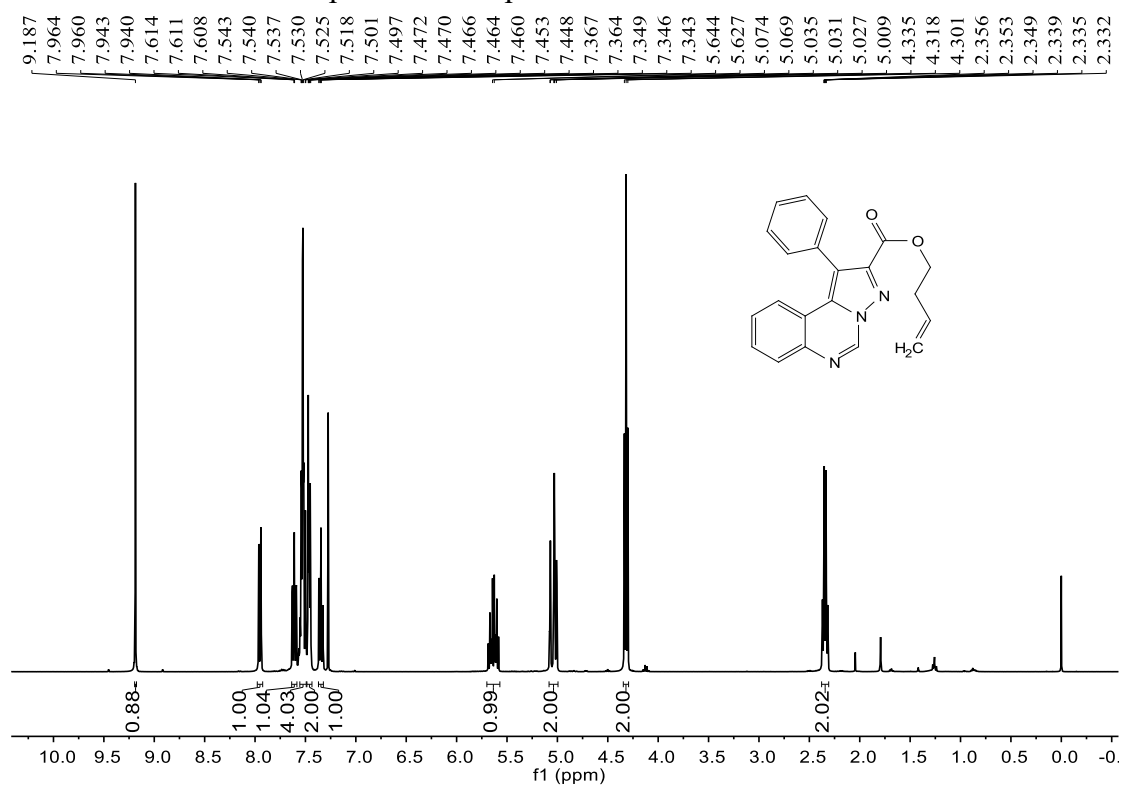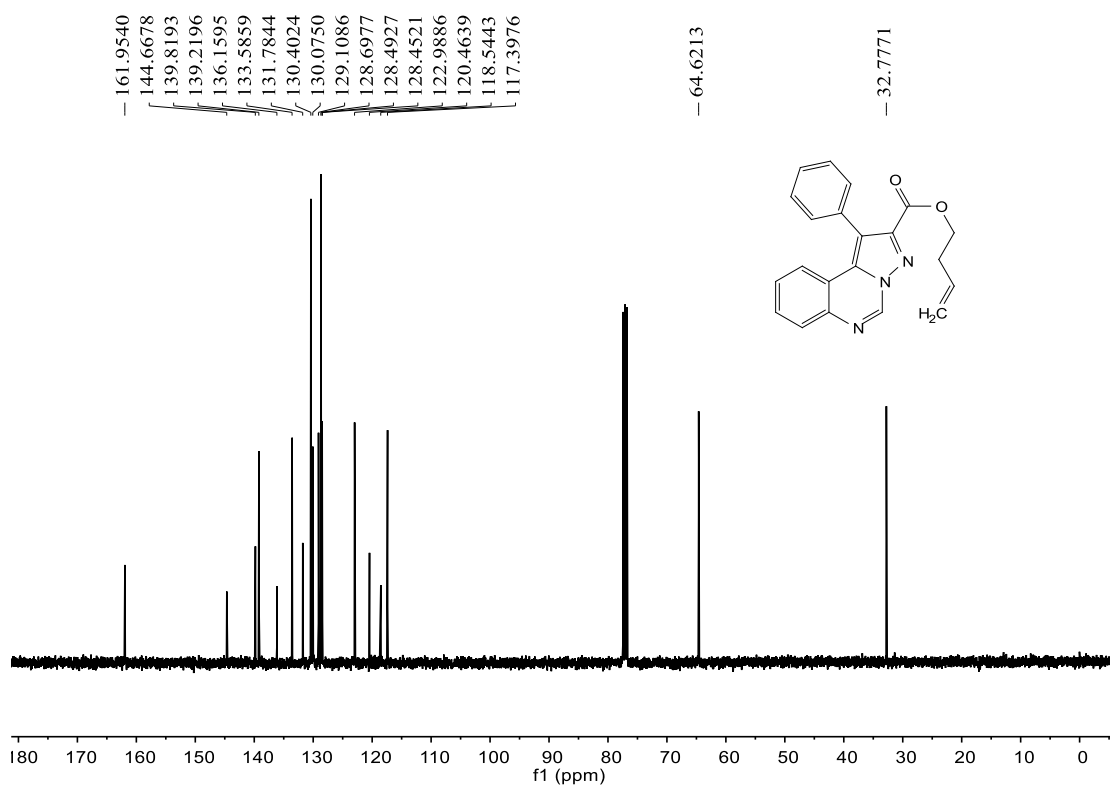

<sup>1</sup>H NMR and <sup>13</sup>C NMR spectra of compound **3af**

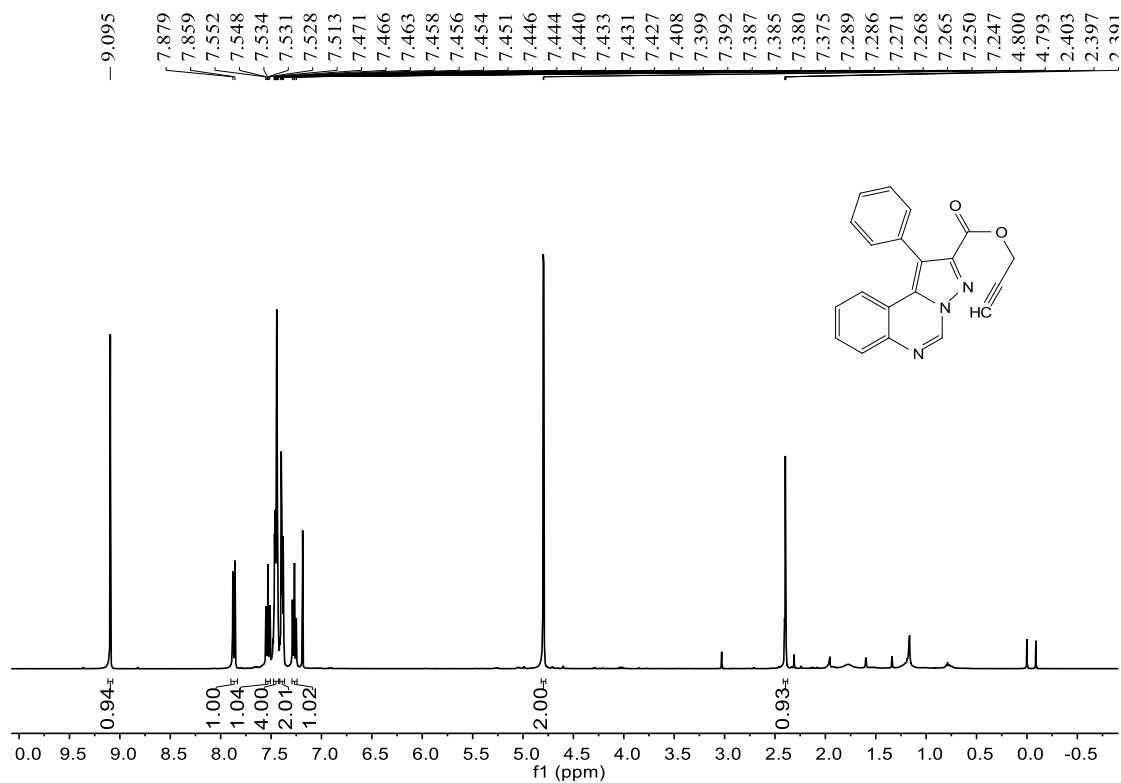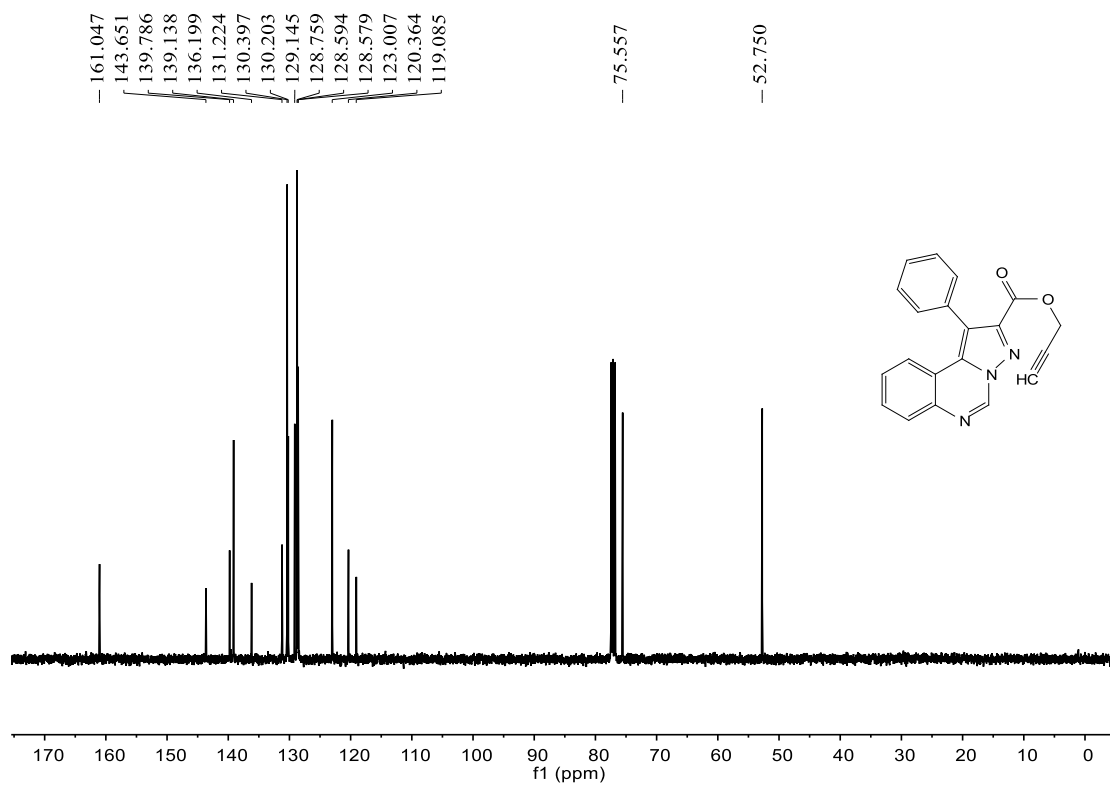

<sup>1</sup>H NMR and <sup>13</sup>C NMR spectra of compound **3ag**

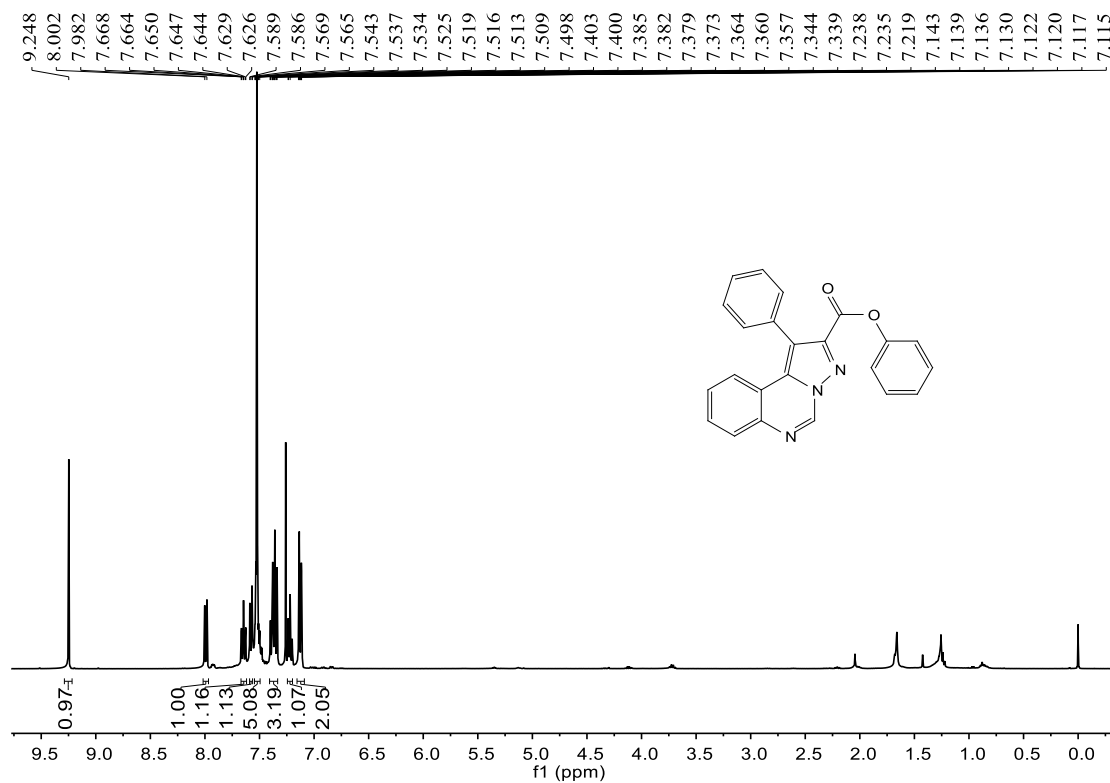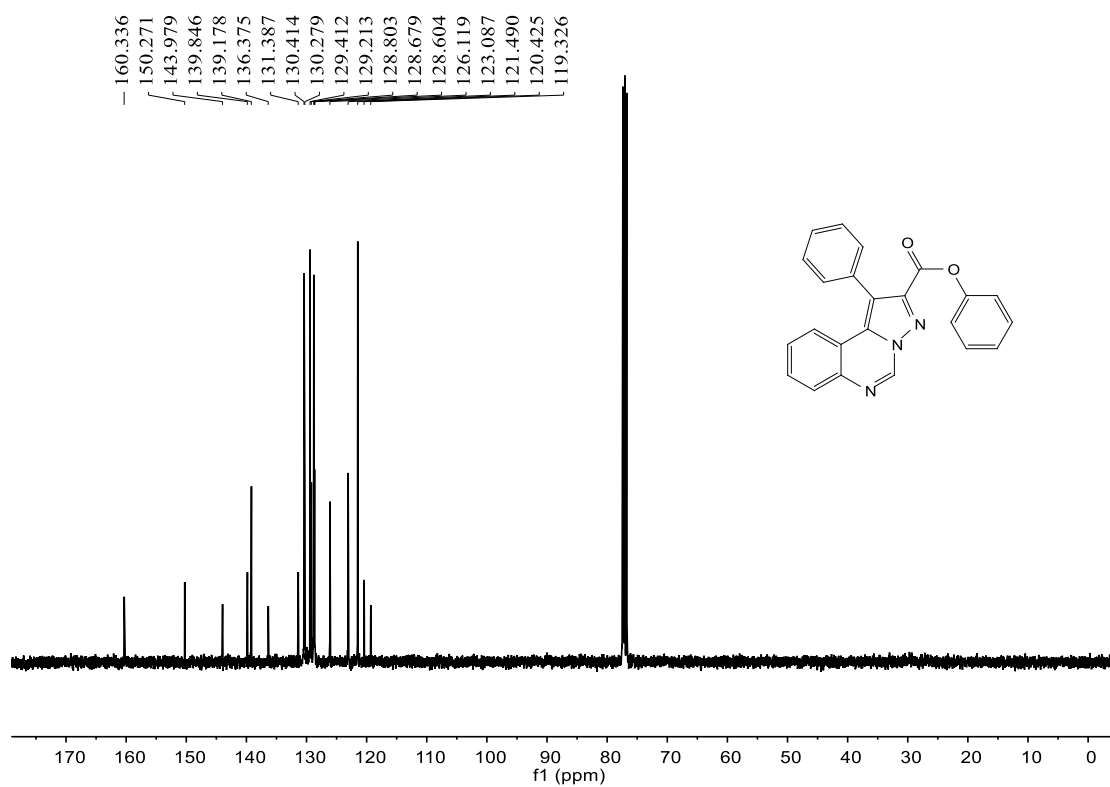

$^1\text{H}$  NMR and  $^{13}\text{C}$  NMR spectra of compound **3ah**

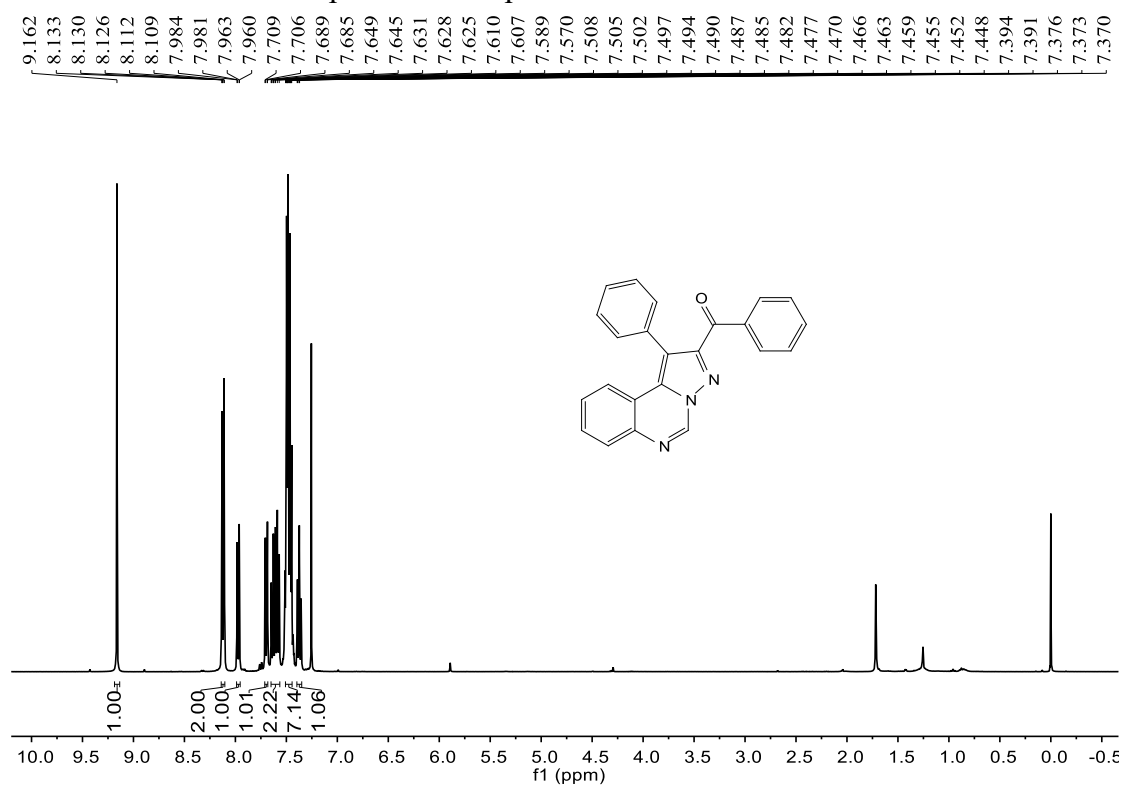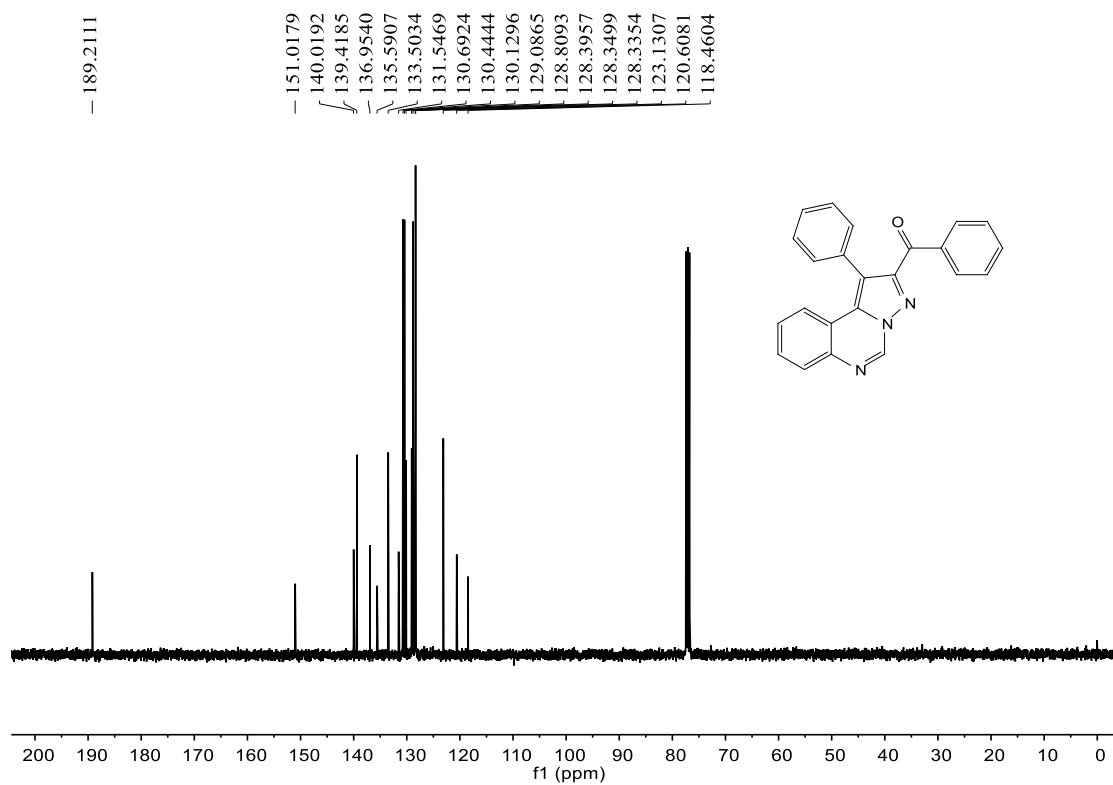

<sup>1</sup>H NMR and <sup>13</sup>C NMR spectra of compound **3ai**

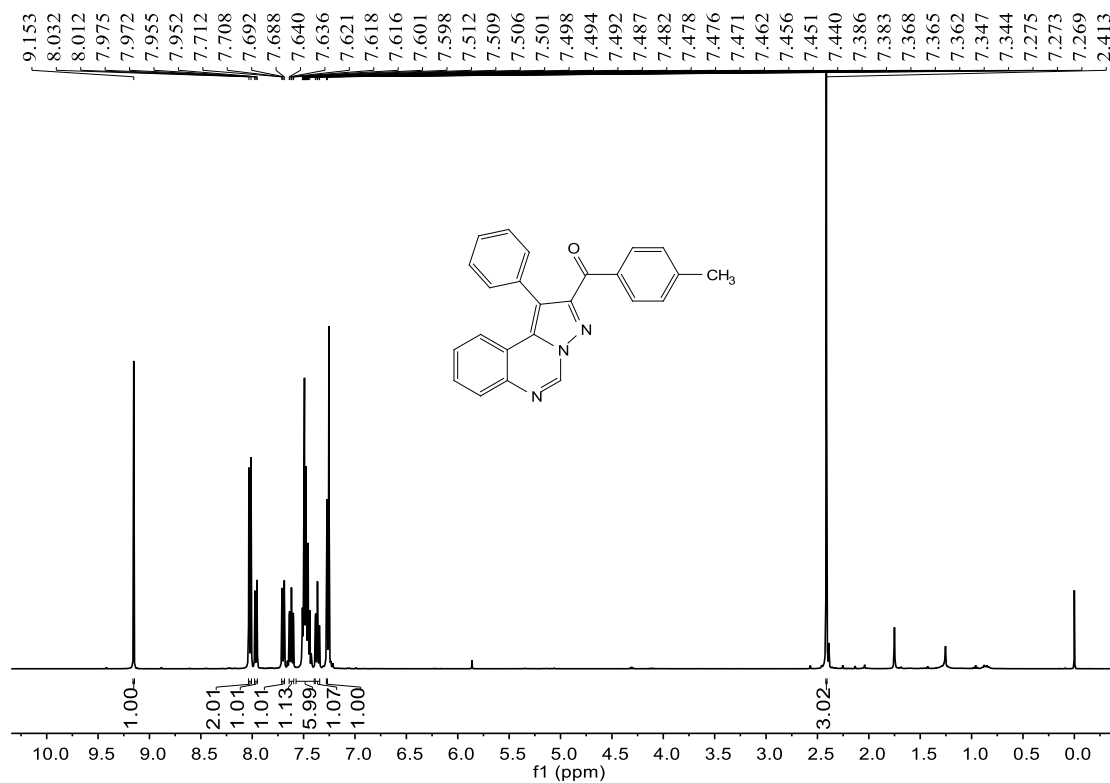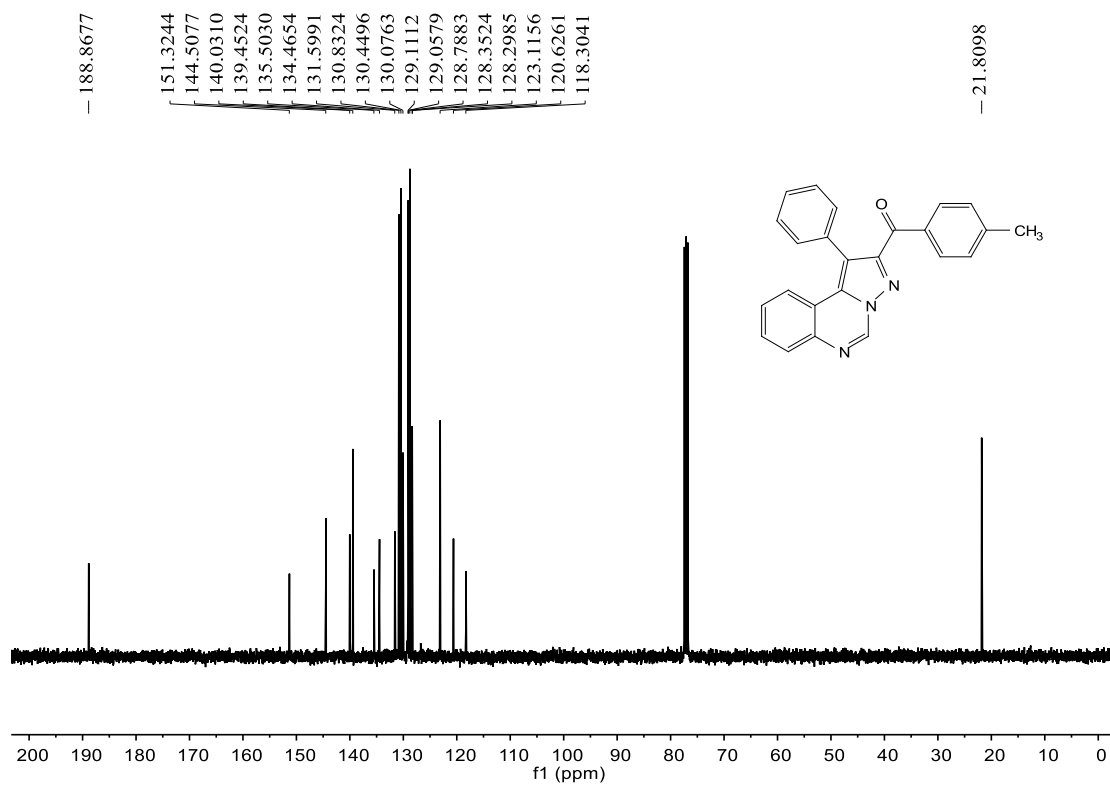

<sup>1</sup>H NMR and <sup>13</sup>C NMR spectra of compound **3aj**

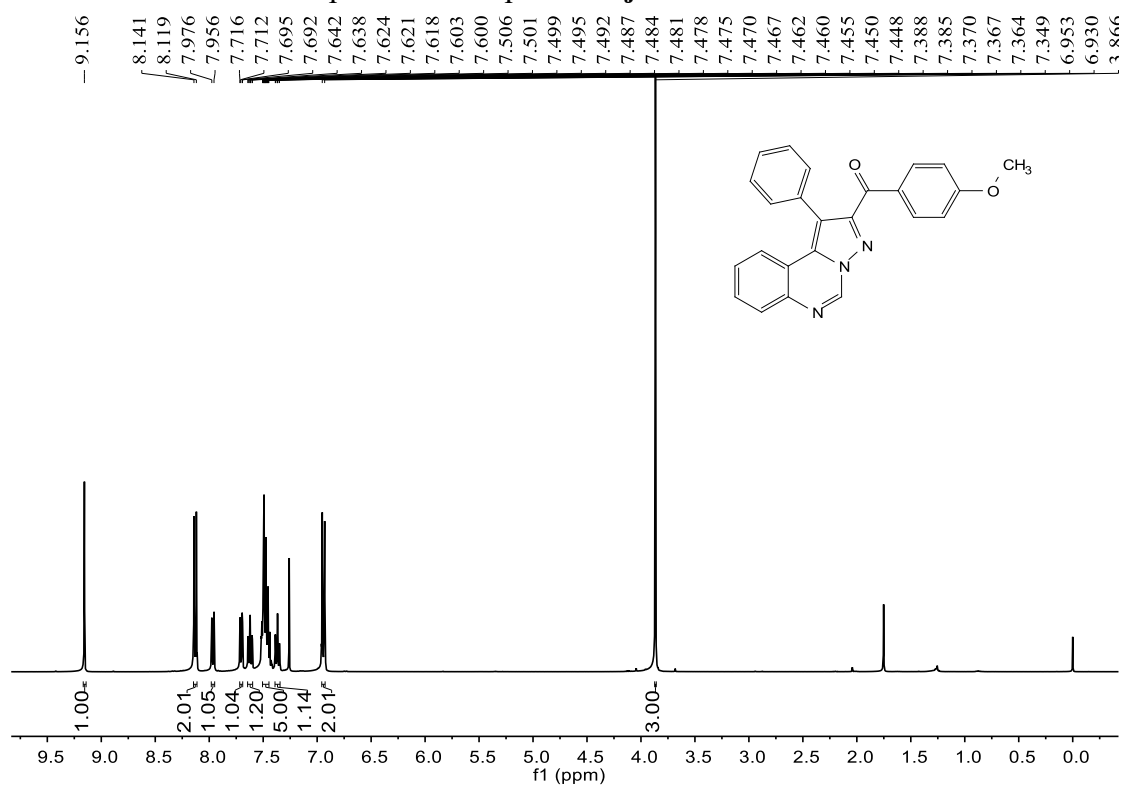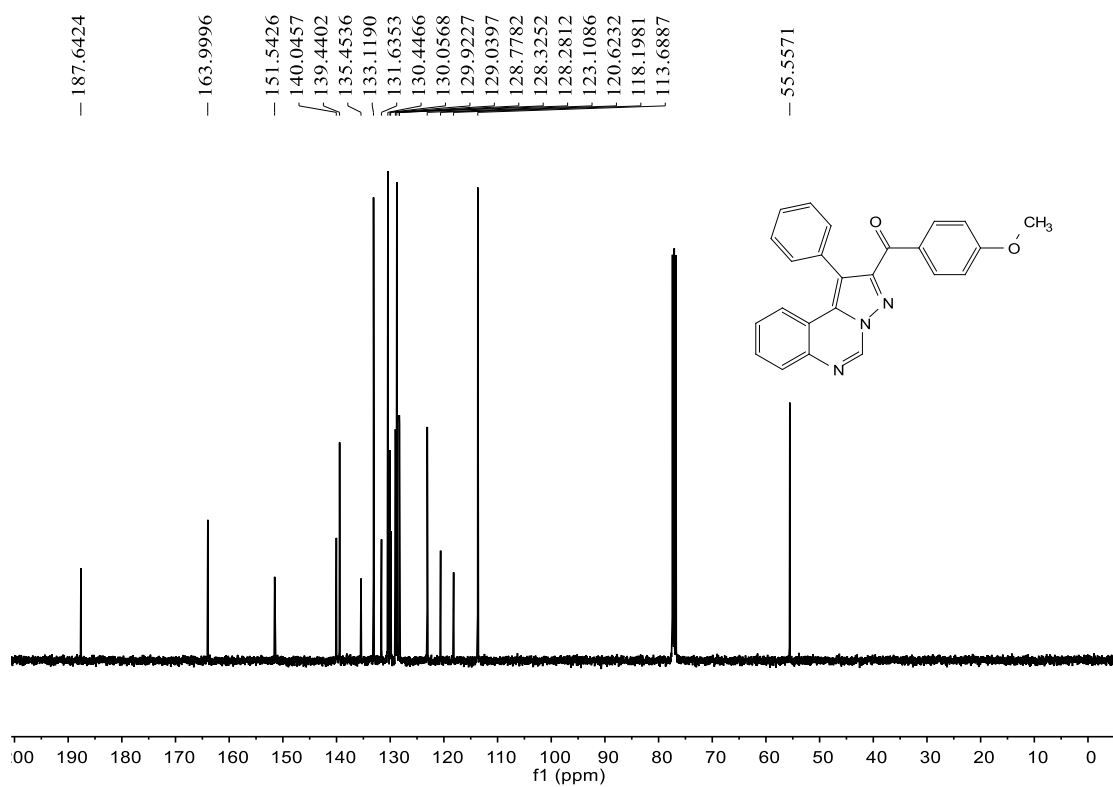



$^1\text{H}$  NMR and  $^{13}\text{C}$  NMR spectra of compound **3ak**

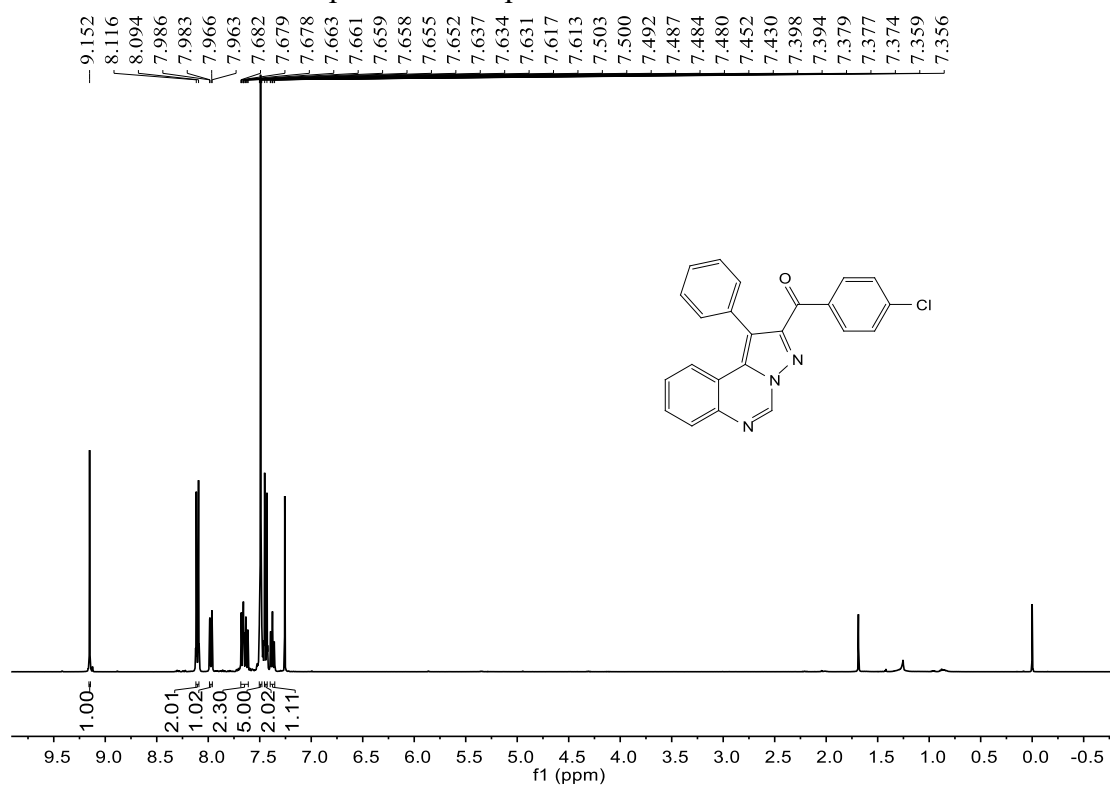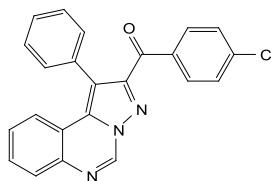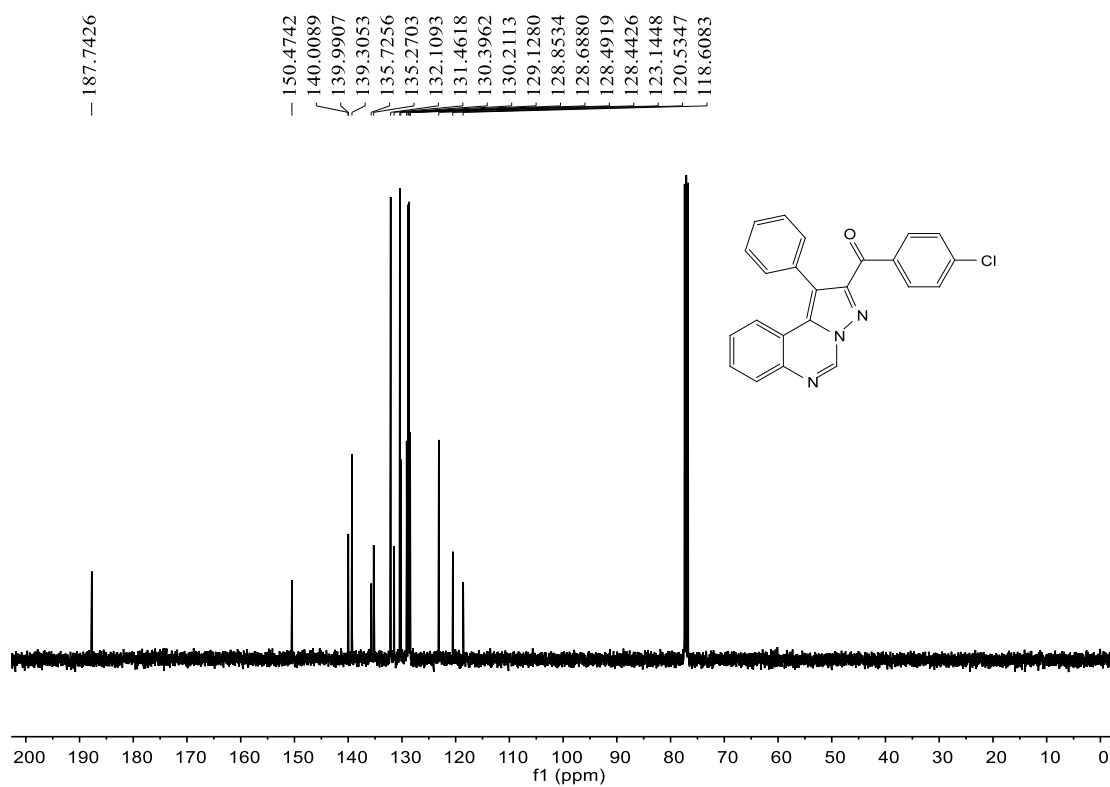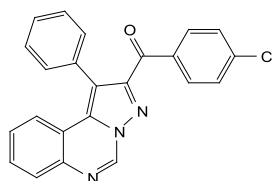

$^1\text{H}$  NMR and  $^{13}\text{C}$  NMR spectra of compound **3al**

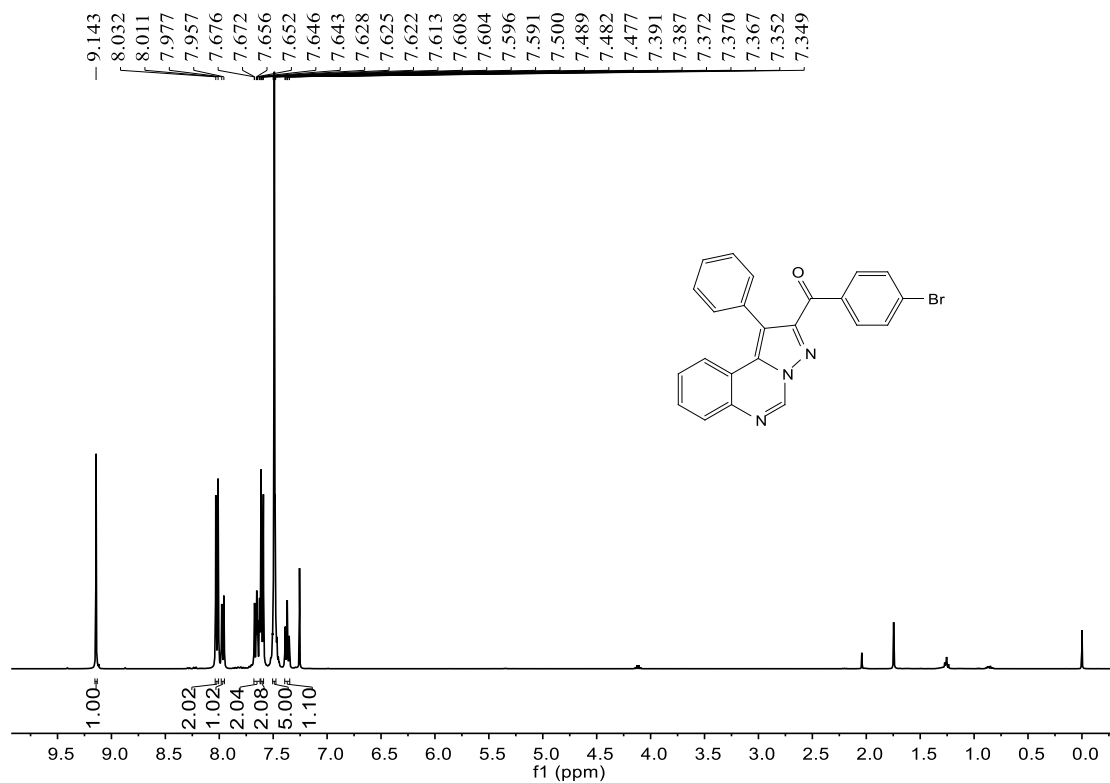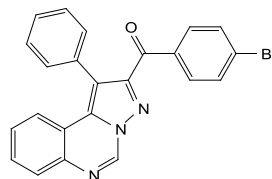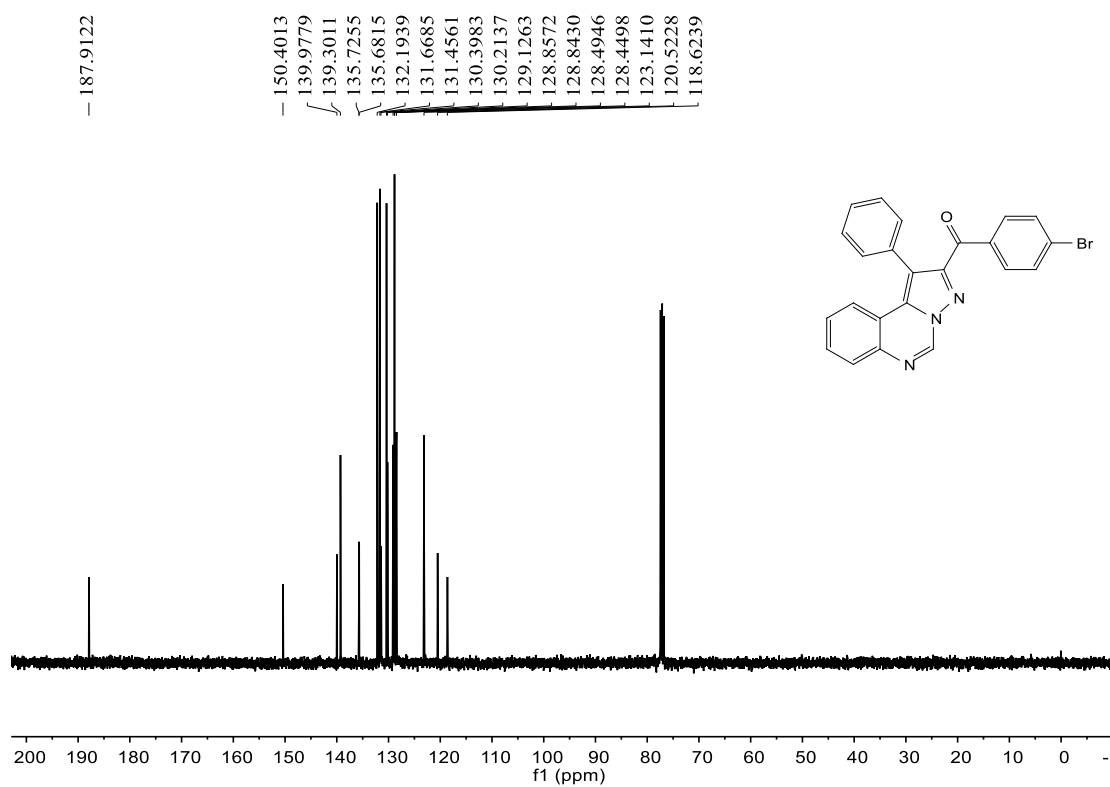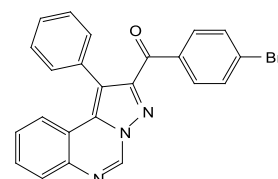

$^1\text{H}$  NMR and  $^{13}\text{C}$  NMR spectra of compound **3am**

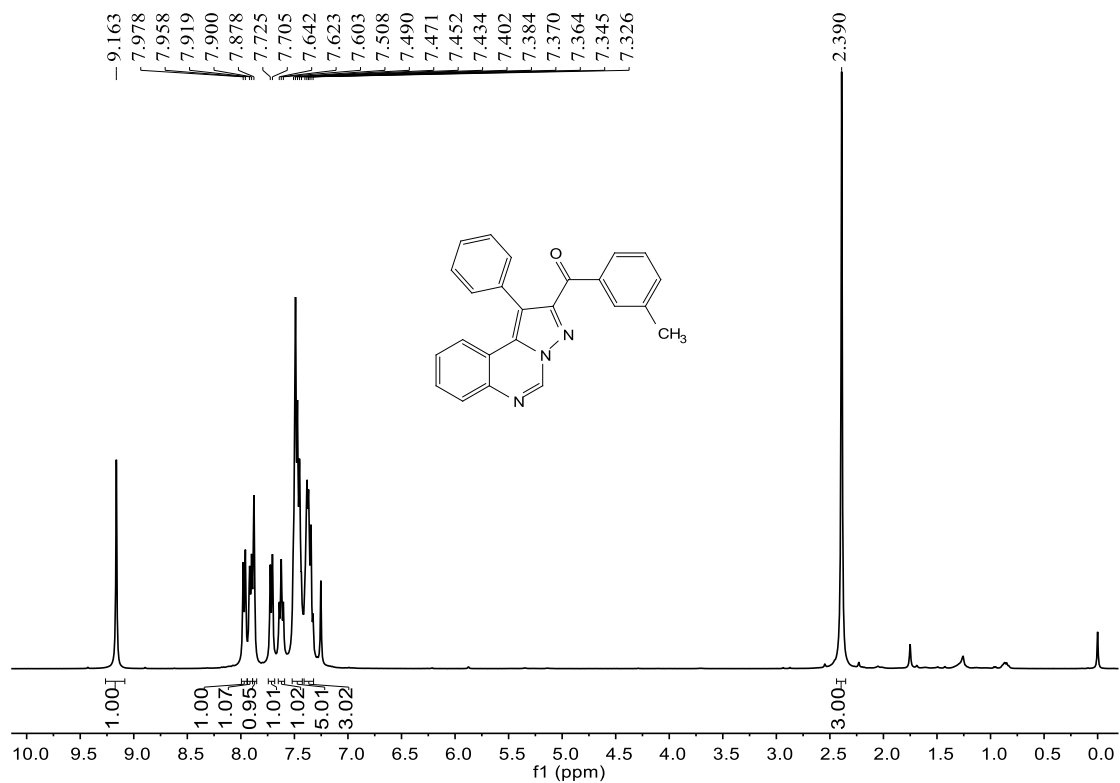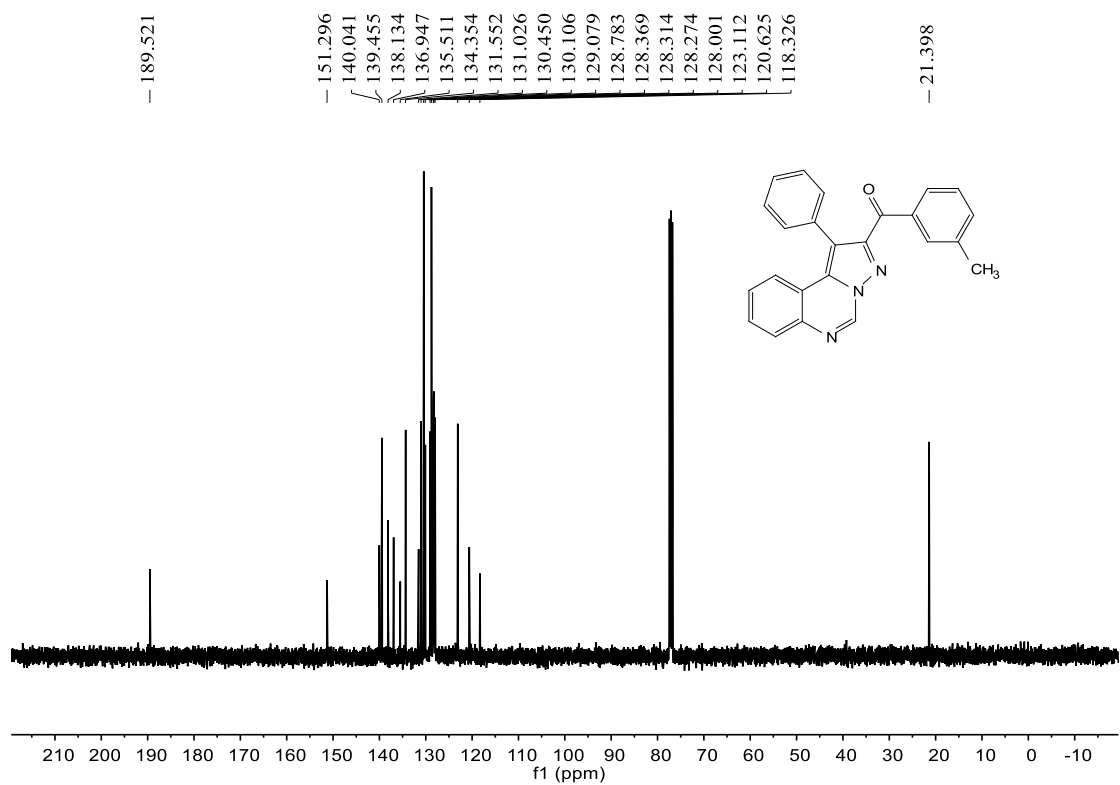

<sup>1</sup>H NMR and <sup>13</sup>C NMR spectra of compound **4aa**

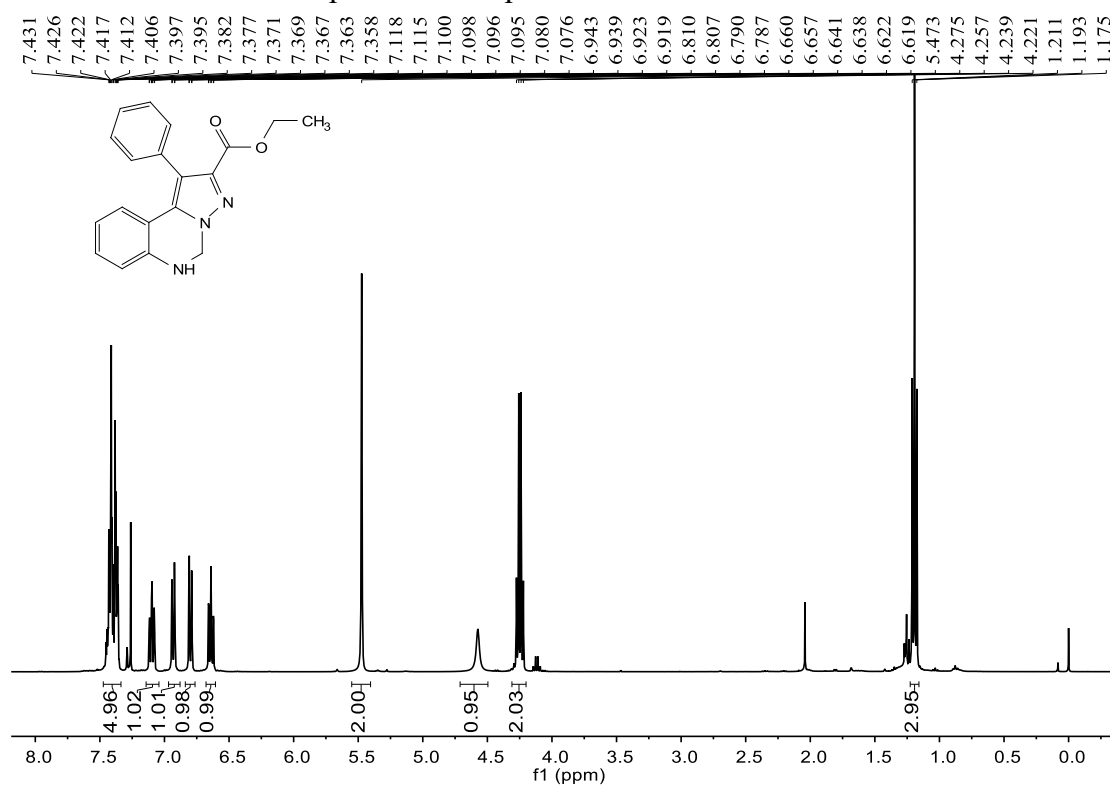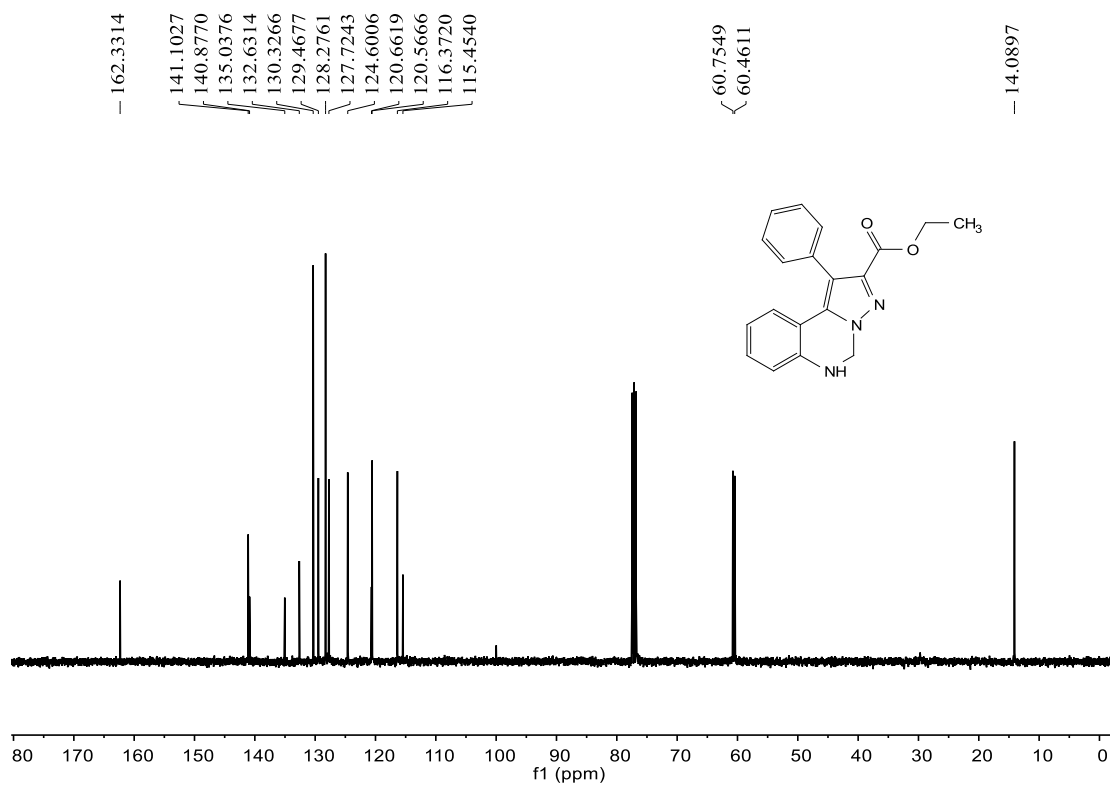

<sup>1</sup>H NMR and <sup>13</sup>C NMR spectra of compound **5aa**

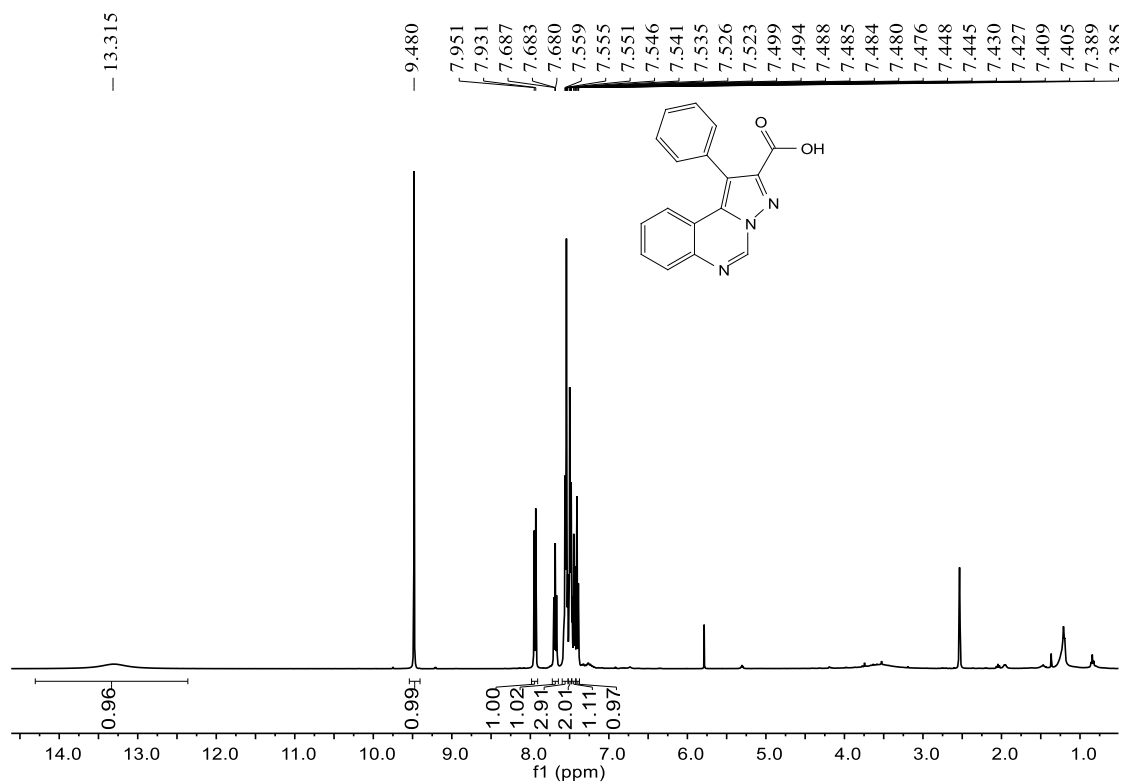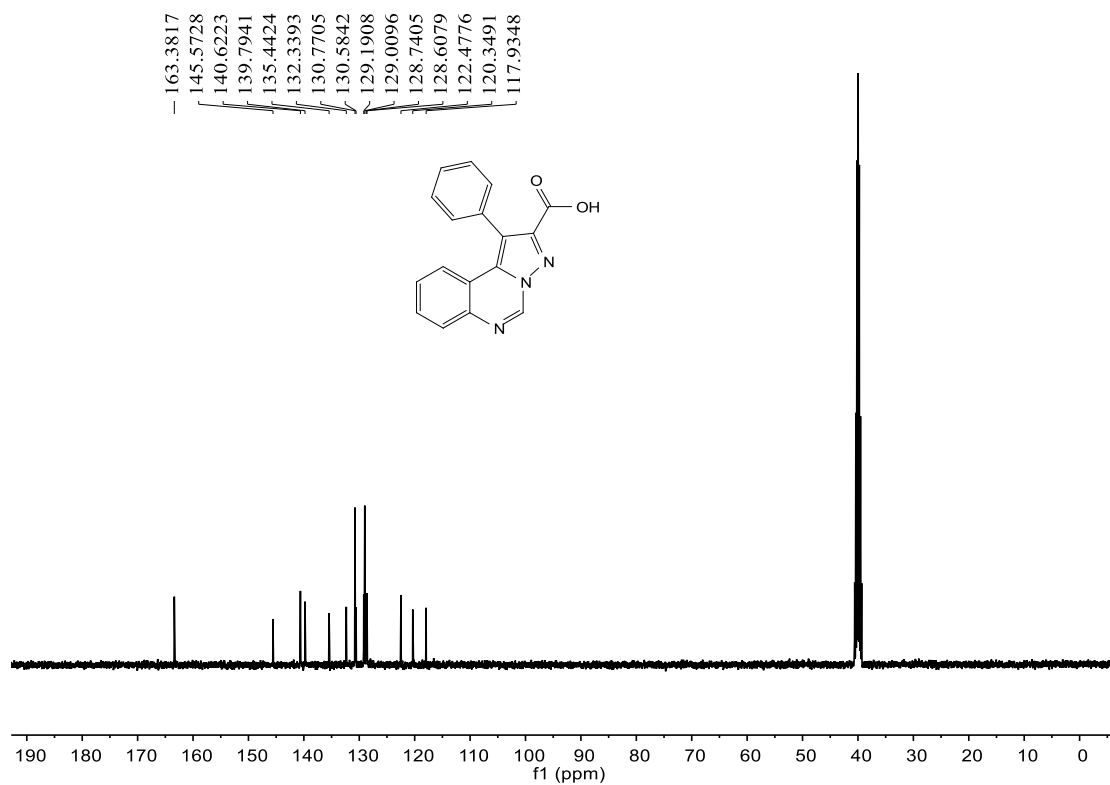

<sup>1</sup>H NMR and <sup>13</sup>C NMR spectra of compound **6aa**

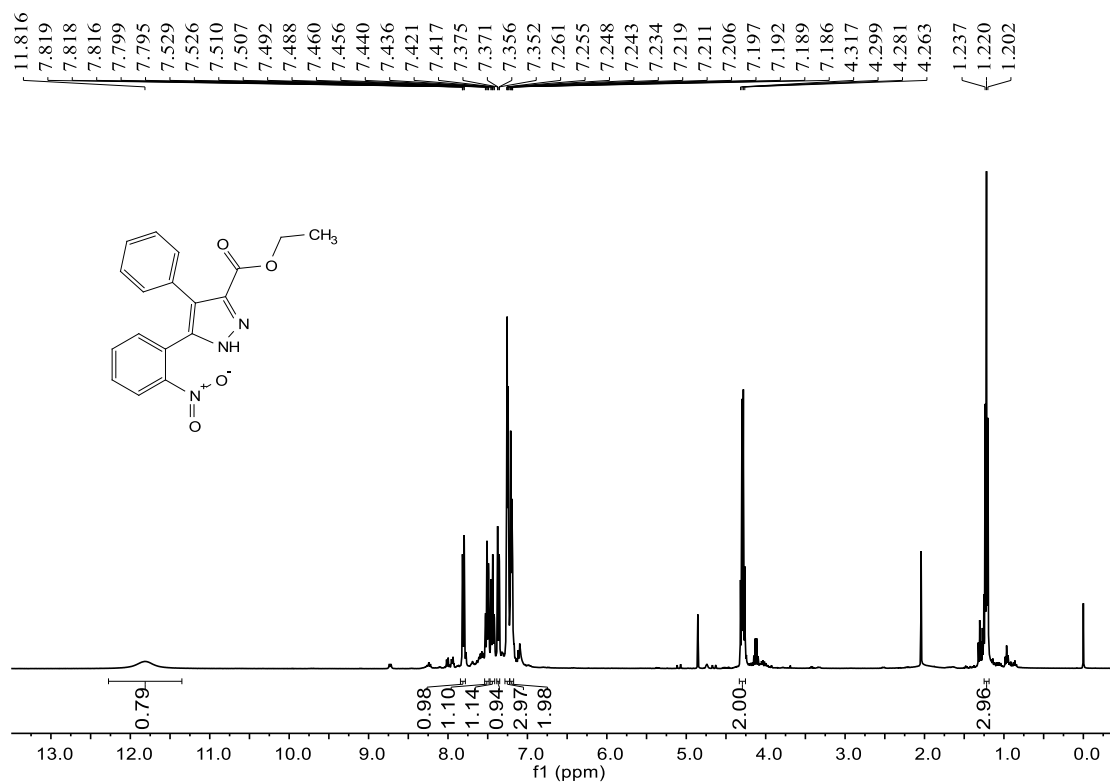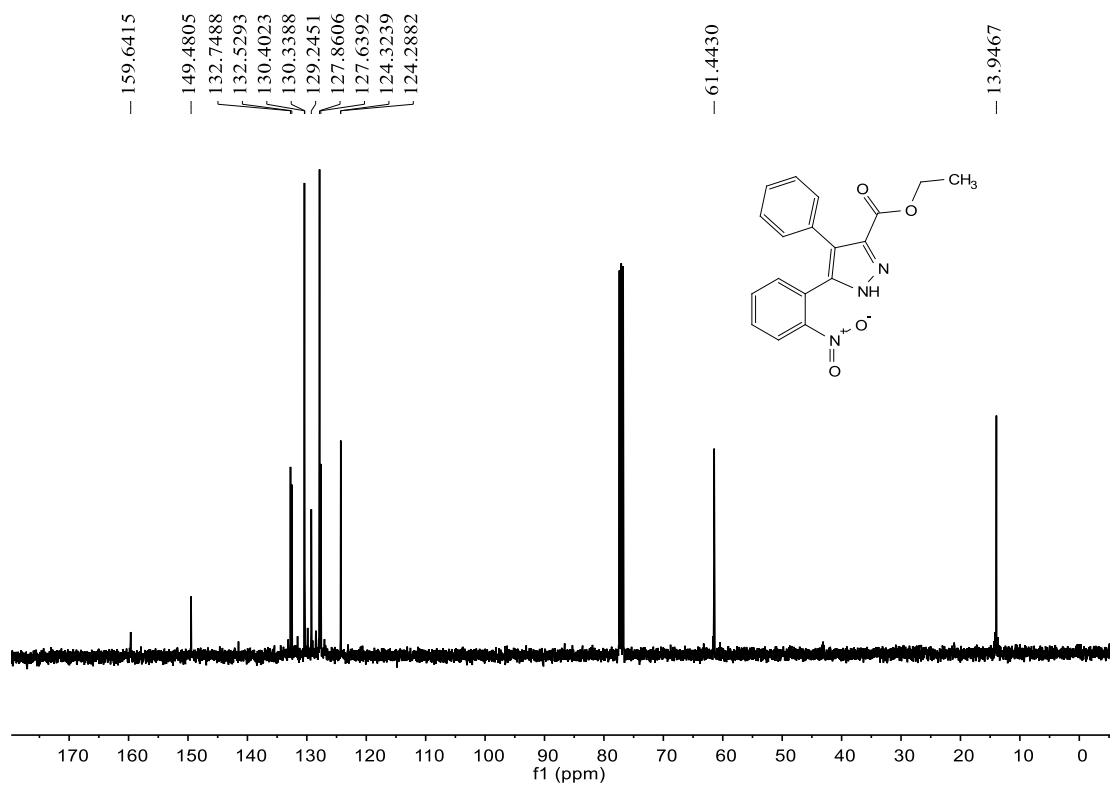

Supplement: d0cc00594k1.pdf [file d0cc00594k1.pdf]
